# Supplementary material for: Thermodynamic limit for synthesis of metastable inorganic materials
Source: PubMed Central journal article supplement — Sci Adv. 2018 Apr 20;4(4):eaaq0148. doi: 10.1126/sciadv.aaq0148 (PMC5930398; doi:10.1126/sciadv.aaq0148), 2018-04-20
Supplement: aaq0148_SM.pdf [file aaq0148_SM.pdf]

## Supplementary Materials for **Thermodynamic limit for synthesis of metastable inorganic materials**

Muratahan Aykol, Shyam S. Dwaraknath, Wenhao Sun, Kristin A. Persson

Published 20 April 2018, *Sci. Adv.* **4**, eaq0148 (2018)

DOI: 10.1126/sciadv.aq0148

### The PDF file includes:

- Supplementary Text
- figs. S1 to S42. Radial distribution functions of amorphous configurations.
- figs. S43 to S83. Bond-angle distribution functions of amorphous configurations.
- fig. S84. Amorphous limit sampling probability.
- fig. S85. Snapshots of atomic structures of amorphous materials.
- fig. S86. Probability of finding the correct, observed ground states.
- fig. S87. PDFs from aggregated uncertainties in the amorphous limit classification of crystalline polymorphs.
- table S1. The amorphous limits for the synthesizability of polymorphs.
- Legend for database S1
- References (53–63)

### Other Supplementary Material for this manuscript includes the following:

(available at [advances.sciencemag.org/cgi/content/full/4/4/eaq0148/DC1](https://advances.sciencemag.org/cgi/content/full/4/4/eaq0148/DC1))

- database S1 (.json format). Energies of amorphous configurations.

## Supplementary Text

### Descriptions of crystalline phases above the amorphous limits

There are, in total, 156 polymorphs above their respective amorphous limits in our set of material systems. Among these, 112 can be directly identified based on the available information: 45 materials have no related Inorganic Crystal Structure Database (ICSD) entry (i.e. they are hypothetical structures in the Materials Project database), 56 materials are hypothetical structures in the ICSD (e.g. Zeolites) and 11 materials are experimental high-pressure phases from the ICSD. On the other hand, there are 44 polymorphs above limits, where the structure source is in the ICSD but no further information was available to provide a description. Therefore, we investigated those separately.

Below we list the polymorphs that are above their respective amorphous limits and can be directly identified based on the available source and tagging information in the database as having no corresponding ICSD entry, as high-pressure structure, or as hypothetical structure are listed below. For each polymorph, the chemical formula is followed by the Materials Project ID (which can be used to access all relevant information at <http://materialsproject.org>) and tags that provide the relevant description. If there is a corresponding ICSD entry, the ICSD-number is given in square brackets. Tags provided are self-explanatory.

- Al<sub>2</sub>O<sub>3</sub> mp-684677 No\_ICSD Hypothetical\_ordering\_of\_disordered\_crystal
- Al<sub>2</sub>O<sub>3</sub> mp-684713 No\_ICSD Hypothetical\_ordering\_of\_disordered\_crystal
- Al<sub>2</sub>O<sub>3</sub> mp-684990 No\_ICSD Hypothetical\_ordering\_of\_disordered\_crystal
- Al<sub>2</sub>O<sub>3</sub> mp-985587 No\_ICSD User\_submission\_to\_Materials\_Project
- C mp-998866 No\_ICSD, User\_submission\_to\_Materials\_Project
- CoO<sub>2</sub> mvc-10954 No\_ICSD High-throughput\_cathode\_search
- CoO<sub>2</sub> mvc-6933 No\_ICSD High-throughput\_cathode\_search
- Fe<sub>2</sub>O<sub>3</sub> mvc-12005 No\_ICSD High-throughput\_cathode\_search
- Ga<sub>2</sub>O<sub>3</sub> mp-13134 [162252] High\_pressure\_ICSD. Erroneous ICSD entry: this entry was later removed from ICSD because Gd<sub>2</sub>S<sub>3</sub> was incorrectly entered as Gd<sub>2</sub>O<sub>3</sub>.
- Ga<sub>2</sub>O<sub>3</sub> mp-685090 No\_ICSD Hypothetical\_ordering\_of\_disordered\_crystal
- GaAs mp-10048 [43951] High\_pressure\_ICSD. In-situ measurement performed during compression, no evidence if this structure would be preserved upon release of pressure.
- MgO mp-1009127 [248386] High-pressure\_ICSD. ICSD reference reports this is a hypothetical structure.
- MgO mp-1009129 [166273] Hypothetical Part\_of\_two\_layered\_model
- MoO<sub>3</sub> mp-705538 No\_ICSD Hypothetical\_ordering\_of\_disordered\_crystal
- MoO<sub>3</sub> mvc-11096 No\_ICSD High-throughput\_cathode\_search
- MoO<sub>3</sub> mvc-13534 No\_ICSD High-throughput\_cathode\_search
- NbO<sub>2</sub> mp-25214 No\_ICSD

- P2O5 mp-689684 No\_ICSD
- P2O5 mp-990076 No\_ICSD User\_submission\_to\_Materials\_Project
- Si mp-1001113 No\_ICSD User\_submission\_to\_Materials\_Project
- Si mp-1014212 No\_ICSD User\_submission\_to\_Materials\_Project
- Si mp-10649 [52459] High\_pressure\_ICSD. In-situ measurement performed during compression, no evidence if such hcp-Si would be preserved upon release of pressure.
- Si mp-27 [52458, 57187] High\_pressure\_ICSD. In-situ measurement performed during compression, no evidence if such fcc-Si would be preserved upon release of pressure.
- Si mp-644693 [109036] High\_pressure\_ICSD. ICSD Reference confirms this phase is yielded by a reversible transformation; i.e. is not preserved upon release of pressure.
- Si mp-676011 [109036] High\_pressure\_ICSD. See the entry above.
- Si3N4 mp-40793 No\_ICSD Hypothetical\_ordering\_of\_disordered\_crystal
- SiO2 mp-12350 [170476] Hypothetical\_Zeolite\_ICSD
- SiO2 mp-32667 No\_ICSD Hypothetical\_ordering\_of\_disordered\_crystal
- SiO2 mp-34150 No\_ICSD Hypothetical\_ordering\_of\_disordered\_crystal
- SiO2 mp-545488 [170548] Hypothetical\_Zeolite\_ICSD
- SiO2 mp-545719 [170510] Hypothetical\_Zeolite\_ICSD
- SiO2 mp-554397 [170551] Hypothetical\_Zeolite\_ICSD
- SiO2 mp-554498 [170519] Hypothetical\_Zeolite\_ICSD
- SiO2 mp-554665 [170500] Hypothetical\_Zeolite\_ICSD
- SiO2 mp-555355 [170522] Hypothetical\_Zeolite\_ICSD
- SiO2 mp-555394 [171735] Hypothetical\_Cluster\_ICSD
- SiO2 mp-555411 [170531] Hypothetical\_Zeolite\_ICSD
- SiO2 mp-555497 [170508] Hypothetical\_Zeolite\_ICSD
- SiO2 mp-555544 [170501] Hypothetical\_Zeolite\_ICSD
- SiO2 mp-555676 [170533] Hypothetical\_Zeolite\_ICSD
- SiO2 mp-555823 [170520] Hypothetical\_Zeolite\_ICSD
- SiO2 mp-556027 [170539] Hypothetical\_Zeolite\_ICSD
- SiO2 mp-556044 [170495] Hypothetical\_Zeolite\_ICSD
- SiO2 mp-556068 [170475] Hypothetical\_Zeolite\_ICSD
- SiO2 mp-556132 [170549] Hypothetical\_Zeolite\_ICSD
- SiO2 mp-556257 [170478] Hypothetical\_Zeolite\_ICSD
- SiO2 mp-556464 [170554] Hypothetical\_Zeolite\_ICSD
- SiO2 mp-556537 [170507] Hypothetical\_Zeolite\_ICSD
- SiO2 mp-556564 [170503] Hypothetical\_Zeolite\_ICSD
- SiO2 mp-556812 [170544] Hypothetical\_Zeolite\_ICSD
- SiO2 mp-556963 [170521] Hypothetical\_Zeolite\_ICSD

- SiO2 mp-557017 [170537] Hypothetical\_Zeolite\_ICSD
- SiO2 mp-557076 [170514] Hypothetical\_Zeolite\_ICSD
- SiO2 mp-557194 [170552] Hypothetical\_Zeolite\_ICSD
- SiO2 mp-557723 [170523] Hypothetical\_Zeolite\_ICSD
- SiO2 mp-557771 [170492] Hypothetical\_Zeolite\_ICSD
- SiO2 mp-557814 [170488] Hypothetical\_Zeolite\_ICSD
- SiO2 mp-558366 [170535] Hypothetical\_Zeolite\_ICSD
- SiO2 mp-558598 [170506] Hypothetical\_Zeolite\_ICSD
- SiO2 mp-558733 [41673] High\_pressure\_ICSD. ICSD Reference confirms this is a hypothetical structure.
- SiO2 mp-558931 [170505] Hypothetical\_Zeolite\_ICSD
- SiO2 mp-559389 [170553] Hypothetical\_Zeolite\_ICSD
- SiO2 mp-559605 [170540] Hypothetical\_Zeolite\_ICSD
- SiO2 mp-559829 [170477] Hypothetical\_Zeolite\_ICSD
- SiO2 mp-559860 [170527] Hypothetical\_Zeolite\_ICSD
- SiO2 mp-560754 [170502] Hypothetical\_Zeolite\_ICSD
- SiO2 mp-560836 [170489] Hypothetical\_Zeolite\_ICSD
- SiO2 mp-560954 [170529] Hypothetical\_Zeolite\_ICSD
- SiO2 mp-561291 [170532] Hypothetical\_Zeolite\_ICSD
- SiO2 mp-561301 [170483] Hypothetical\_Zeolite\_ICSD
- SiO2 mp-561488 [170486] Hypothetical\_Zeolite\_ICSD
- SiO2 mp-572283 [170530] Hypothetical\_Zeolite\_ICSD
- SiO2 mp-600096 No\_ICSD
- SiO2 mp-638033 [170550] Hypothetical\_Zeolite\_ICSD
- SiO2 mp-638035 [170515] Hypothetical\_Zeolite\_ICSD
- SiO2 mp-638038 [170538] Hypothetical\_Zeolite\_ICSD
- SiO2 mp-638049 [170504] Hypothetical\_Zeolite\_ICSD
- SiO2 mp-673168 No\_ICSD Hypothetical\_ordering\_of\_disordered\_crystal
- SiO2 mp-683947 [170536] Hypothetical\_Zeolite\_ICSD
- SiO2 mp-683952 [170487] Hypothetical\_Zeolite\_ICSD
- SiO2 mp-683953 [170484] Hypothetical\_Zeolite\_ICSD
- SiO2 mp-685184 No\_ICSD Hypothetical\_ordering\_of\_disordered\_crystal
- SiO2 mp-6947 [9160, 10078, 20604, 36226, 40098, 40099, 40100, 40101, 40102, 40103, 40104, 40105, 40106, 41668, 41671, 44096, 51701, 68158, 68159, 68160, 68161, 68162, 68163, 68164, 68165, 68166, 68409, 68410, 73073, 74531, 75740, 77523, 92550, 93548, 93549, 93550, 93551, 97181, 97182, 98632, 98633, 109195, 158527, 158528, 158529, 158530, 158531, 158532, 158533, 158534, 158535, 158536, 162631, 162632] High\_pressure\_ICSD. This is the stishovite polymorph that is known to become at low pressures as discussed in the manuscript.

- SiO<sub>2</sub> mp-7905 No\_ICSD
- SiO<sub>2</sub> mp-9258 [70016, 158958, 181307, 181308, 181309, 181310] High\_pressure\_ICSD. In-situ measurement performed during compression, no evidence if this phase would be preserved upon release of pressure.
- SnO mp-999142 [185350] Hypothetical
- SnO<sub>2</sub> mp-562610 [157454, 181282, 181283] High\_pressure\_ICSD
- SnO<sub>2</sub> mvc-13245 No\_ICSD High-throughput\_cathode\_search
- SnO<sub>2</sub> mvc-6071 No\_ICSD High-throughput\_cathode\_search
- SnO<sub>2</sub> mvc-9896 No\_ICSD High-throughput\_cathode\_search
- Ta<sub>2</sub>O<sub>5</sub> mp-676422 No\_ICSD Hypothetical\_ordering\_of\_disordered\_crystal
- Ta<sub>2</sub>O<sub>5</sub> mvc-8453 No\_ICSD High-throughput\_cathode\_search
- TaN mp-1009831 [183426] Hypothetical
- TaN mp-1009833 [67876] Hypothetical
- TaN mp-570454 [76457] High\_pressure\_ICSD. The other entry for the hexagonal  $\epsilon$ -TaN (P6/mmm) is below the amorphous limit. Inspection of this structure indicates Ta and N sites were erroneously assigned to the opposite specie in the entry.
- TiO<sub>2</sub> mp-1008677 [189325] Hypothetical
- TiO<sub>2</sub> mp-25262 No\_ICSD
- TiO<sub>2</sub> mp-572822 No\_ICSD
- TiO<sub>2</sub> mvc-11115 No\_ICSD High-throughput\_cathode\_search
- TiO<sub>2</sub> mvc-11912 No\_ICSD High-throughput\_cathode\_search
- TiO<sub>2</sub> mvc-13391 No\_ICSD High-throughput\_cathode\_search
- TiO<sub>2</sub> mvc-4715 No\_ICSD High-throughput\_cathode\_search
- TiO<sub>2</sub> mvc-5171 No\_ICSD High-throughput\_cathode\_search
- TiO<sub>2</sub> mvc-9726 No\_ICSD High-throughput\_cathode\_search
- VO<sub>2</sub> mp-714931 No\_ICSD
- VO<sub>2</sub> mvc-11089 No\_ICSD High-throughput\_cathode\_search
- VO<sub>2</sub> mvc-11154 No\_ICSD High-throughput\_cathode\_search
- WO<sub>2</sub> mvc-10022 No\_ICSD High-throughput\_cathode\_search
- WO<sub>2</sub> mvc-11221 No\_ICSD High-throughput\_cathode\_search
- WO<sub>3</sub> mvc-11457 No\_ICSD High-throughput\_cathode\_search
- WO<sub>3</sub> mvc-13988 No\_ICSD High-throughput\_cathode\_search
- Y<sub>2</sub>O<sub>3</sub> mp-673247 No\_ICSD Hypothetical\_ordering\_of\_disordered\_crystal

Below we list the polymorphs that are above their respective amorphous limits and have a corresponding ICSD entry, but have no further information in database to describe why structure is above the amorphous limit. Therefore, these structures are inspected manually. Chemical formula of the polymorph is followed by the Materials Project ID (which can be used to access all relevant information at <http://materialsproject.org>) and a short description. The ICSD-numbers are given in square brackets.

- Al<sub>2</sub>O<sub>3</sub> mp-638765 [173014] Description: Unphysical ICSD structure. Possibly erroneous CIF file.
- Al<sub>2</sub>O<sub>3</sub> mp-642363 [161062] Description: Hypothetical structure in the ICSD.
- AlF<sub>3</sub> mp-635425 [30274] Description: Erroneous CIF file.
- BeO mp-1794 [26957, 162676, 163825, 163826, 163827, 163828, 163829] Description: Hypothetical, or possibly very high pressure. This NaCl type polymorph of BeO extensively tested with theory since all other alkaline earth oxides are NaCl type.
- BN mp-601223 [27986] Description: Erroneous structure for the well-known form hexagonal BN.
- C mp-579909 [88812] Description: Hypothetical structure in the ICSD.
- C mp-624889 [88811, 88815] Description: Hypothetical structure in the ICSD.
- CoO<sub>2</sub> mp-556750 [54958, 95440] Description: Part of a modulated superstructure.
- CoO mp-19275 [53059] Description: Problematic calculation. This is the NaCl (Fm $\bar{3}$ m) structure (mp-19079) with tetragonal distortion (I4/mmm). Lack of magnetic ordering might have led to metastable DFT+U state in this case, as the Fm $\bar{3}$ m analog is already much lower in energy. This should have relaxed close to the energy of the Fm $\bar{3}$ m phase (mp-19079) if there were no calculation issues.
- Fe<sub>2</sub>O<sub>3</sub> mp-609465 [36281] Description: Problematic magnetic ordering. Ferromagnetically ordered DFT+U calculation of the same structure (beta Fe<sub>2</sub>O<sub>3</sub>) is more stable and below the amorphous limit.
- Fe<sub>2</sub>O<sub>3</sub> mp-716814 [36281] Description: See the previous entry.
- FeO mp-18905 [27856, 31081, 53519, 60683, 76639, 82233, 82236, 180972, 180973, 180974, 633029, 633031, 633036, 633038] Description: Problematic magnetic ordering. Anti-ferromagnetic ordering is more stable and below the amorphous limit.
- NbO<sub>2</sub> mp-649729 [8244] Description: Same structure from neutron diffraction (e.g. ICSD number 96) relaxed properly and is the ground state in the Materials Project (mp-821). This particular structure has a complication either in the structure source or in the computation.
- SiO<sub>2</sub> mp-10948 [161310] Description: Erroneous CIF file.
- SiO<sub>2</sub> mp-553881 [75668] Description: Hypothetical structure in the ICSD.
- SiO<sub>2</sub> mp-556588 [75667] Description: Hypothetical structure in the ICSD.
- SiO<sub>2</sub> mp-558301 [171736] Description: Hypothetical structure in the ICSD.
- SiO<sub>2</sub> mp-640917 [155252] Description: Amorphous-like structure reported.
- SiO<sub>2</sub> mp-10064 [44271] Description: Hypothetical structure in the ICSD.
- SiO<sub>2</sub> mp-556788 [75666] Description: Hypothetical structure in the ICSD.
- SiO<sub>2</sub> mp-557653 [75665] Description: Hypothetical structure in the ICSD.
- SiO<sub>2</sub> mp-559741 [51702, 161310] Description: Rare high-pressure phase, often found on Mars.
- SiO<sub>2</sub> mp-559273 [171734] Description: Hypothetical structure in the ICSD.
- SiO<sub>2</sub> mp-683970 [171742] Description: Hypothetical structure in the ICSD.
- SiO<sub>2</sub> mp-556319 [75660] Description: Hypothetical structure in the ICSD.
- SiO<sub>2</sub> mp-556880 [75663] Description: Hypothetical structure in the ICSD.
- SiO<sub>2</sub> mp-555960 [171733] Description: Hypothetical structure in the ICSD.

- SiO<sub>2</sub> mp-604717 [162625] Description: This particular structure listed as Keatite is from a computational study. Keatite as obtained from another ICSD entry (mp-559872) is already found to be very close to convex-hull, and below the amorphous limit.
- SiO<sub>2</sub> mp-557244 [75664] Description: Hypothetical structure in the ICSD.
- SiO<sub>2</sub> mp-667448 [83332] Description: Structure derived using a lattice energy minimization based search, attempted to explain NMR data.
- SiO<sub>2</sub> mp-556376 [75669] Description: Hypothetical structure in the ICSD.
- Si mp-16220 [56721] Description: Hypothetical structure in the ICSD.
- Si<sub>3</sub>N<sub>4</sub> mp-583712 [67241] Description: Hypothetical structure in the ICSD.
- Si<sub>3</sub>N<sub>4</sub> mp-568867 [16752] Description: alpha-Si<sub>3</sub>N<sub>4</sub>, as calculated from other ICSD sources [90146 164618 35560 35561 35562 35563 35564 35565 26191 34096 77811 79797 92156 644682], is already found to be the groundstate in Materials Project database. This particular structure is erroneous.
- Si<sub>3</sub>N<sub>4</sub> mp-603694 [159207] Description: See the previous entry for the ICSD numbers for alpha groundstate in Materials Project. This particular report of the alpha structure is originating from a theoretical study.
- Ta<sub>2</sub>O<sub>5</sub> mp-554867 [95462] Description: Structures of low temperature Ta<sub>2</sub>O<sub>5</sub> (including beta and Z) are problematic. According to Wu et al. (53), both are dynamically unstable and their symmetry needs to be lowered compared to experimental reports, which lowers their energy in GGA by about 0.25 eV/atom via distortions. Therefore, this high-symmetry entry does not provide the correct GGA energy.
- Ta<sub>2</sub>O<sub>5</sub> mp-624688 [280397] Description: See description provided for the previous entry.
- TiO<sub>2</sub> mp-636827 [97008] Description: Surface reconstruction of SrTiO<sub>3</sub>, not the representative bulk structure.
- TiO<sub>2</sub> mp-655656 [97008] Description: See the previous entry.
- V<sub>2</sub>O<sub>5</sub> mp-624689 [43132] Description: Problem with the crystal structure. Reports of the same mineral (e.g. ICSD 99808 157988 647638 653926 82151 82152 24042 40488 15798 94904 41030 60767) are identical and found to be the groundstate.
- VO<sub>2</sub> mp-636976 [1501] Description: Structure looks unusual. There has to be V-O octahedra as also referred in the original paper by Ghedira et al. (54), which are not reproduced in the structure obtained from the corresponding CIF file. Erroneous entry.
- VO<sub>2</sub> mp-636921 [1503] Description: See the previous entry.
- VO<sub>2</sub> mp-566801 [1503] Description: See the previous entry.
- ZnO mp-13161 [163382, 182360] Description: Hypothetical (possibly very high pressure) structure.

#### Accuracy of density functional theory in predicting the amorphous limit and relative stabilities of polymorphs

Recent studies show that the average density functional theory (DFT) with Perdew-Burke-Ernzerhof functional (PBE) errors in “formation energies” vary from ~0.05 to ~0.1 eV/atom (14, 55, 56), which are further found to be comparable to the level of

disparities among experimental formation energies (14). Therefore, the “error” in formation energies in fact cannot be solely attributed to PBE either. More importantly, typical errors associated with comparing energies of compounds of similar chemistries within the same chemical system (rather than formation energies with respect to elemental reference states) are known to be much smaller. Hautier et al. (38) did a thorough analysis of reaction energies between binary and ternary compounds in the same chemical systems and showed the mean absolute error in PBE reaction energies among such compounds with respect to a well-curated set of experimental energies is close to zero (i.e. indicating no obvious systematic error), with a standard deviation of  $\sim 24$  meV/atom due to substantial error cancellation when similar chemistries are compared. Therefore, considering that we are comparing “polymorphs” that have the same chemical constituents and composition,  $\sim 24$  meV/atom is likely an upper-bound for the typical errors we would expect from PBE in the present study. To estimate the range of possible DFT errors specifically in measuring the relative energies of polymorphs, we performed a series of statistical simulations presented in fig. S86. We observe that the maximum permissible level of random DFT errors drawn from a Gaussian distribution with standard deviation of  $\sigma$  to correctly produce the groundstate (as it is already achieved by DFT in these systems) within 5 meV/atom, with a probability of at least 90%, are  $\sigma$  of  $\sim 12$ ,  $\sim 8$ ,  $\sim 5$  and  $\sim 2$  meV/atom for  $\text{Al}_2\text{O}_3$ , GaN,  $\text{V}_2\text{O}_5$  and ZnS, respectively, with slightly smaller values for exactly identifying the groundstate and slightly larger values for a tolerance of 10 meV/atom. While a more thorough analysis of DFT errors in polymorphic systems is required for more accurate assessments, these observations at least imply that possible random DFT errors in measuring relative energies of polymorphs show some chemistry dependence, and are likely much smaller compared to 24 meV/atom estimated for compound reaction energies by Hautier et al. (38), as we expected, and likely around  $\sim 12$  meV/atom or below. Such DFT errors in polymorphic systems are expected to be rather non-random, arising from structure and chemistry specific deficiencies of DFT calculations, including but not limited to the lack of van der Waals interactions, inadequate magnetic configurations or pseudopotentials, lack of proper description of correlation effects, and other inadequacies of the exchange-correlation functional used.

#### Statistical evaluation of the aggregated uncertainties in amorphous energies and DFT

We performed further statistical simulations presented in fig. S87 to measure the probability that *at least one material that has been synthesized is misclassified as unsynthesizable* due to aggregated uncertainties of amorphous energies and random DFT errors, both described separately in Materials and Methods and Supplementary Text. We evaluate such probability distributions as a function of sample size  $n$  of amorphous energies and with multiple zero-centered Gaussian-distributions for random DFT errors described by standard-deviations ( $\sigma$ ) ranging from the largest  $\sigma$  of  $\sim 12$  meV/atom estimated above to the  $\sim 24$  meV/atom upper-bound estimate by Hautier et al. (38). We observe in fig. S87 that there is a certain amount of cancellation between the random DFT error and the unidirectional (only positive) sampling error in amorphous energies (See Fig. 4) in the final aggregated PDFs. We set the *amorphous energy = synthesis limit* as our *null hypothesis*. Finally, we show in fig. S87 that the alternative hypothesis *amorphous energy < synthesis limit* can be rejected on the basis of existing amorphous



data and reasonable ranges of random DFT errors as estimated above for polymorphic systems.

#### Atomic structures of amorphous configurations.

As shown in fig. S1, for amorphous  $\text{Al}_2\text{O}_3$ , the partial radial distribution functions obtained from the final, optimized amorphous structures are in good agreement with the experimental results of Lamparter and Kniep (45) (where partial functions were obtained by reverse Monte Carlo simulation of X-ray and neutron diffraction data). The experimental Al-O, O-O and Al-Al bond distances of 1.8, 2.8, and 3.2 Å, respectively, also agree well with the peak positions in fig. S1.

Figures S2-S42 show the partial radial distribution functions (RDFs),  $g_{ij}(r)$ , of amorphous structures and their ab-initio molecular dynamics (AIMD) generated liquids in 41 material systems considered in this work, where solid and open-circles connected with dashed lines correspond to liquid and amorphous phases, respectively. The densities ( $\rho$ ) of the liquid and amorphous structures are also shown as insets. Bond-angle distribution functions (BDFs) of the amorphous structures are shown in figs. S43-S83. The BDFs are denoted in the form X-Y-Z, where the angle between X-Y and Y-Z vectors are measured; i.e., Y is the central atom in the triplet. A five-point Savitzky-Golay filter was applied to both RDFs and BDFs to obtain smoother functions for better visualization.

All liquids are observed to have a well-defined short range order, but still have very broad RDF peaks, with little to no order beyond first coordination shells. In amorphous structures, the intensity of the RDF peaks increase significantly relative to liquids, signaling the increase in short-range order. Generally, hetero-chemical coordination is highly favored, and no substantial nearest-neighbor coordination is observed between identical species. Exceptions to this observation are small amounts of N-N or O-O coordinations, for instance, in BN, GaN,  $\text{Si}_3\text{N}_4$ , and a few oxides such as  $\text{CoO}_2$ ,  $\text{In}_2\text{O}_3$  and  $\text{P}_2\text{O}_5$ . Homopolar coordinations were also observed in previous molecular simulations of similar amorphous materials in literature (57–60). Overall, RDFs show successful *ab-initio* generation of amorphous structures, with well-captured short-range order.

For most of the amorphous structures, BDFs are broad, concentrating around certain angles pertaining to local packing of hetero-coordinated species (e.g. in 3-, 4-, 5- and 6-fold coordinated structural units), as expected from the disordered packing of a distribution of such local units in amorphous materials. Systems with exceptionally sharp BDFs that deviate from this general trend are that of network forming oxides  $\text{B}_2\text{O}_3$  and  $\text{Si}_2\text{O}_3$ , and BN, shown in fig. S45, S69, and S46, respectively. Amorphous  $\text{B}_2\text{O}_3$  is comprised of B-centered triangular  $\text{BO}_3$  units analogous to its crystalline counterpart, some of which also form boroxol rings, which gives rise to sharp peaks in O-B-O, B-O-O and O-O-O BDFs. The broad B-B-B BDF in the amorphous  $\text{B}_2\text{O}_3$  shows the packing of these units is in fact highly disordered. These findings are consistent with the previous reports in literature (61). Amorphous  $\text{SiO}_2$  also has a rigid local unit, the well-known tetrahedral  $\text{SiO}_4$  packing, giving rise to sharp peaks in BDFs, which are also packed disorderly as evident from the broad Si-Si-Si BDF, again in agreement with the current

understanding of vitreous silica (62, 63). Sharp peaks in all BDFs of BN arise from the formation of small but well-defined regions of nearly planar hexagonal B-N rings in the amorphous phase, analogous to the hexagonal graphite-type symmetry in the crystalline BN and occasional. Similar observations were also reported in a recent ab-initio molecular dynamics study of amorphous BN (57).

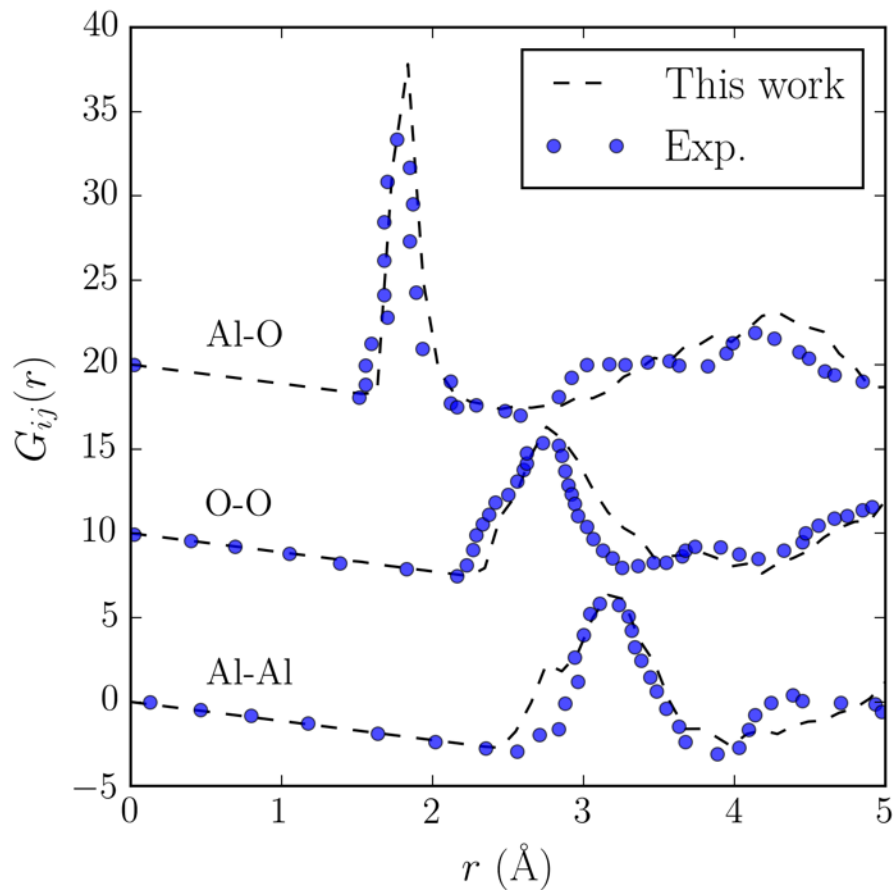

**fig. S1. Radial distribution functions of amorphous configurations.** Comparison of the partial radial distribution functions of AIMD + DFT relaxation computed amorphous  $\text{Al}_2\text{O}_3$  snapshots with experimental data from Lamparter and Kneip (49).  $g_{ij}(r)$  is converted to the  $G_{ij}(r) = 4r[g_{ij}(r) - 1]$  for comparison.

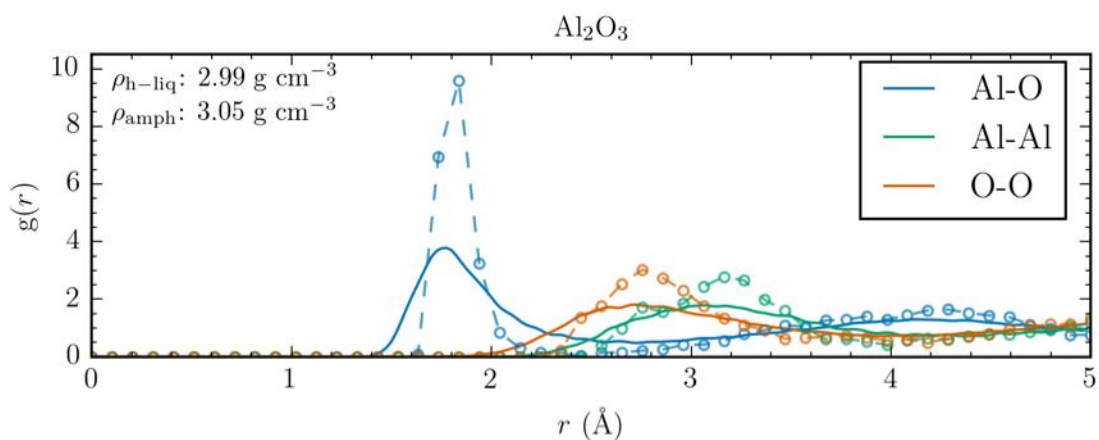

**fig. S2. Radial distribution functions of amorphous configurations.** Partial radial distribution functions of AIMD-generated amorphous  $\text{Al}_2\text{O}_3$  and the parent high-temperature hypothetical liquid that amorphous configurations are quenched from.

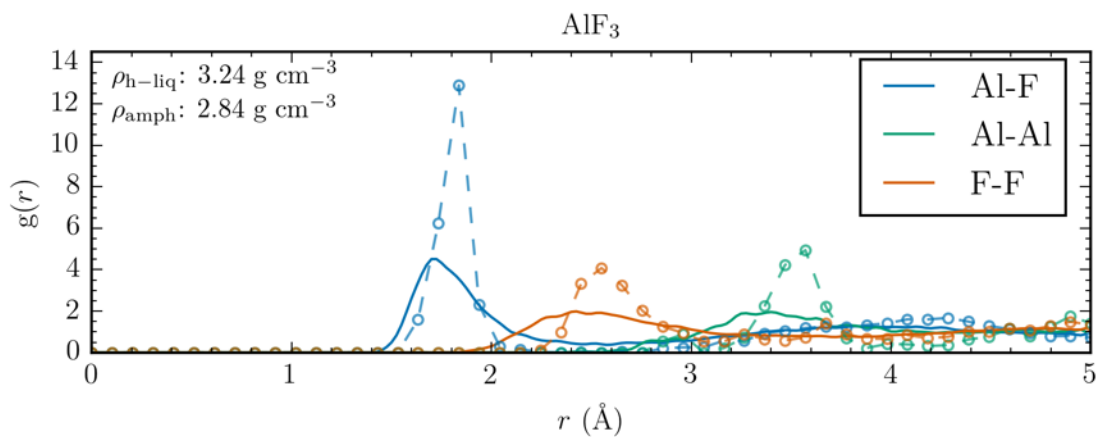

**fig. S3. Radial distribution functions of amorphous configurations.** Partial radial distribution functions of AIMD-generated amorphous  $\text{AlF}_3$  and the parent high-temperature hypothetical liquid that amorphous configurations are quenched from.

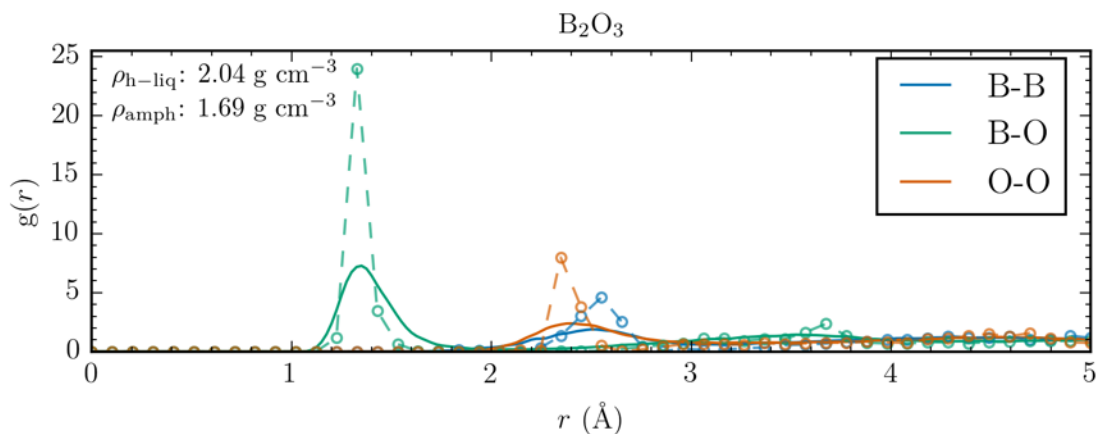

**fig. S4. Radial distribution functions of amorphous configurations.** Partial radial distribution functions of AIMD-generated amorphous  $B_2O_3$  and the parent high-temperature hypothetical liquid that amorphous configurations are quenched from.

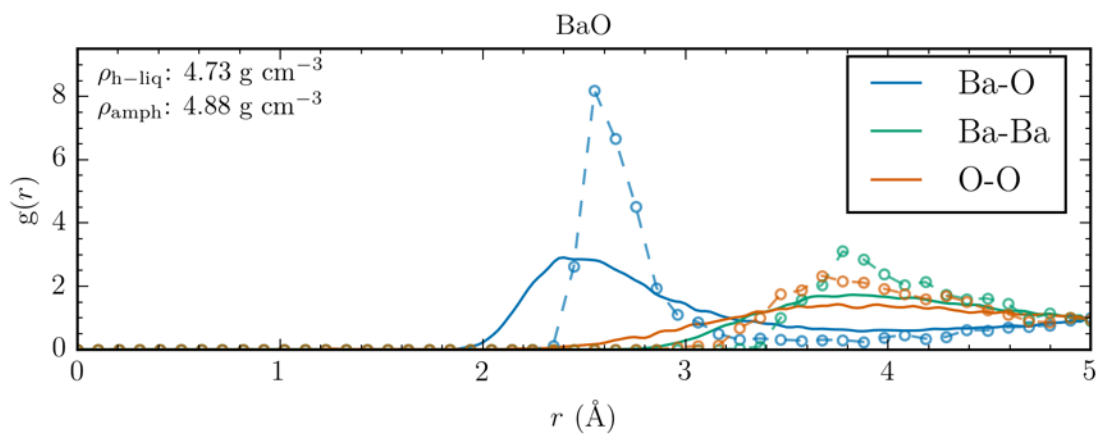

**fig. S5. Radial distribution functions of amorphous configurations.** Partial radial distribution functions of AIMD-generated amorphous  $BaO$  and the parent high-temperature hypothetical liquid that amorphous configurations are quenched from.

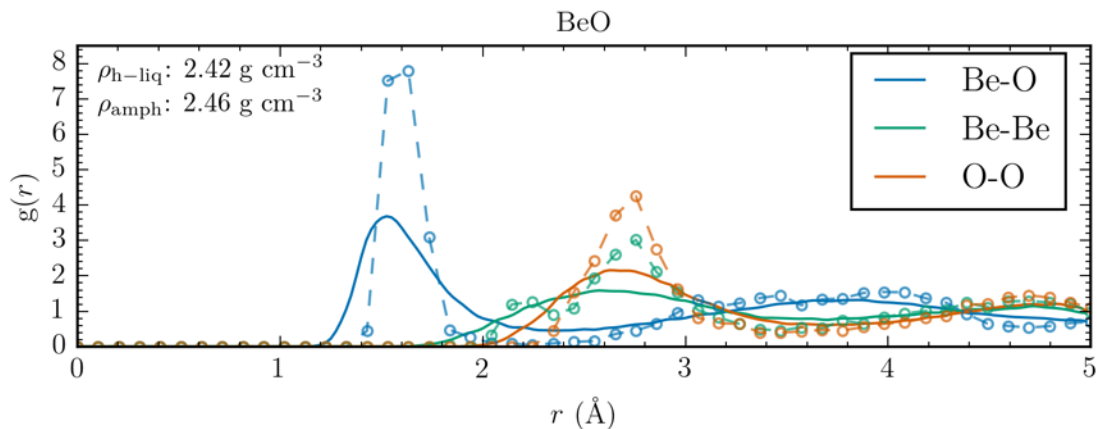

**fig. S6. Radial distribution functions of amorphous configurations.** Partial radial distribution functions of AIMD-generated amorphous BeO and the parent high-temperature hypothetical liquid that amorphous configurations are quenched from.

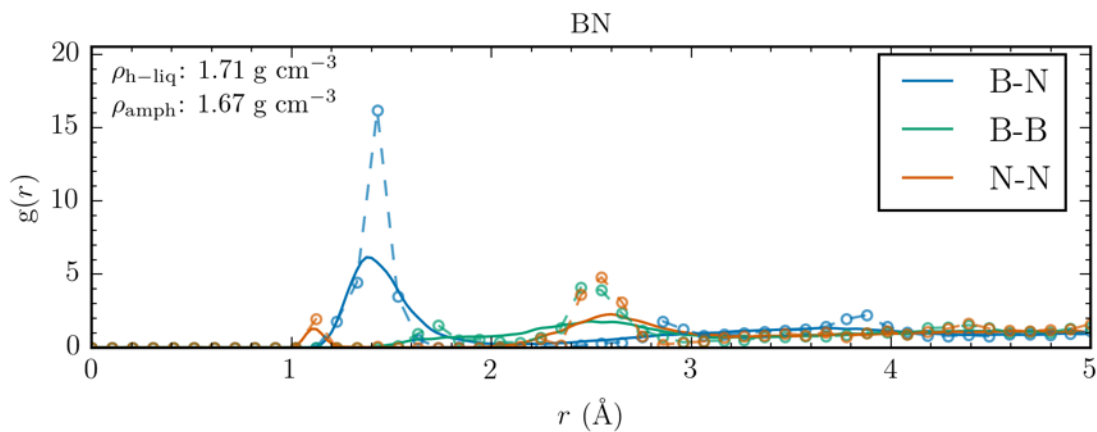

**fig. S7. Radial distribution functions of amorphous configurations.** Partial radial distribution functions of AIMD-generated amorphous BN and the parent high-temperature hypothetical liquid that amorphous configurations are quenched from.

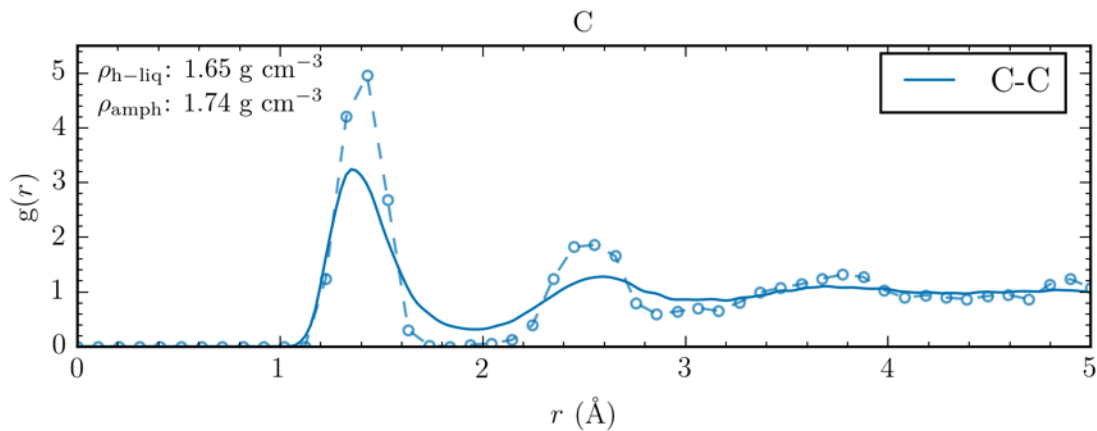

**fig. S8. Radial distribution functions of amorphous configurations.** Partial radial distribution functions of AIMD-generated amorphous C and the parent high-temperature hypothetical liquid that amorphous configurations are quenched from.

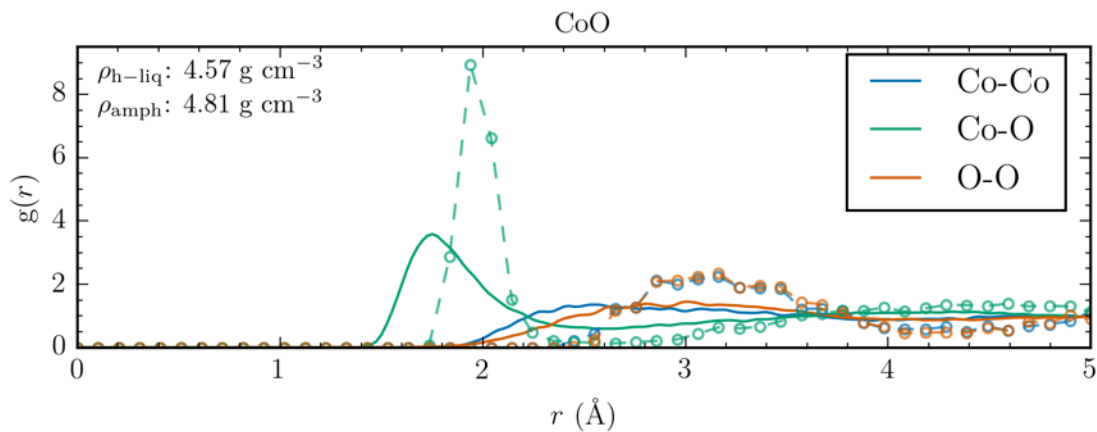

**fig. S9. Radial distribution functions of amorphous configurations.** Partial radial distribution functions of AIMD-generated amorphous CoO and the parent high-temperature hypothetical liquid that amorphous configurations are quenched from.

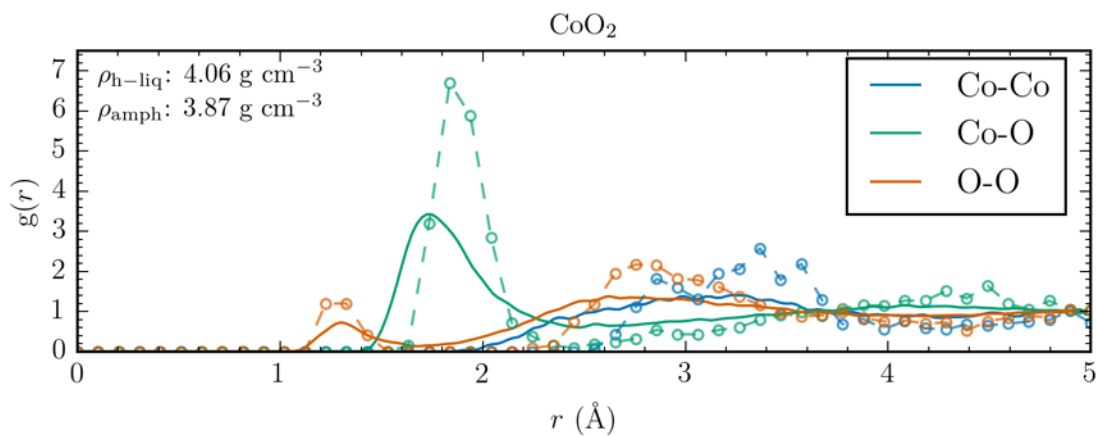

**fig. S10. Radial distribution functions of amorphous configurations.** Partial radial distribution functions of AIMD-generated amorphous  $\text{CoO}_2$  and the parent high-temperature hypothetical liquid that amorphous configurations are quenched from.

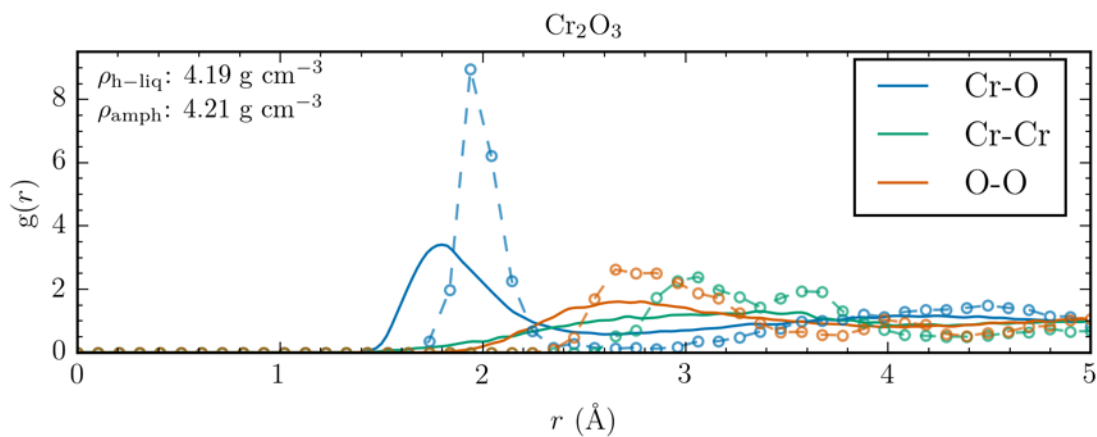

**fig. S11. Radial distribution functions of amorphous configurations.** Partial radial distribution functions of AIMD-generated amorphous  $\text{Cr}_2\text{O}_3$  and the parent high-temperature hypothetical liquid that amorphous configurations are quenched from.

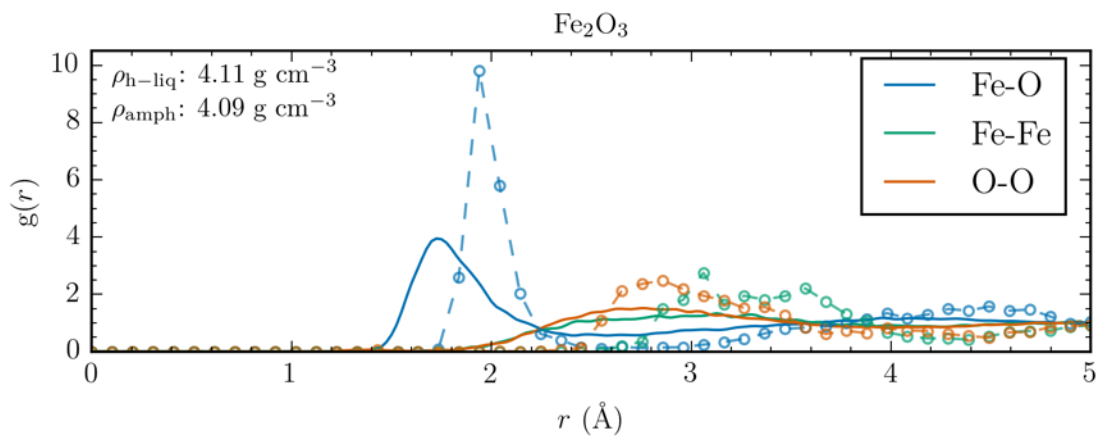

**fig. S12. Radial distribution functions of amorphous configurations.** Partial radial distribution functions of AIMD-generated amorphous  $\text{Fe}_2\text{O}_3$  and the parent high-temperature hypothetical liquid that amorphous configurations are quenched from.

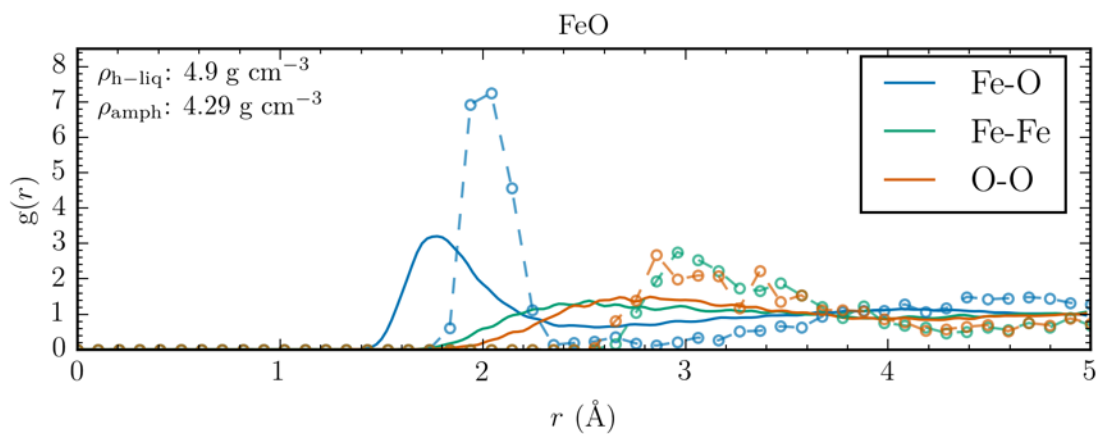

**fig. S13. Radial distribution functions of amorphous configurations.** Partial radial distribution functions of AIMD-generated amorphous  $\text{FeO}$  and the parent high-temperature hypothetical liquid that amorphous configurations are quenched from.



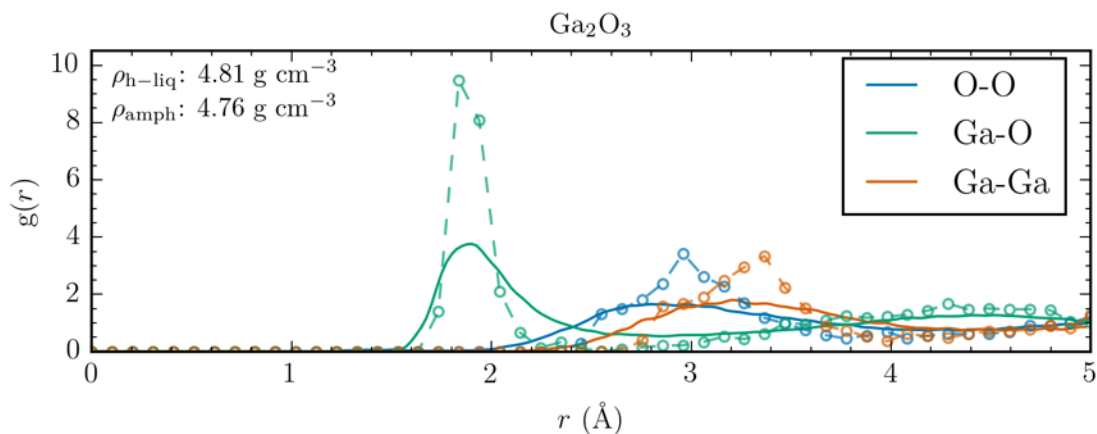

**fig. S14. Radial distribution functions of amorphous configurations.** Partial radial distribution functions of AIMD-generated amorphous  $\text{Ga}_2\text{O}_3$  and the parent high-temperature hypothetical liquid that amorphous configurations are quenched from.

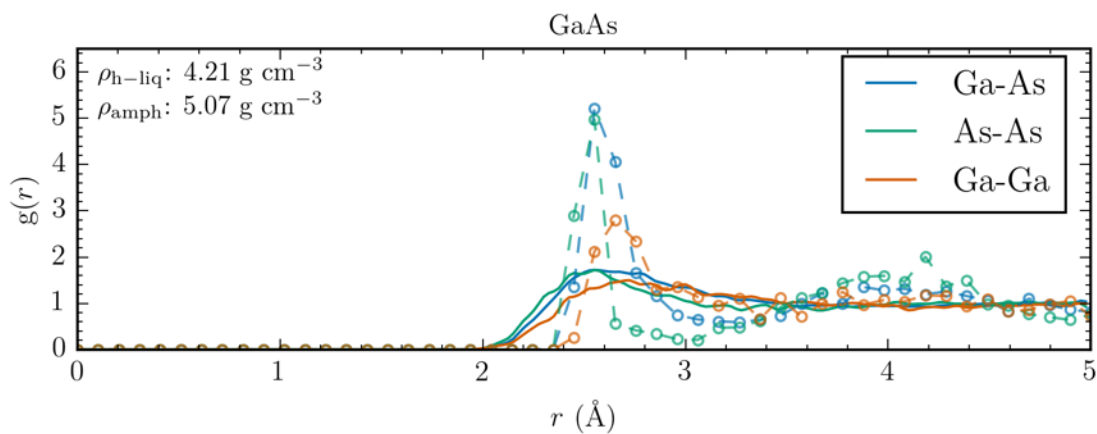

**fig. S15. Radial distribution functions of amorphous configurations.** Partial radial distribution functions of AIMD-generated amorphous  $\text{GaAs}$  and the parent high-temperature hypothetical liquid that amorphous configurations are quenched from.

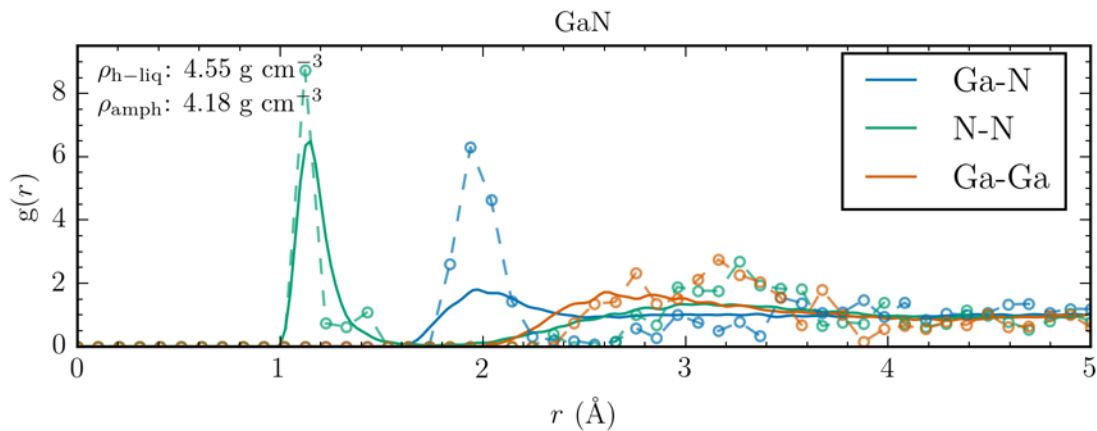

**fig. S16. Radial distribution functions of amorphous configurations.** Partial radial distribution functions of AIMD-generated amorphous GaN and the parent high-temperature hypothetical liquid that amorphous configurations are quenched from.

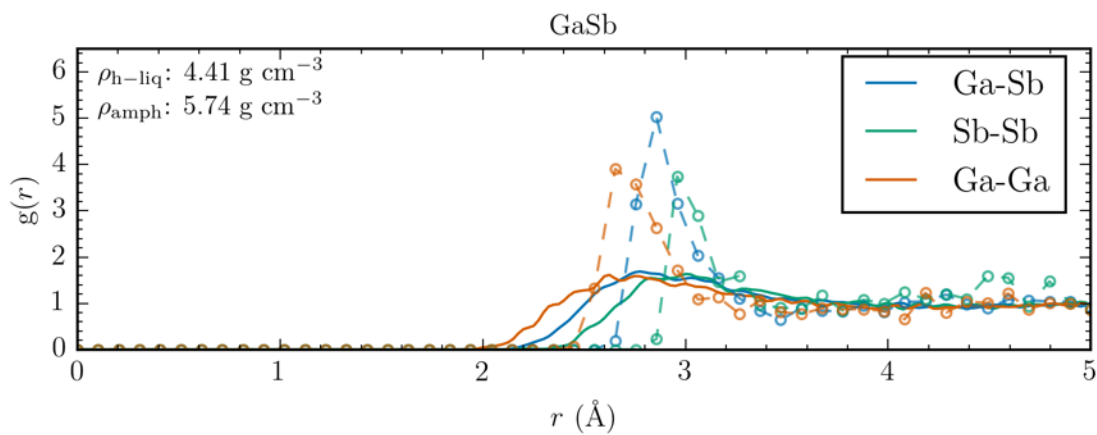

**fig. S17. Radial distribution functions of amorphous configurations.** Partial radial distribution functions of AIMD-generated amorphous GaSb and the parent high-temperature hypothetical liquid that amorphous configurations are quenched from.

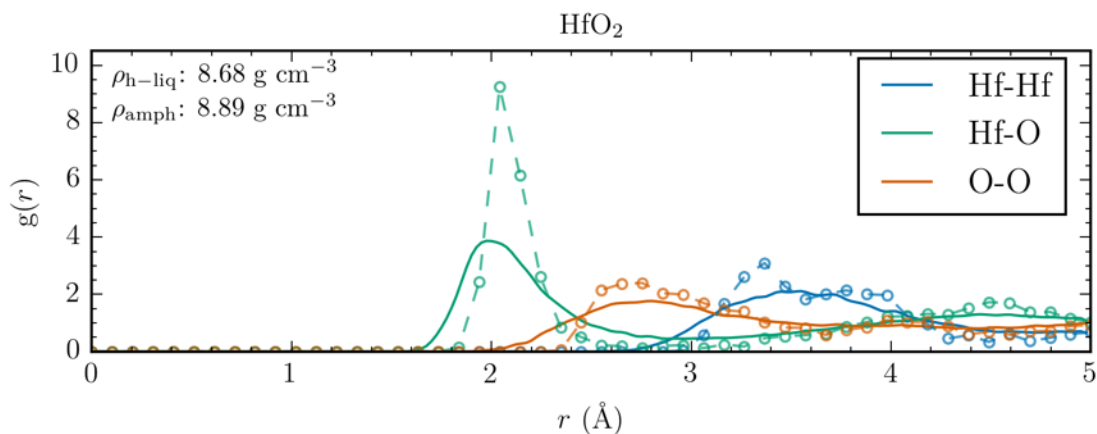

**fig. S18. Radial distribution functions of amorphous configurations.** Partial radial distribution functions of AIMD-generated amorphous HfO<sub>2</sub> and the parent high-temperature hypothetical liquid that amorphous configurations are quenched from.

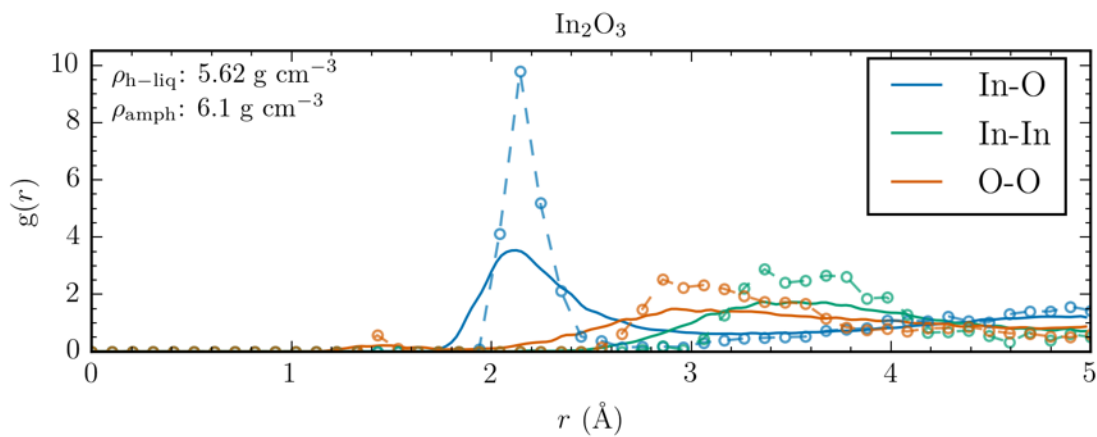

**fig. S19. Radial distribution functions of amorphous configurations.** Partial radial distribution functions of AIMD-generated amorphous In<sub>2</sub>O<sub>3</sub> and the parent high-temperature hypothetical liquid that amorphous configurations are quenched from.

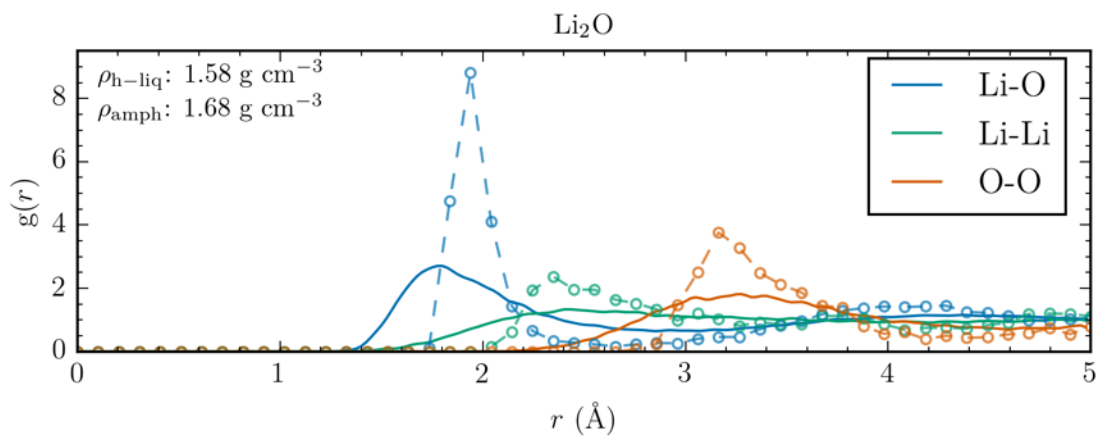

**fig. S20. Radial distribution functions of amorphous configurations.** Partial radial distribution functions of AIMD-generated amorphous  $\text{Li}_2\text{O}$  and the parent high-temperature hypothetical liquid that amorphous configurations are quenched from.

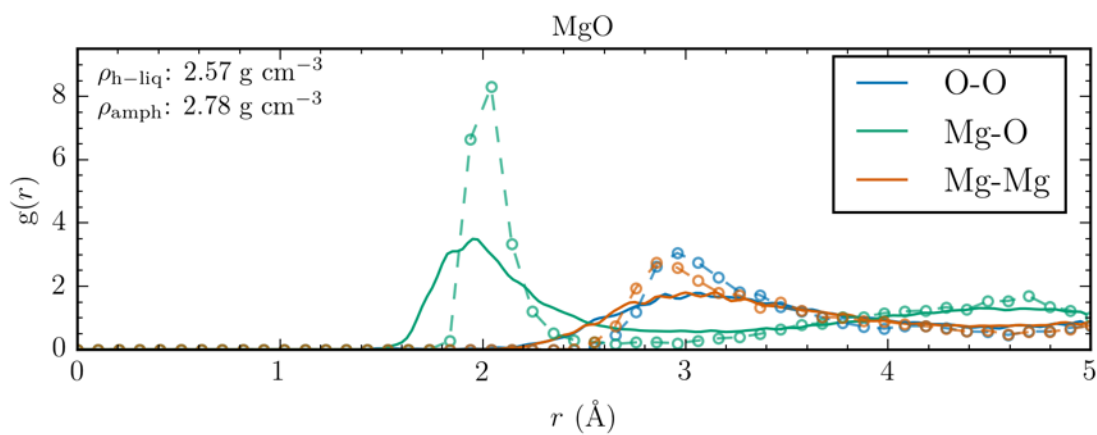

**fig. S21. Radial distribution functions of amorphous configurations.** Partial radial distribution functions of AIMD-generated amorphous  $\text{MgO}$  and the parent high-temperature hypothetical liquid that amorphous configurations are quenched from.

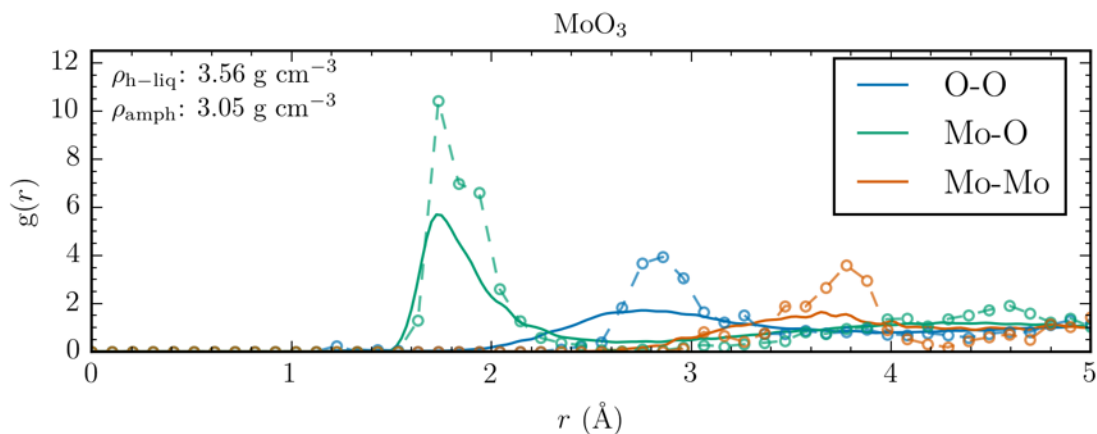

**fig. S22. Radial distribution functions of amorphous configurations.** Partial radial distribution functions of AIMD-generated amorphous B<sub>2</sub>O<sub>3</sub> and the parent high-temperature hypothetical liquid that amorphous configurations are quenched from.

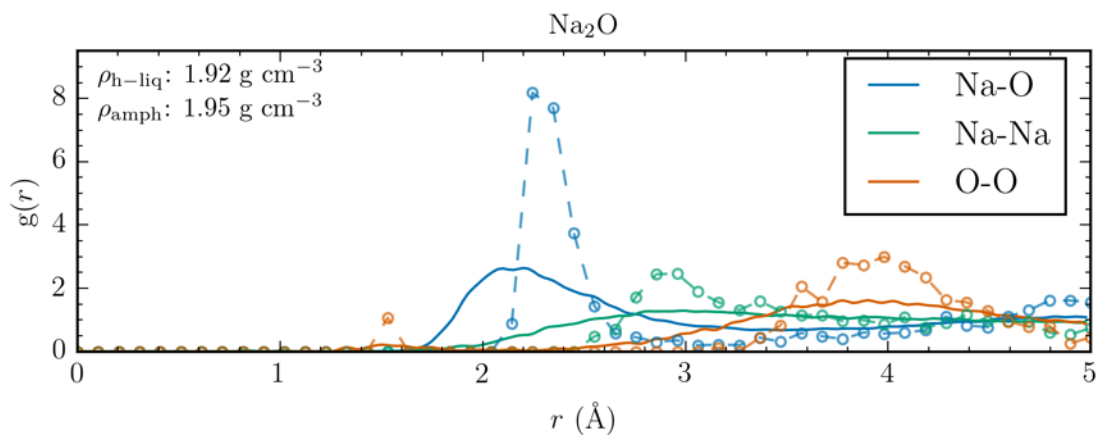

**fig. S23. Radial distribution functions of amorphous configurations.** Partial radial distribution functions of AIMD-generated amorphous Na<sub>2</sub>O and the parent high-temperature hypothetical liquid that amorphous configurations are quenched from.

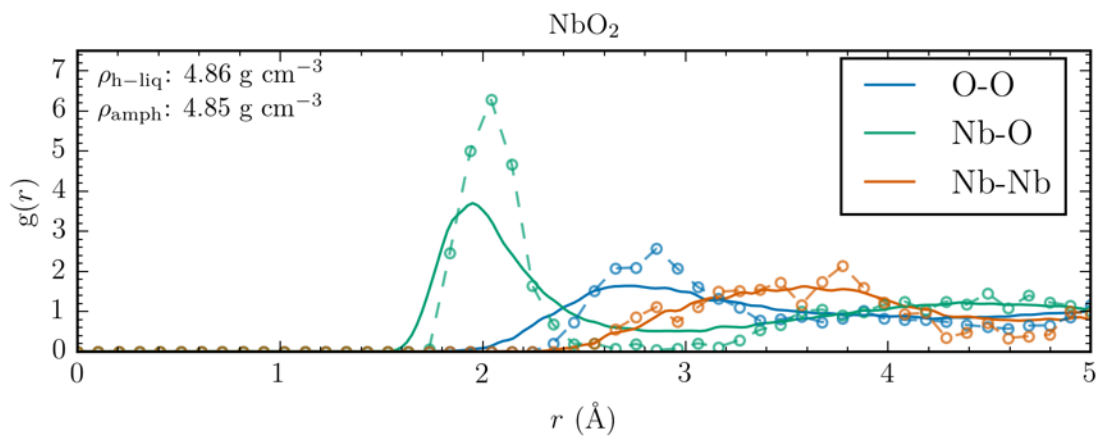

**fig. S24. Radial distribution functions of amorphous configurations.** Partial radial distribution functions of AIMD-generated amorphous NbO<sub>2</sub> and the parent high-temperature hypothetical liquid that amorphous configurations are quenched from.

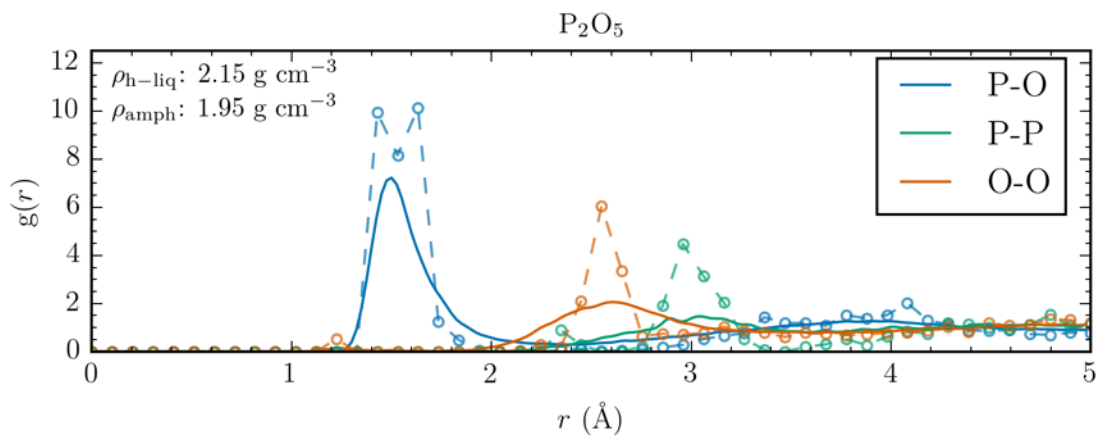

**fig. S25. Radial distribution functions of amorphous configurations.** Partial radial distribution functions of AIMD-generated amorphous P<sub>2</sub>O<sub>5</sub> and the parent high-temperature hypothetical liquid that amorphous configurations are quenched from.

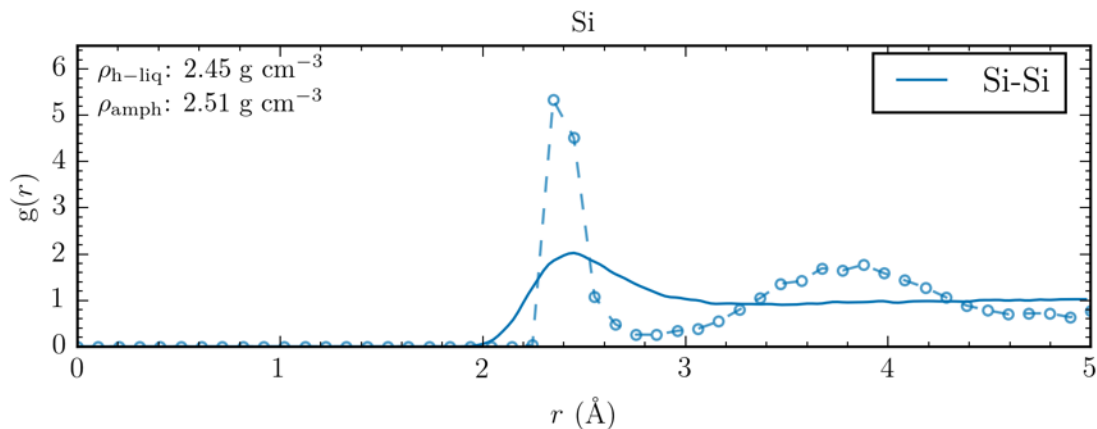

**fig. S26. Radial distribution functions of amorphous configurations.** Partial radial distribution functions of AIMD-generated amorphous Si and the parent high-temperature hypothetical liquid that amorphous configurations are quenched from.

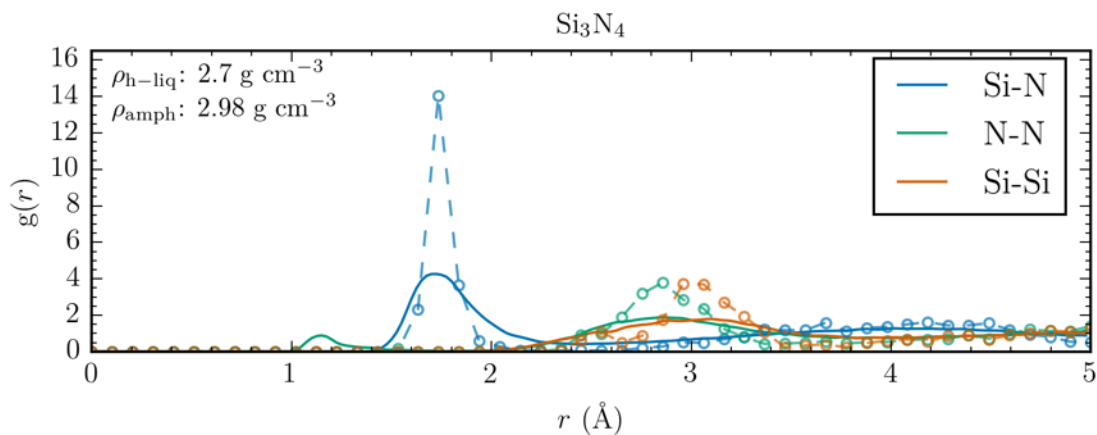

**fig. S27. Radial distribution functions of amorphous configurations.** Partial radial distribution functions of AIMD-generated amorphous  $\text{Si}_3\text{N}_4$  and the parent high-temperature hypothetical liquid that amorphous configurations are quenched from.

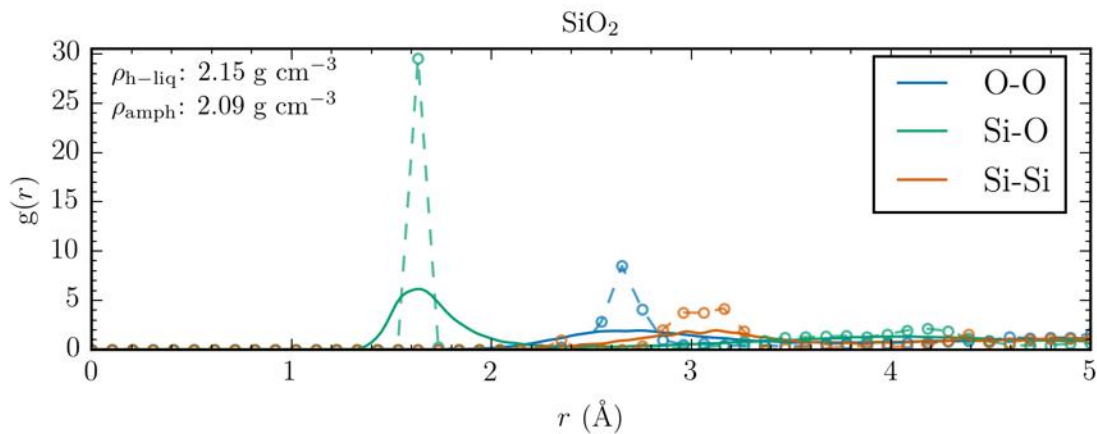

**fig. S28. Radial distribution functions of amorphous configurations.** Partial radial distribution functions of AIMD-generated amorphous SiO<sub>2</sub> and the parent high-temperature hypothetical liquid that amorphous configurations are quenched from.

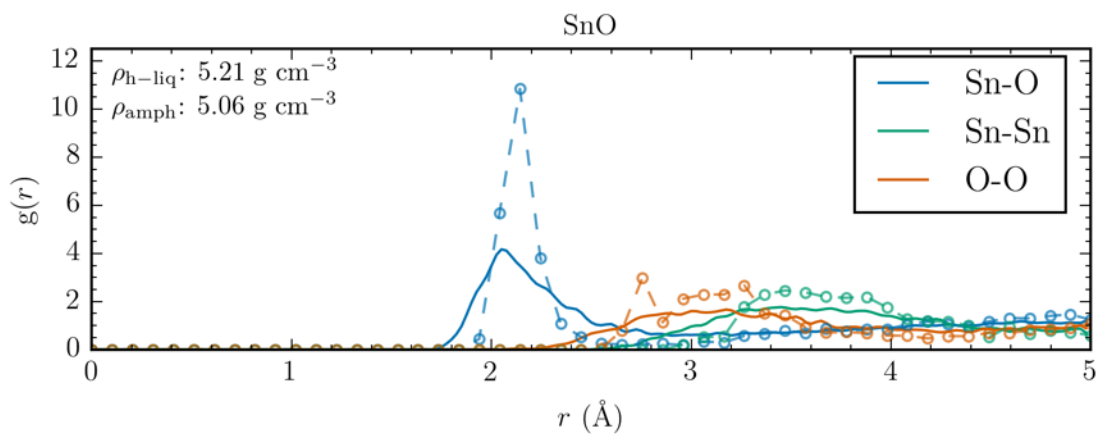

**fig. S29. Radial distribution functions of amorphous configurations.** Partial radial distribution functions of AIMD-generated amorphous SnO and the parent high-temperature hypothetical liquid that amorphous configurations are quenched from.



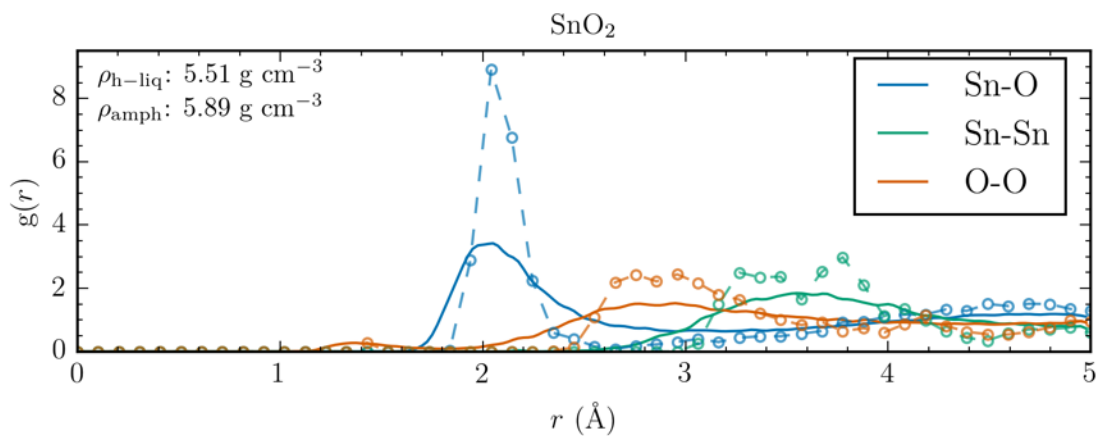

**fig. S30. Radial distribution functions of amorphous configurations.** Partial radial distribution functions of AIMD-generated amorphous SnO<sub>2</sub> and the parent high-temperature hypothetical liquid that amorphous configurations are quenched from.

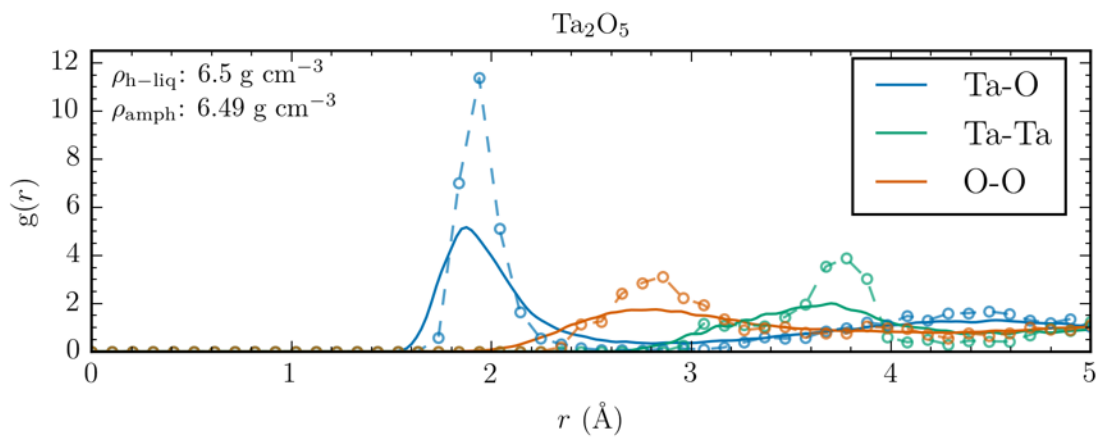

**fig. S31. Radial distribution functions of amorphous configurations.** Partial radial distribution functions of AIMD-generated amorphous Ta<sub>2</sub>O<sub>5</sub> and the parent high-temperature hypothetical liquid that amorphous configurations are quenched from.

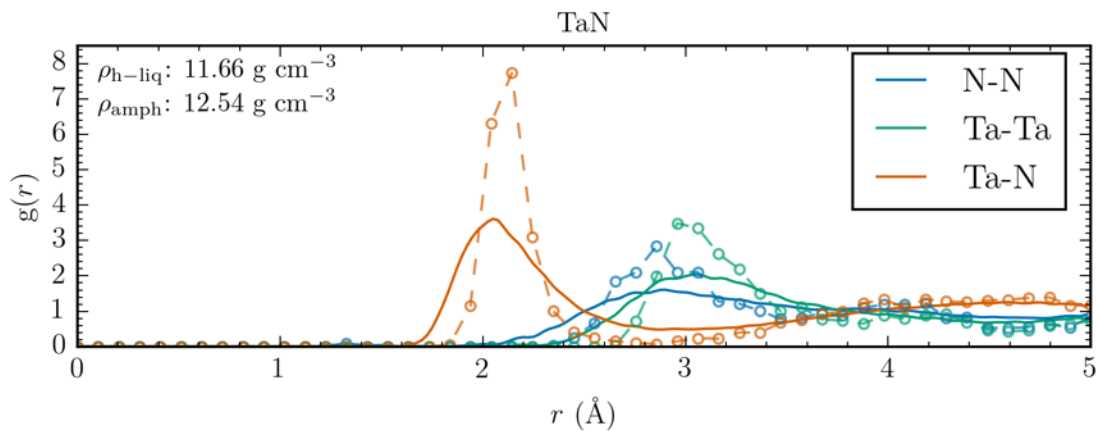

**fig. S32. Radial distribution functions of amorphous configurations.** Partial radial distribution functions of AIMD-generated amorphous TaN and the parent high-temperature hypothetical liquid that amorphous configurations are quenched from.

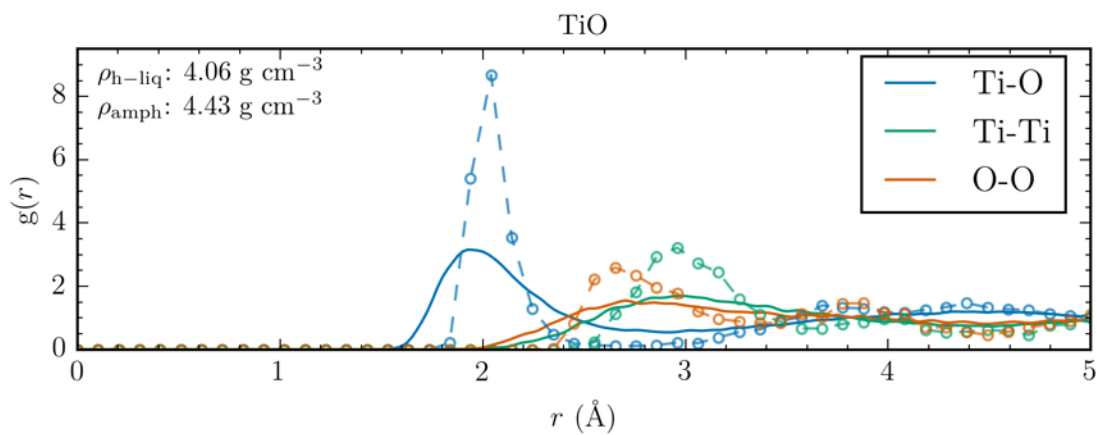

**fig. S33. Radial distribution functions of amorphous configurations.** Partial radial distribution functions of AIMD-generated amorphous TiO and the parent high-temperature hypothetical liquid that amorphous configurations are quenched from.

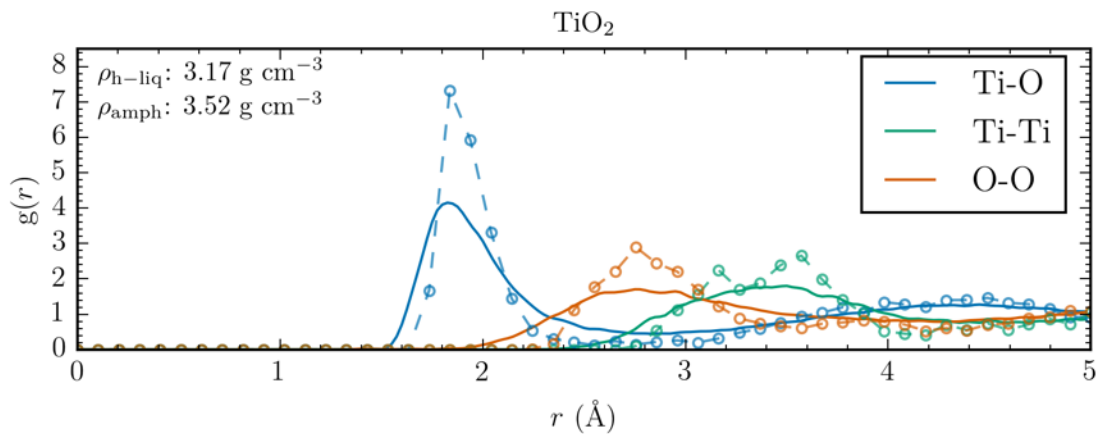

**fig. S34. Radial distribution functions of amorphous configurations.** Partial radial distribution functions of AIMD-generated amorphous TiO<sub>2</sub> and the parent high-temperature hypothetical liquid that amorphous configurations are quenched from.

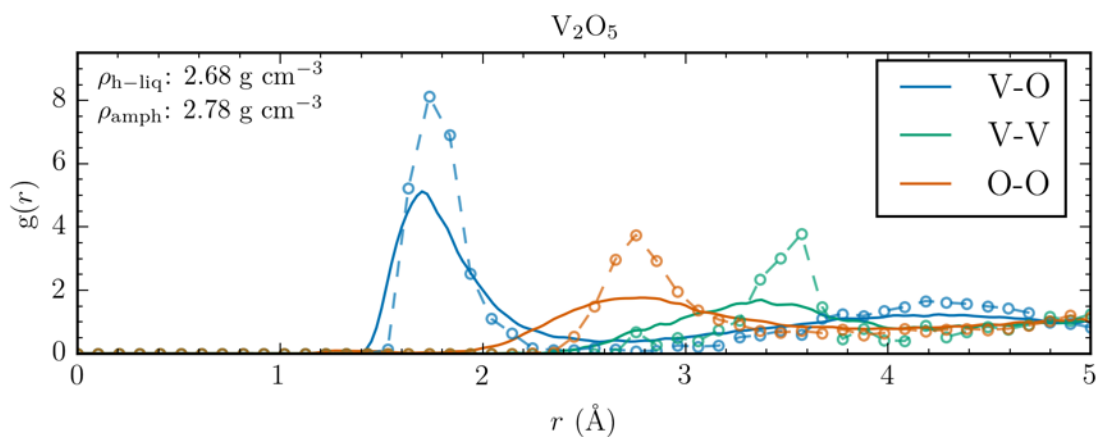

**fig. S35. Radial distribution functions of amorphous configurations.** Partial radial distribution functions of AIMD-generated amorphous V<sub>2</sub>O<sub>5</sub> and the parent high-temperature hypothetical liquid that amorphous configurations are quenched from.

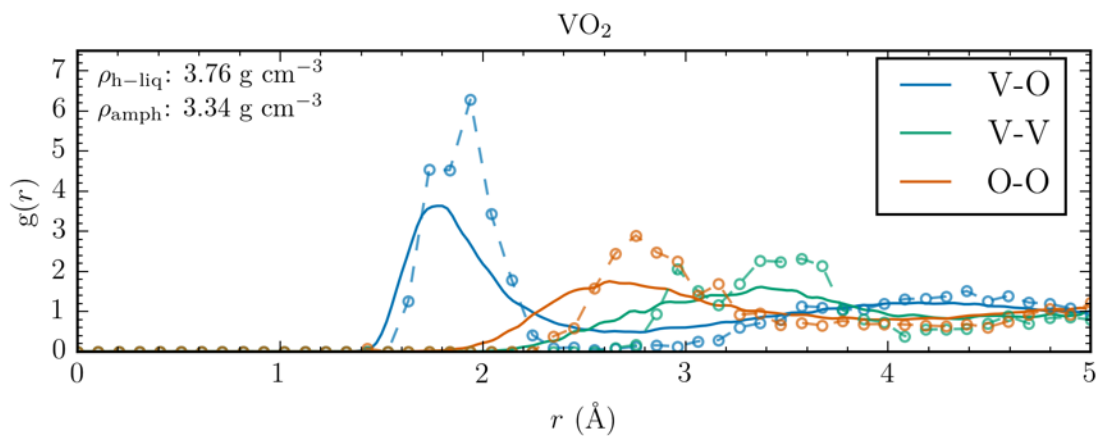

**fig. S36. Radial distribution functions of amorphous configurations.** Partial radial distribution functions of AIMD-generated amorphous VO<sub>2</sub> and the parent high-temperature hypothetical liquid that amorphous configurations are quenched from.

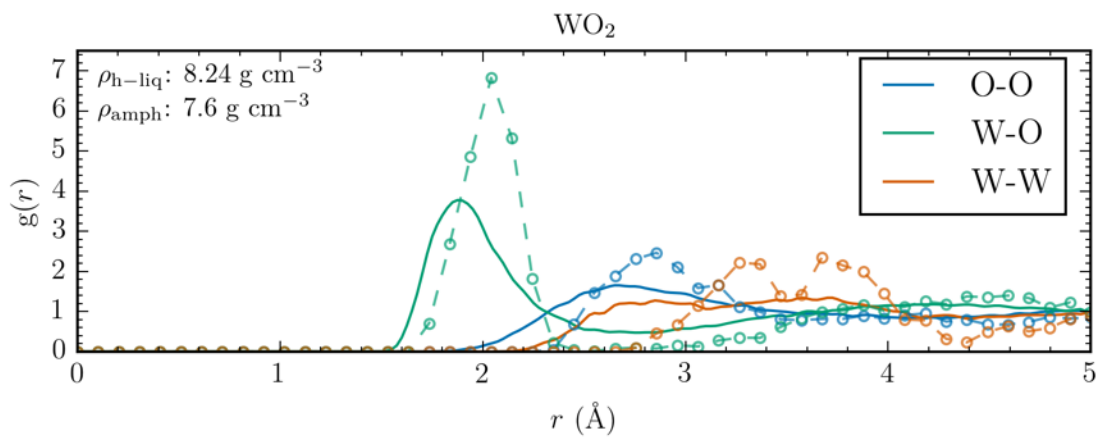

**fig. S37. Radial distribution functions of amorphous configurations.** Partial radial distribution functions of AIMD-generated amorphous WO<sub>2</sub> and the parent high-temperature hypothetical liquid that amorphous configurations are quenched from.

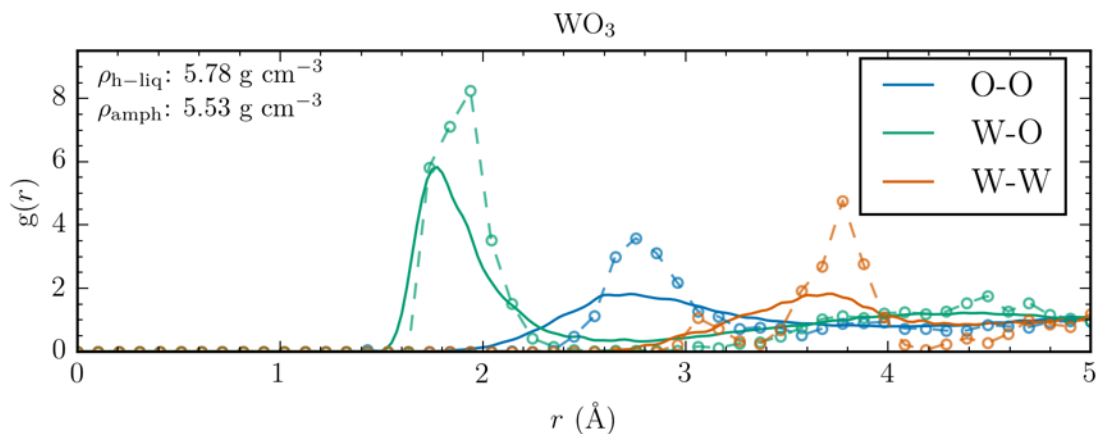

**fig. S38. Radial distribution functions of amorphous configurations.** Partial radial distribution functions of AIMD-generated amorphous  $\text{WO}_3$  and the parent high-temperature hypothetical liquid that amorphous configurations are quenched from.

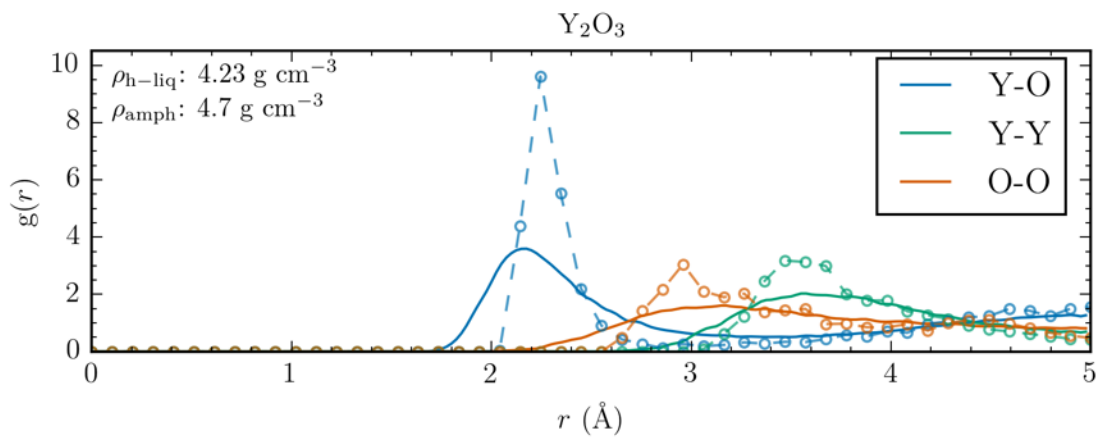

**fig. S39. Radial distribution functions of amorphous configurations.** Partial radial distribution functions of AIMD-generated amorphous  $\text{Y}_2\text{O}_3$  and the parent high-temperature hypothetical liquid that amorphous configurations are quenched from.

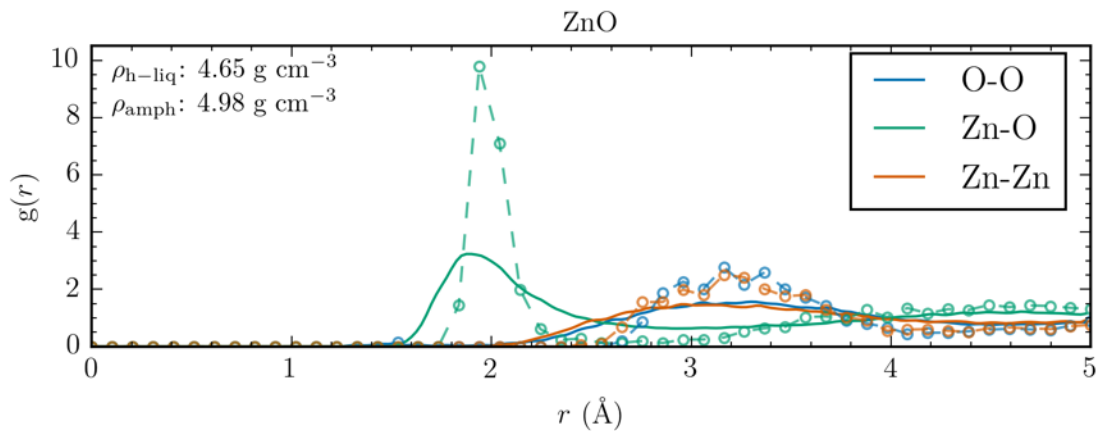

**fig. S40. Radial distribution functions of amorphous configurations.** Partial radial distribution functions of AIMD-generated amorphous ZnO and the parent high-temperature hypothetical liquid that amorphous configurations are quenched from.

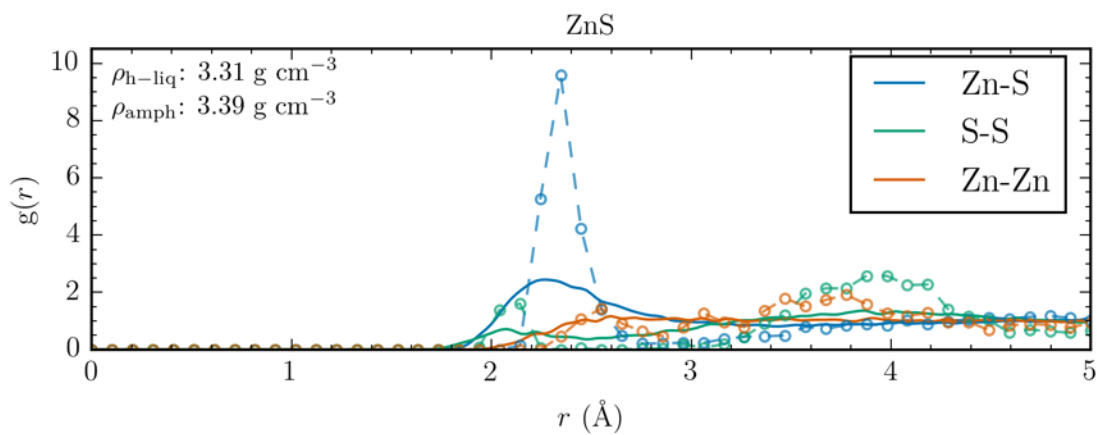

**fig. S41. Radial distribution functions of amorphous configurations.** Partial radial distribution functions of AIMD-generated amorphous ZnS and the parent high-temperature hypothetical liquid that amorphous configurations are quenched from.

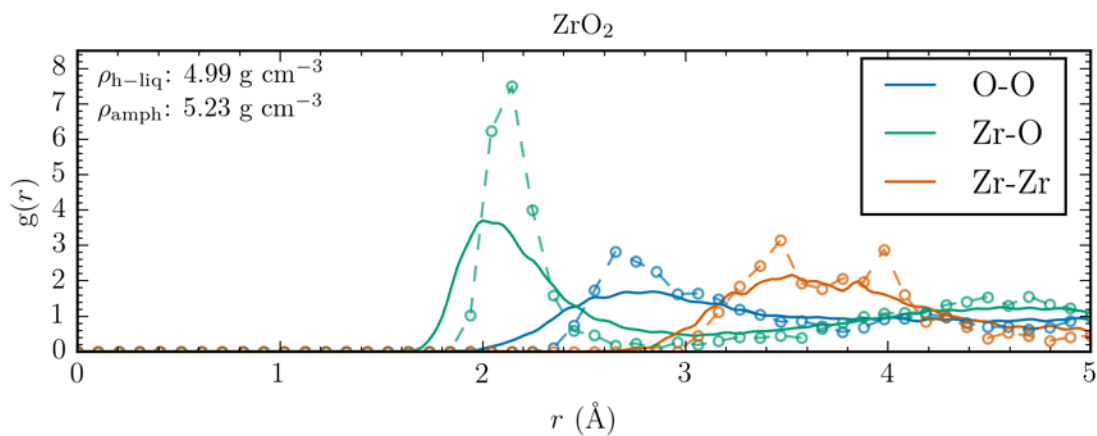

**fig. S42. Radial distribution functions of amorphous configurations.** Partial radial distribution functions of AIMD-generated amorphous  $\text{ZrO}_2$  and the parent high-temperature hypothetical liquid that amorphous configurations are quenched from.

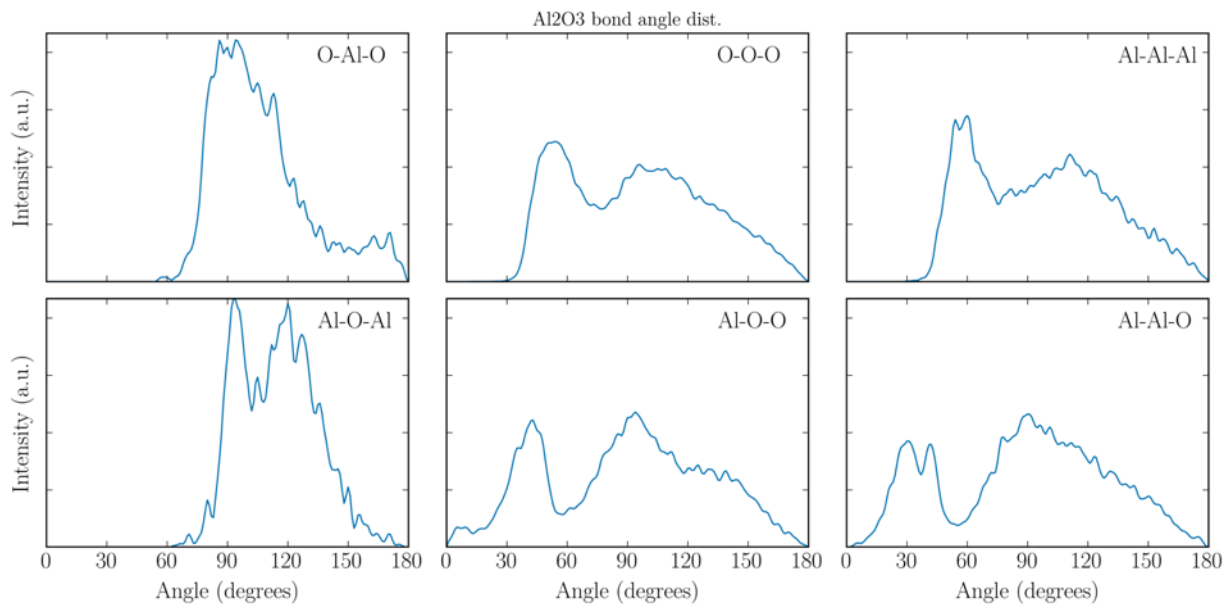

**fig. S43. Bond-angle distribution functions of amorphous configurations.** Bond angle distribution functions of AIMD-generated amorphous  $\text{Al}_2\text{O}_3$ .

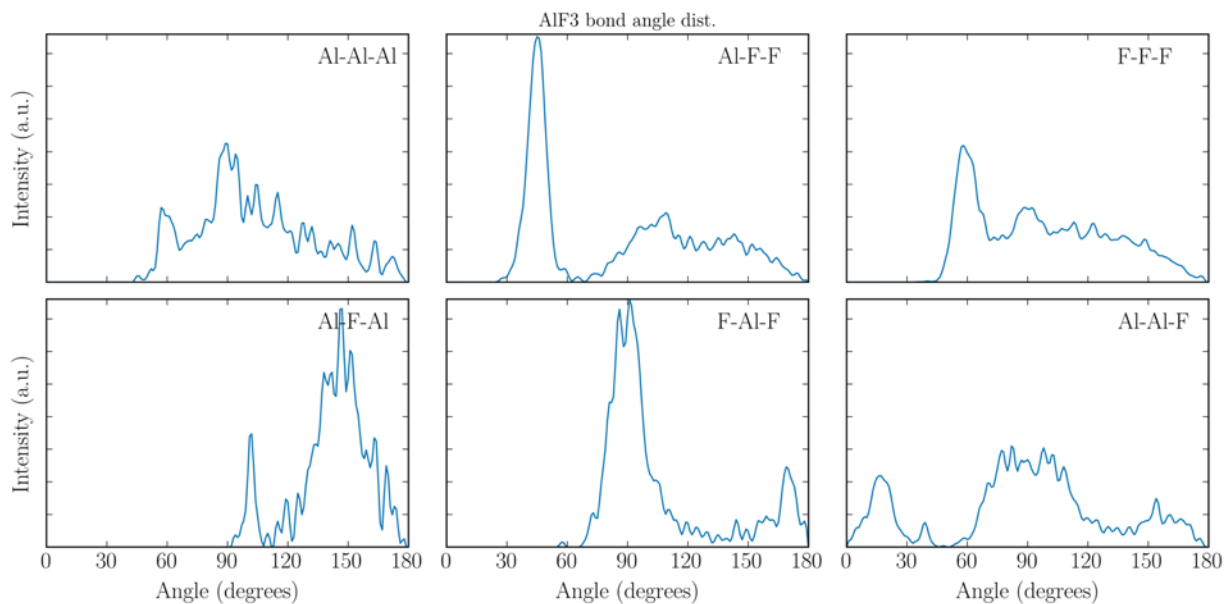

**fig. S44. Bond-angle distribution functions of amorphous configurations.** Bond angle distribution functions of AIMD-generated amorphous  $\text{AlF}_3$ .



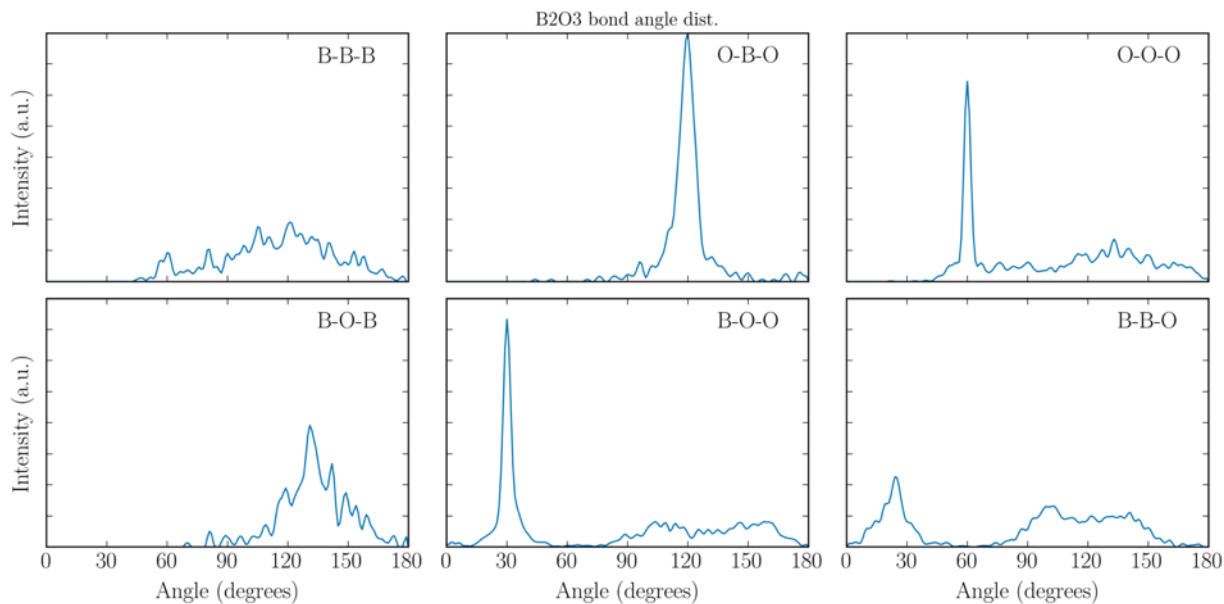

**fig. S45. Bond-angle distribution functions of amorphous configurations.** Bond angle distribution functions of AIMD-generated amorphous  $B_2O_3$ .

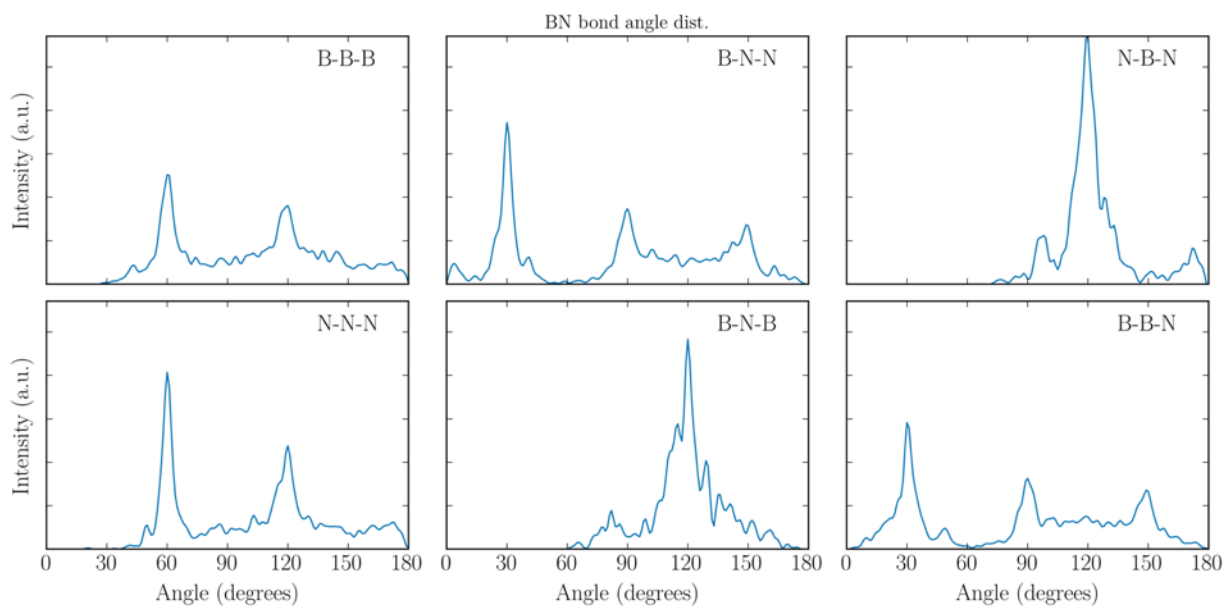

**fig. S46. Bond-angle distribution functions of amorphous configurations.** Bond angle distribution functions of AIMD-generated amorphous BN.

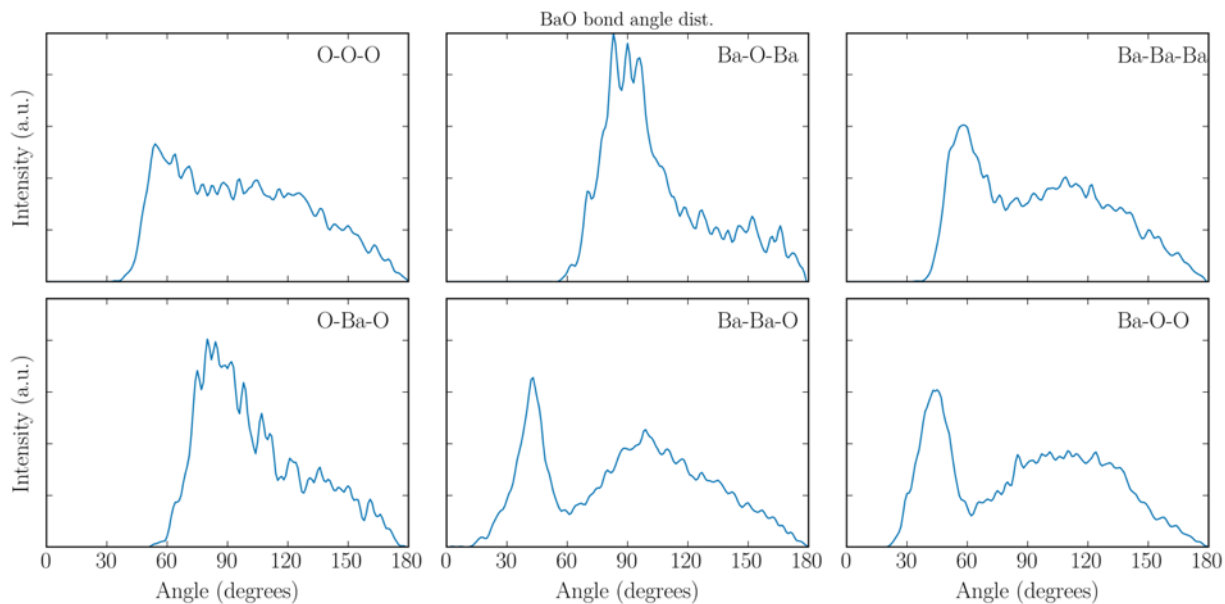

**fig. S47. Bond-angle distribution functions of amorphous configurations.** Bond angle distribution functions of AIMD-generated amorphous BaO.

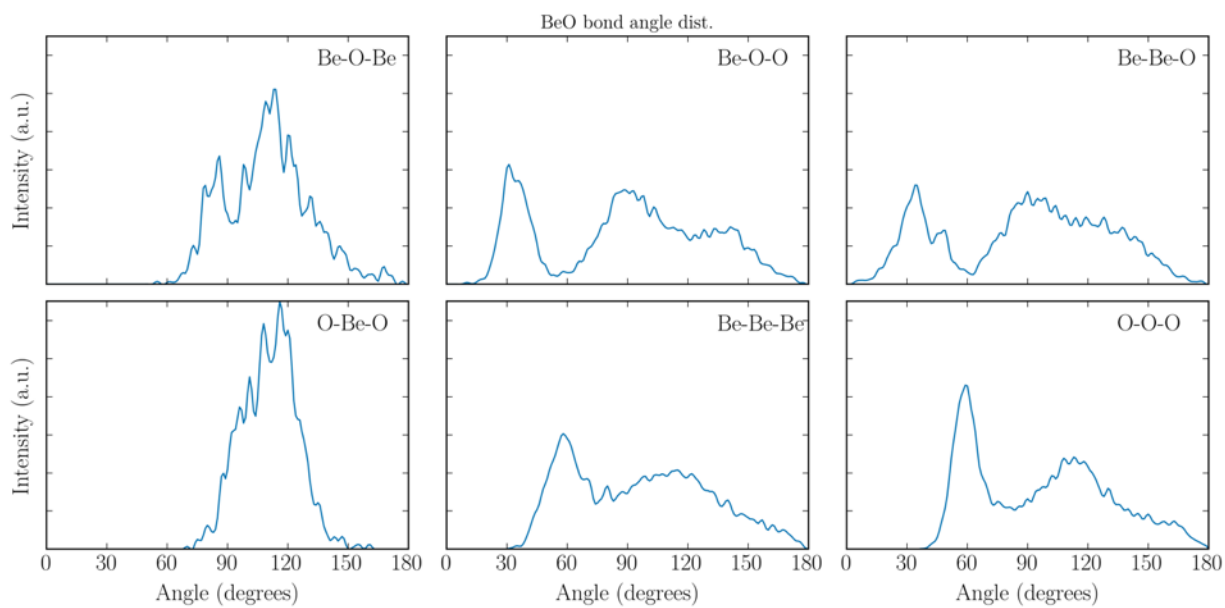

**fig. S48. Bond-angle distribution functions of amorphous configurations.** Bond angle distribution functions of AIMD-generated amorphous BeO.

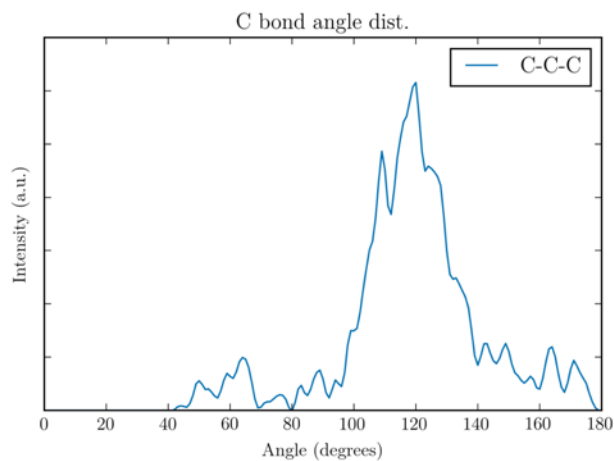

**fig. S49. Bond-angle distribution functions of amorphous configurations.** Bond angle distribution function of AIMD-generated amorphous C.

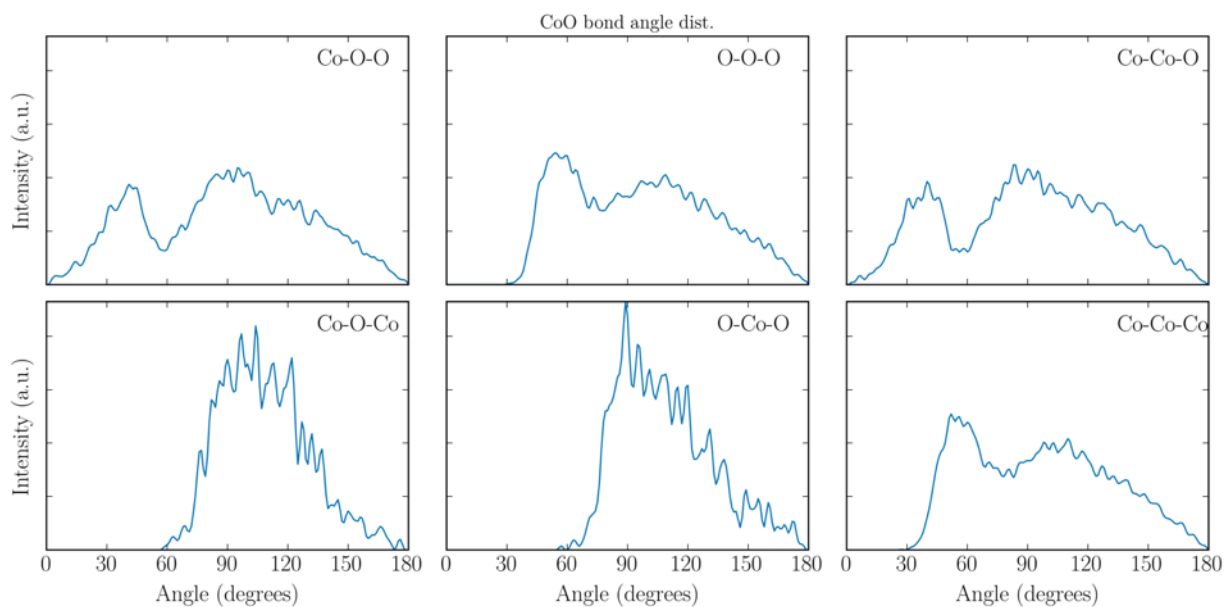

**fig. S50. Bond-angle distribution functions of amorphous configurations.** Bond angle distribution functions of AIMD-generated amorphous CoO.

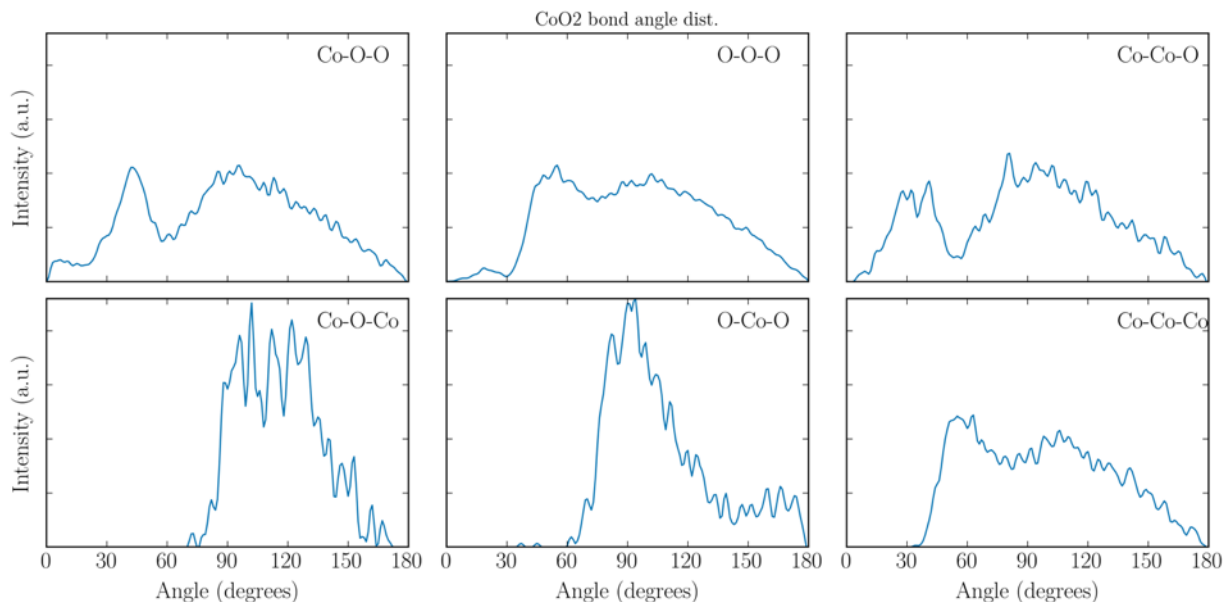

**fig. S51. Bond-angle distribution functions of amorphous configurations.** Bond angle distribution functions of AIMD-generated amorphous  $\text{CoO}_2$ .

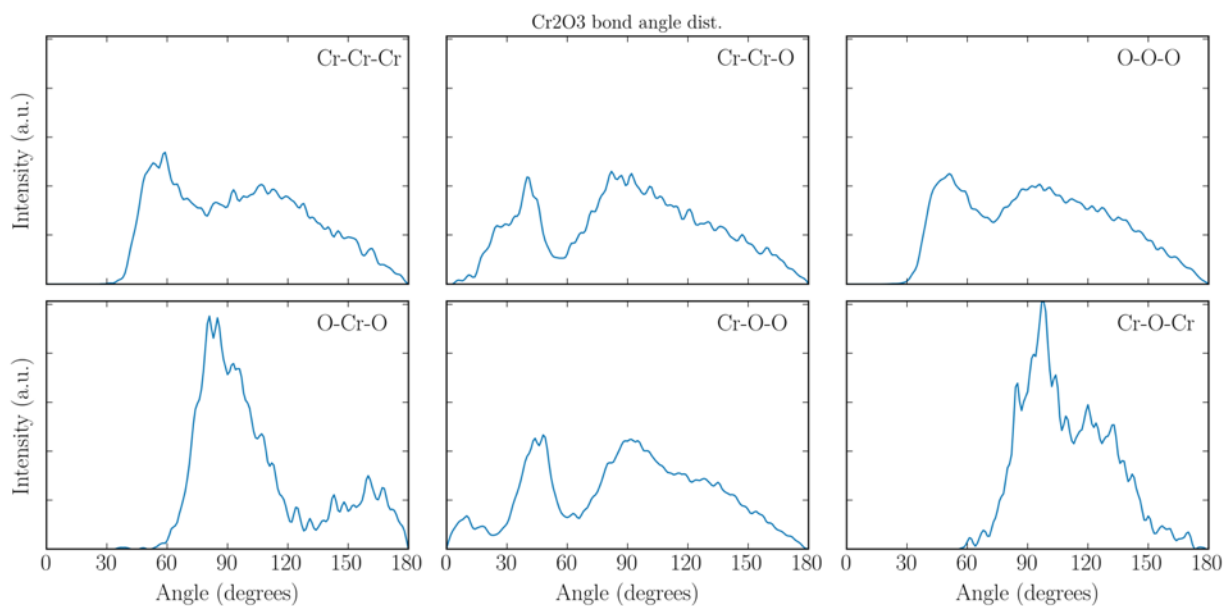

**fig. S52. Bond-angle distribution functions of amorphous configurations.** Bond angle distribution functions of AIMD-generated amorphous  $\text{Cr}_2\text{O}_3$ .

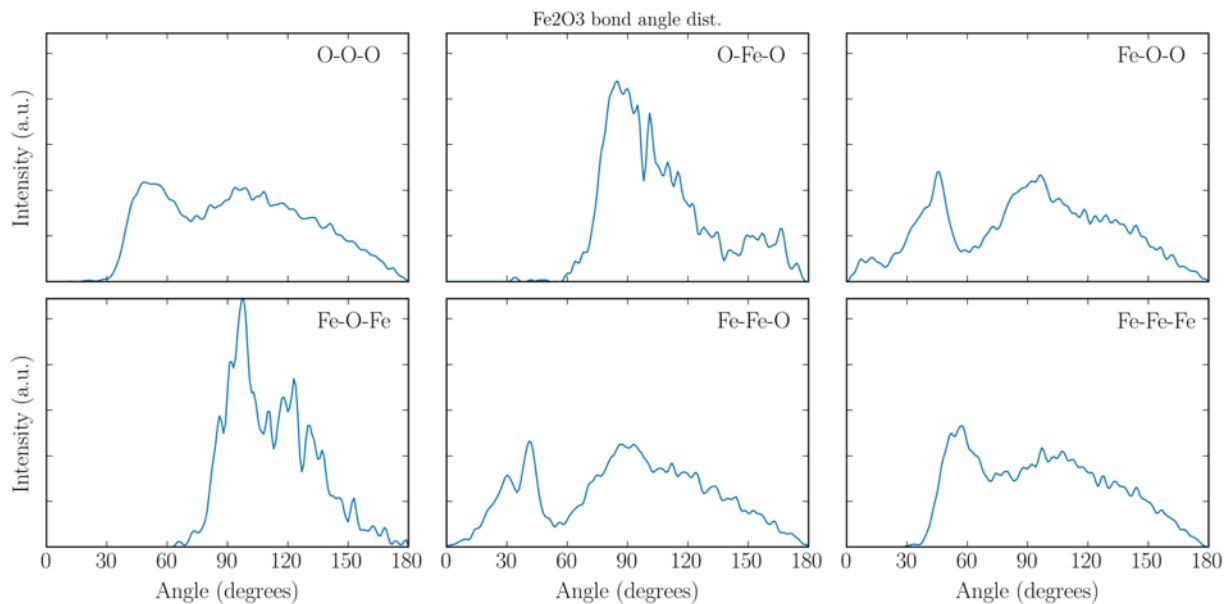

**fig. S53. Bond-angle distribution functions of amorphous configurations.** Bond angle distribution functions of AIMD-generated amorphous  $\text{Fe}_2\text{O}_3$ .

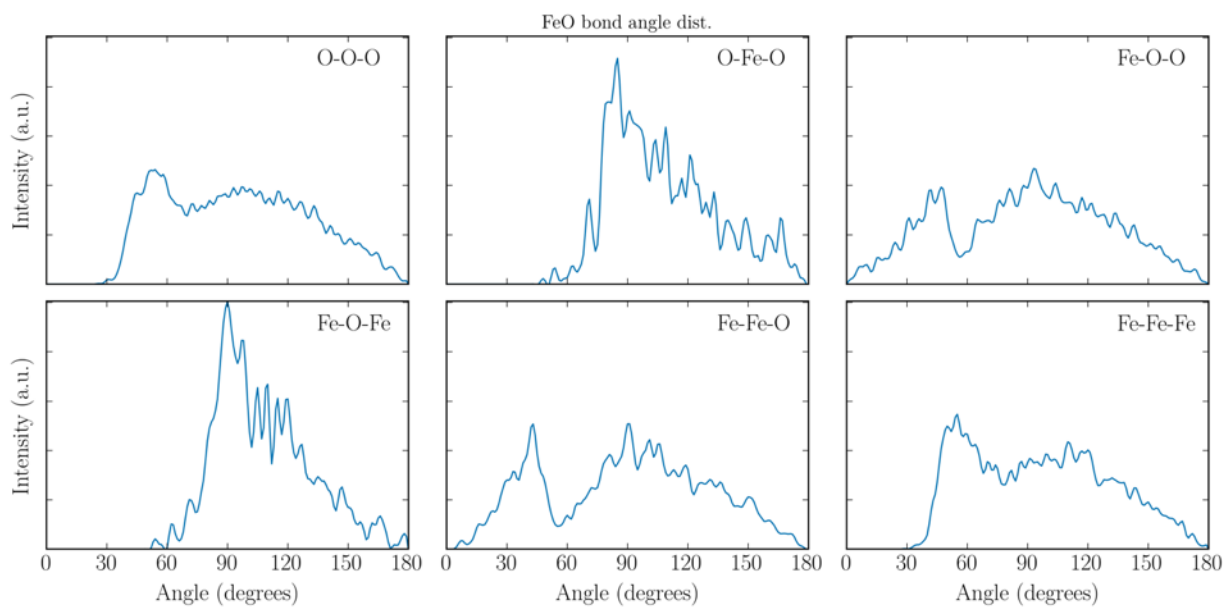

**fig. S54. Bond-angle distribution functions of amorphous configurations.** Bond angle distribution functions of AIMD-generated amorphous  $\text{FeO}$ .

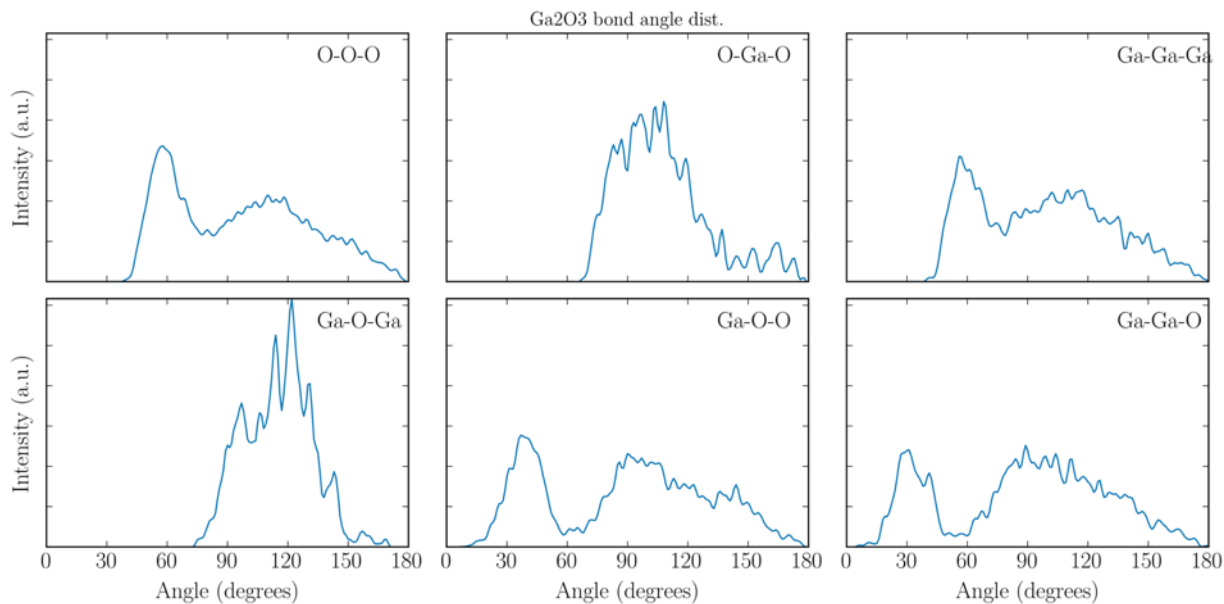

**fig. S55. Bond-angle distribution functions of amorphous configurations.** Bond angle distribution functions of AIMD-generated amorphous Ga<sub>2</sub>O<sub>3</sub>.

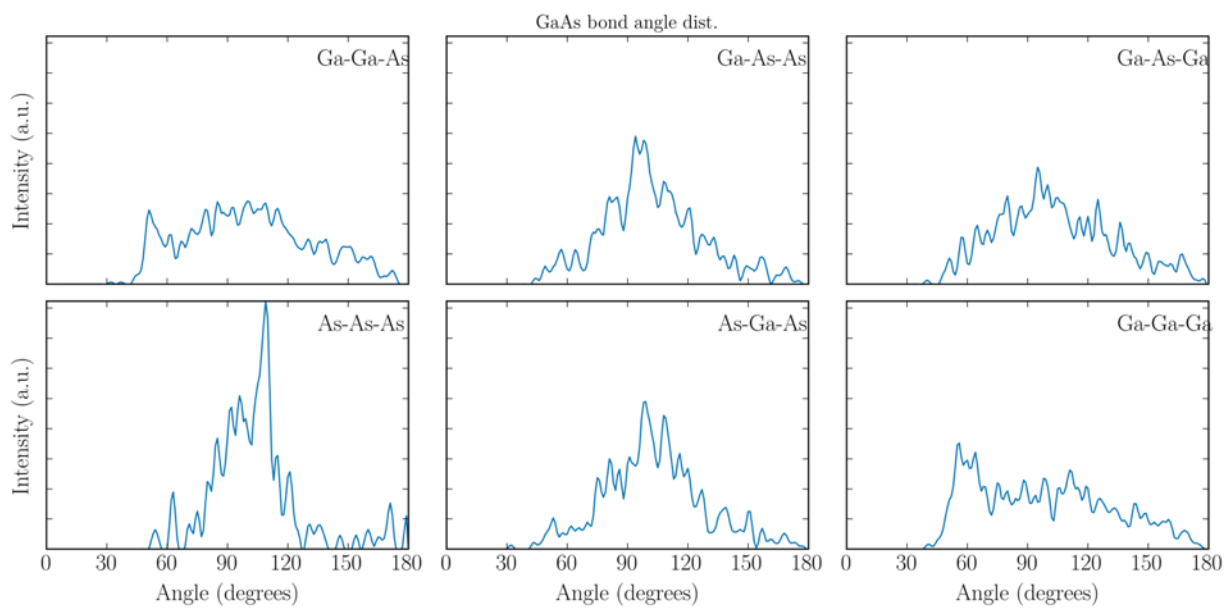

**fig. S56. Bond-angle distribution functions of amorphous configurations.** Bond angle distribution functions of AIMD-generated amorphous GaAs.

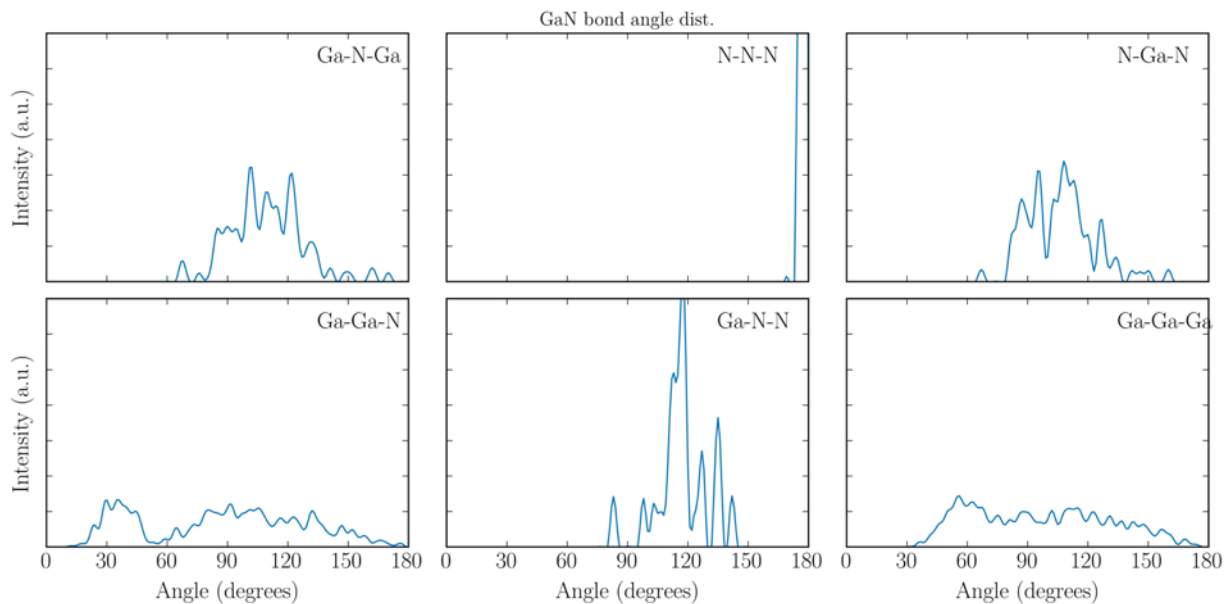

**fig. S57. Bond-angle distribution functions of amorphous configurations.** Bond angle distribution functions of AIMD-generated amorphous GaN.

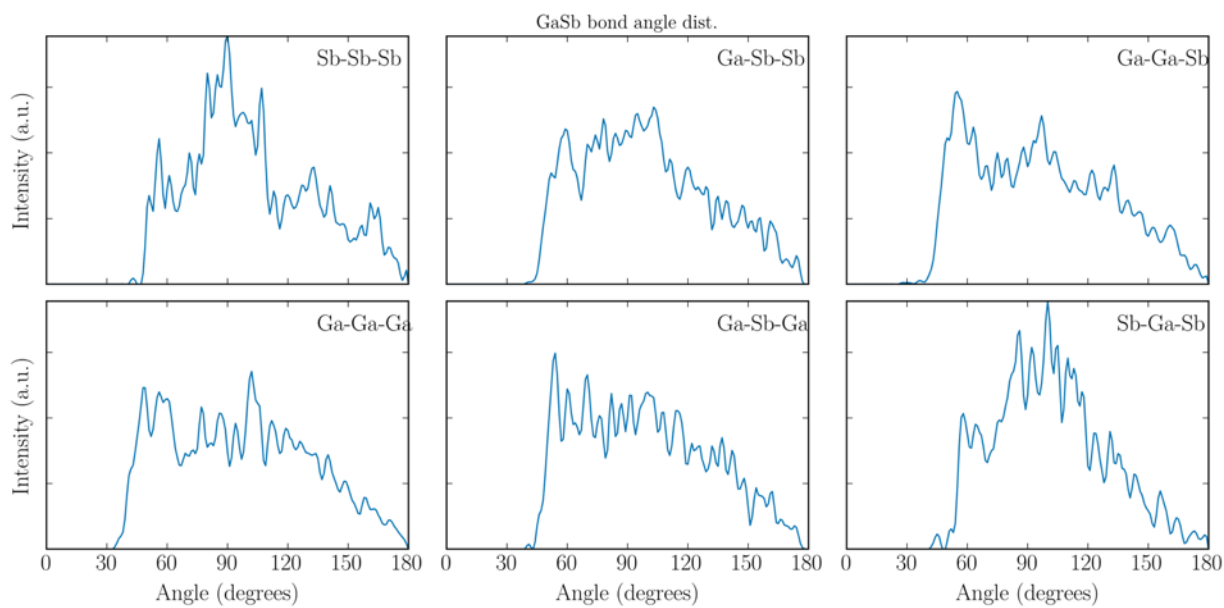

**fig. S58. Bond-angle distribution functions of amorphous configurations.** Bond angle distribution functions of AIMD-generated amorphous GaSb.

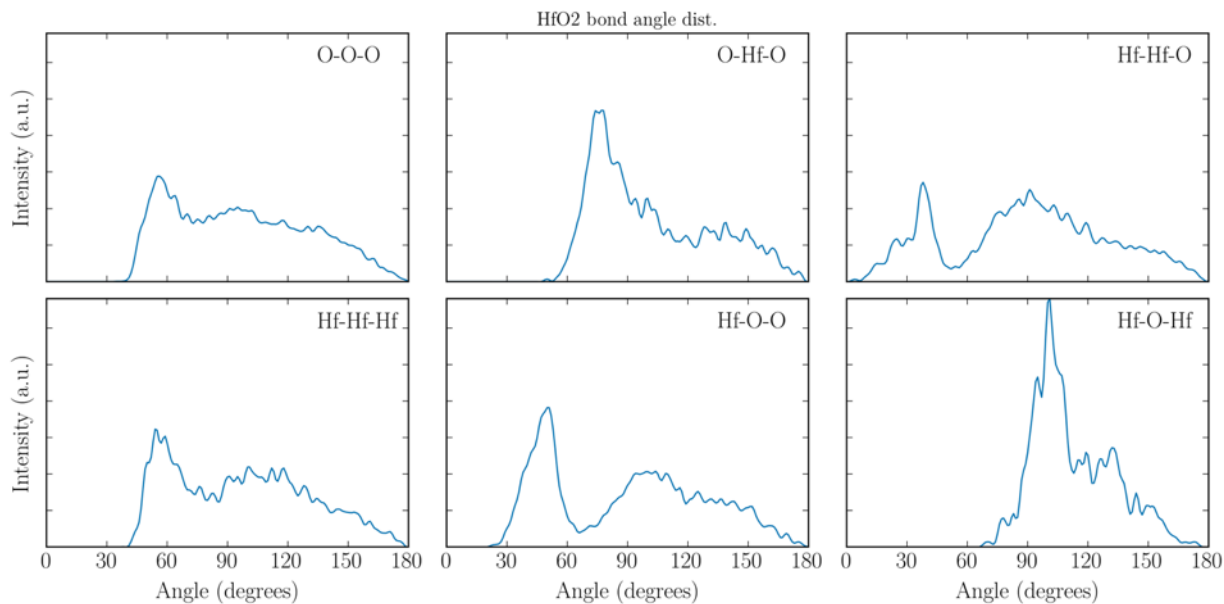

**fig. S59. Bond-angle distribution functions of amorphous configurations.** Bond angle distribution functions of AIMD-generated amorphous HfO<sub>2</sub>.

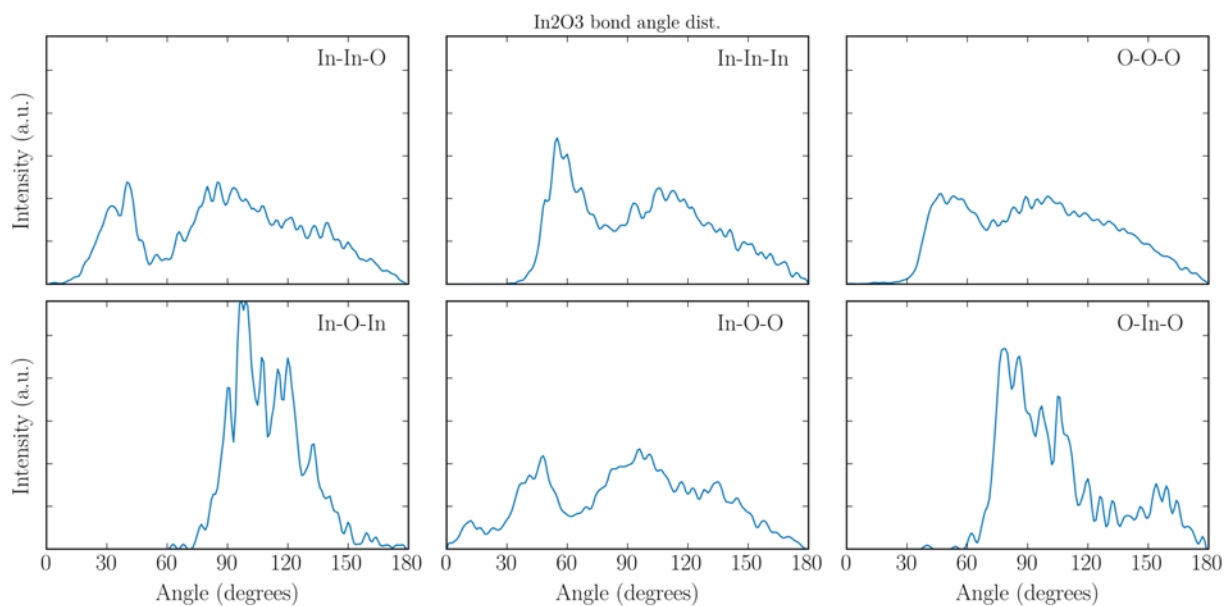

**fig. S60. Bond-angle distribution functions of amorphous configurations.** Bond angle distribution functions of AIMD-generated amorphous In<sub>2</sub>O<sub>3</sub>.



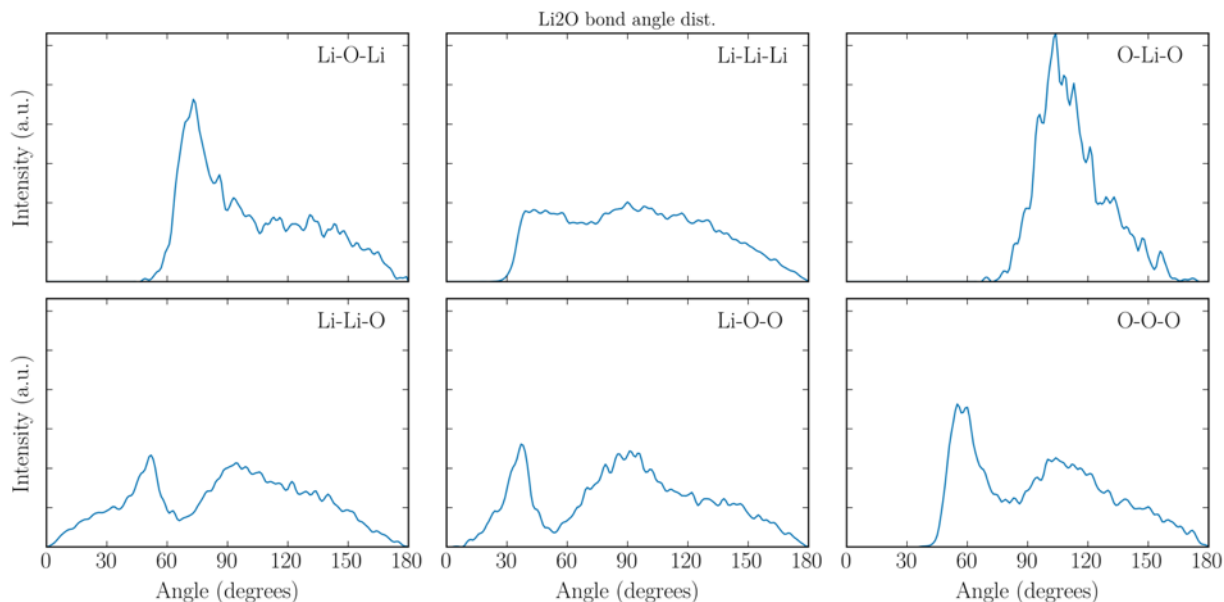

**fig. S61. Bond-angle distribution functions of amorphous configurations.** Bond angle distribution functions of AIMD-generated amorphous Li<sub>2</sub>O.

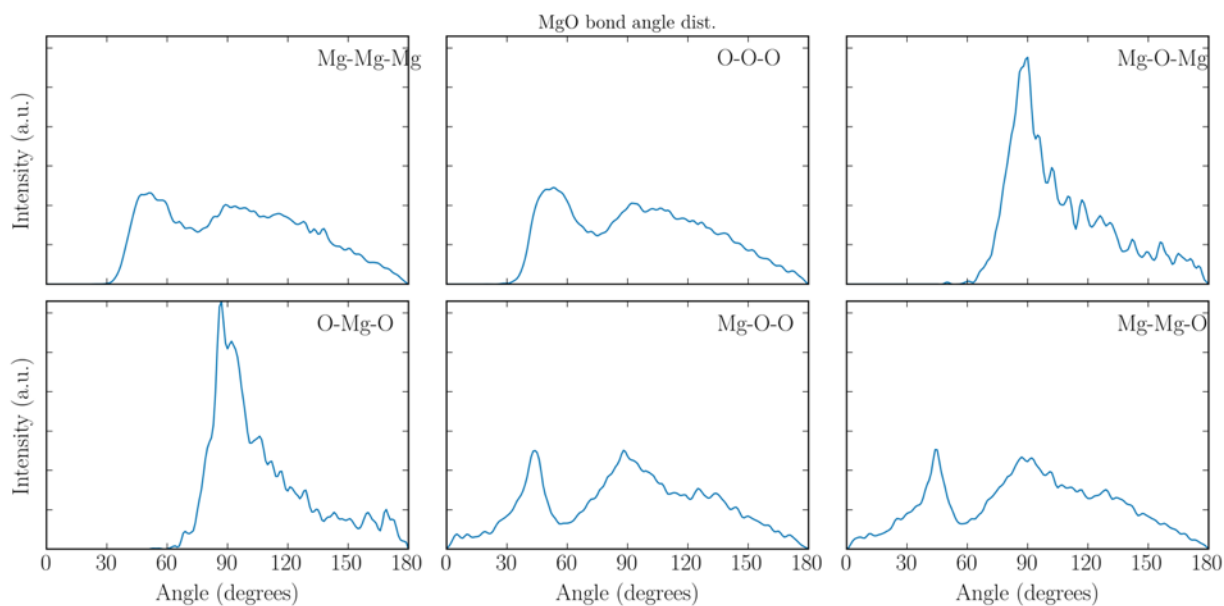

**fig. S62. Bond-angle distribution functions of amorphous configurations.** Bond angle distribution functions of AIMD-generated amorphous MgO.

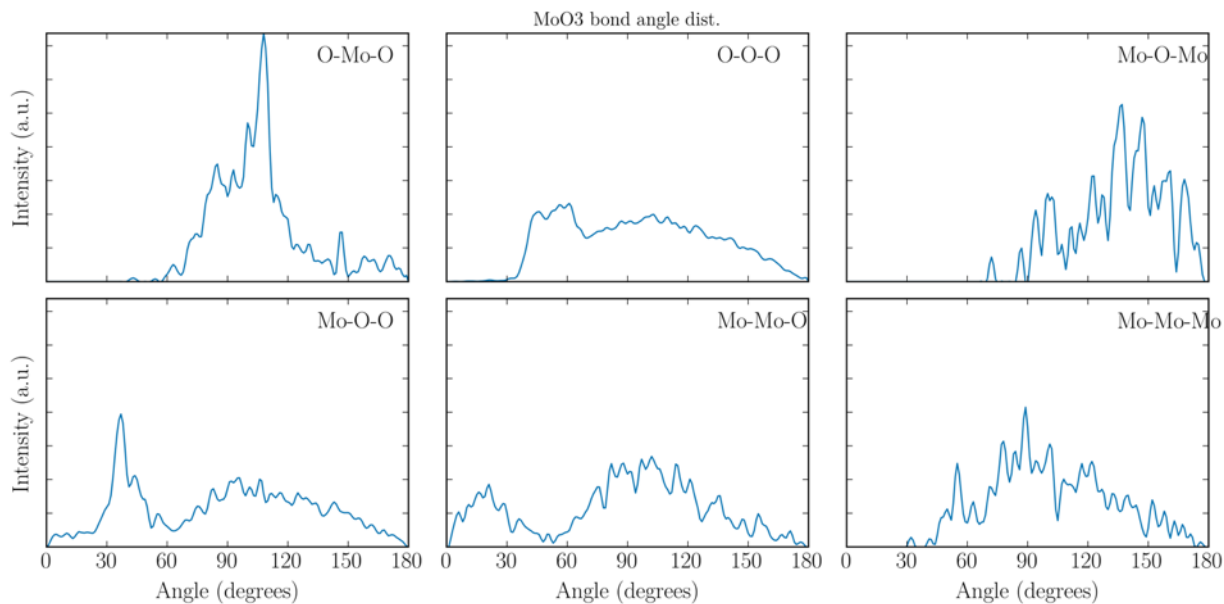

**fig. S63. Bond-angle distribution functions of amorphous configurations.** Bond angle distribution functions of AIMD-generated amorphous MoO<sub>3</sub>.

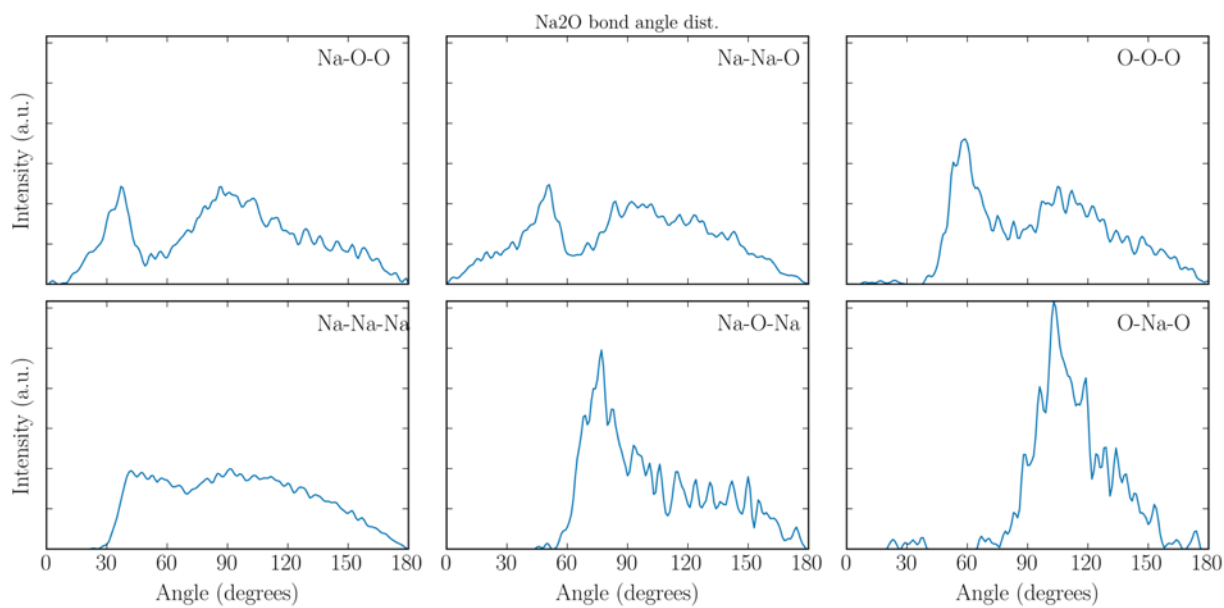

**fig. S64. Bond-angle distribution functions of amorphous configurations.** Bond angle distribution functions of AIMD-generated amorphous Na<sub>2</sub>O.

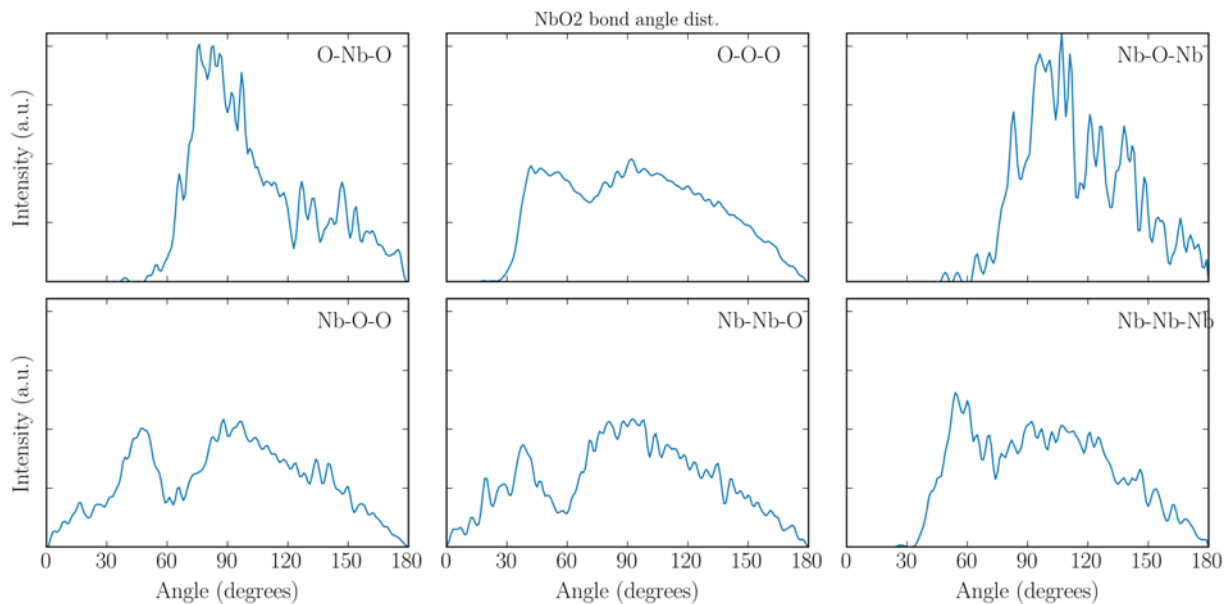

**fig. S65. Bond-angle distribution functions of amorphous configurations.** Bond angle distribution functions of AIMD-generated amorphous NbO<sub>2</sub>.

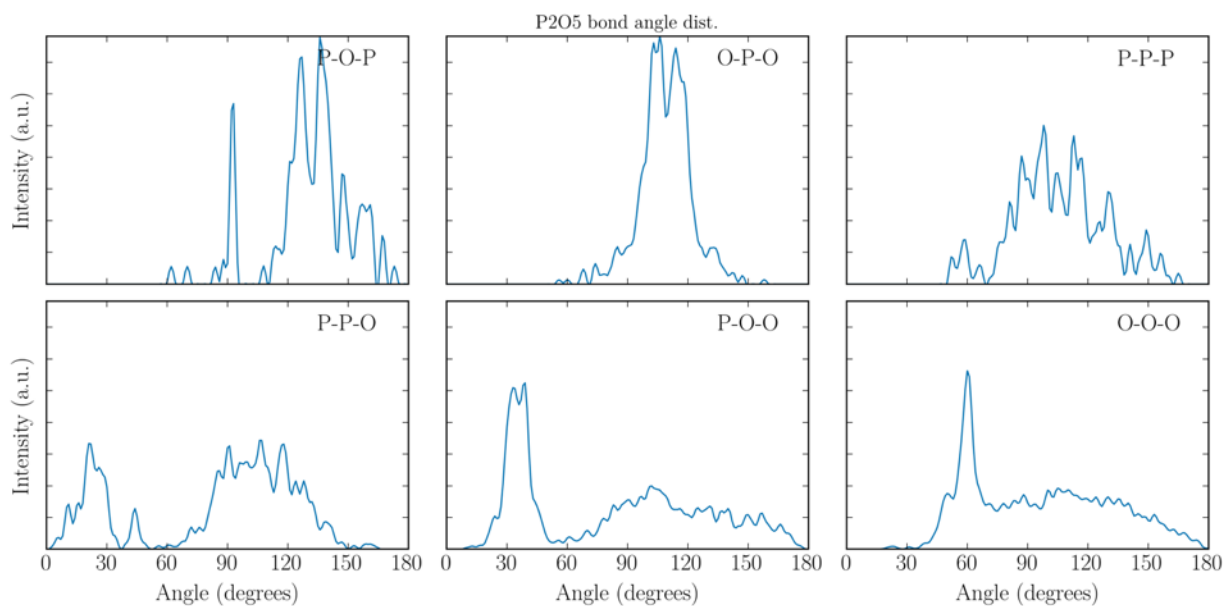

**fig. S66. Bond-angle distribution functions of amorphous configurations.** Bond angle distribution functions of AIMD-generated amorphous P<sub>2</sub>O<sub>5</sub>.

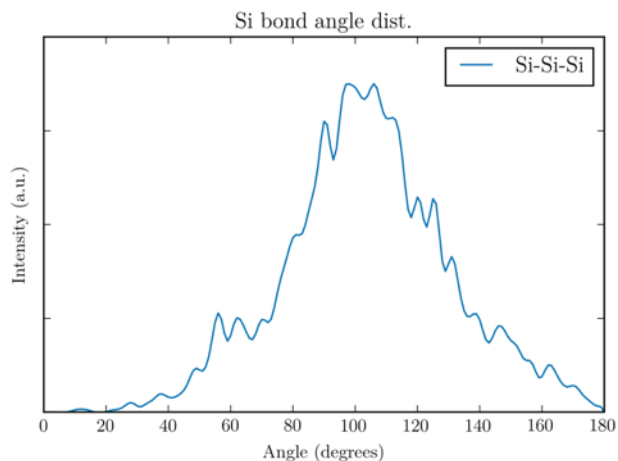

**fig. S67. Bond-angle distribution functions of amorphous configurations.** Bond angle distribution function of AIMD-generated amorphous Si.

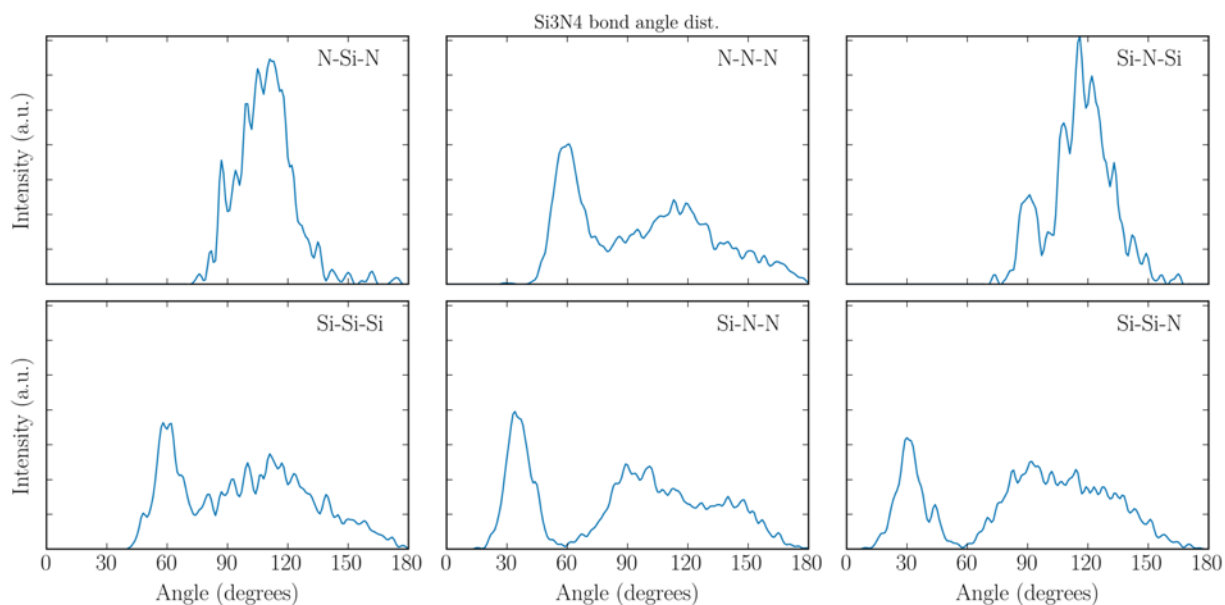

**fig. S68. Bond-angle distribution functions of amorphous configurations.** Bond angle distribution functions of AIMD-generated amorphous Si<sub>3</sub>N<sub>4</sub>.

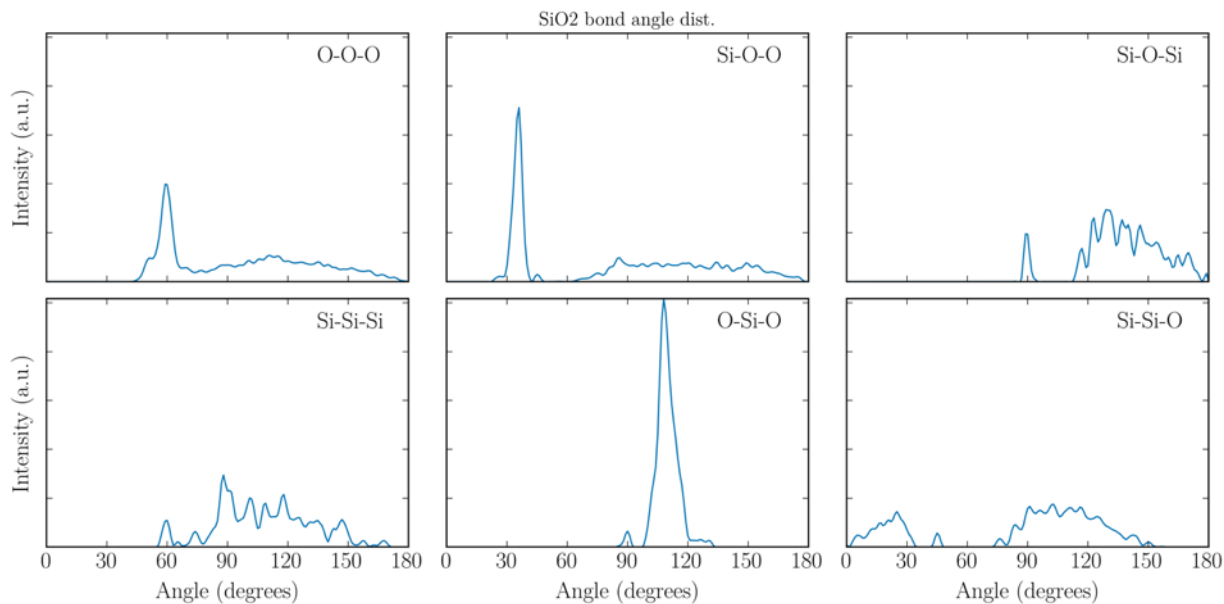

**fig. S69. Bond-angle distribution functions of amorphous configurations.** Bond angle distribution functions of AIMD-generated amorphous  $\text{SiO}_2$ .

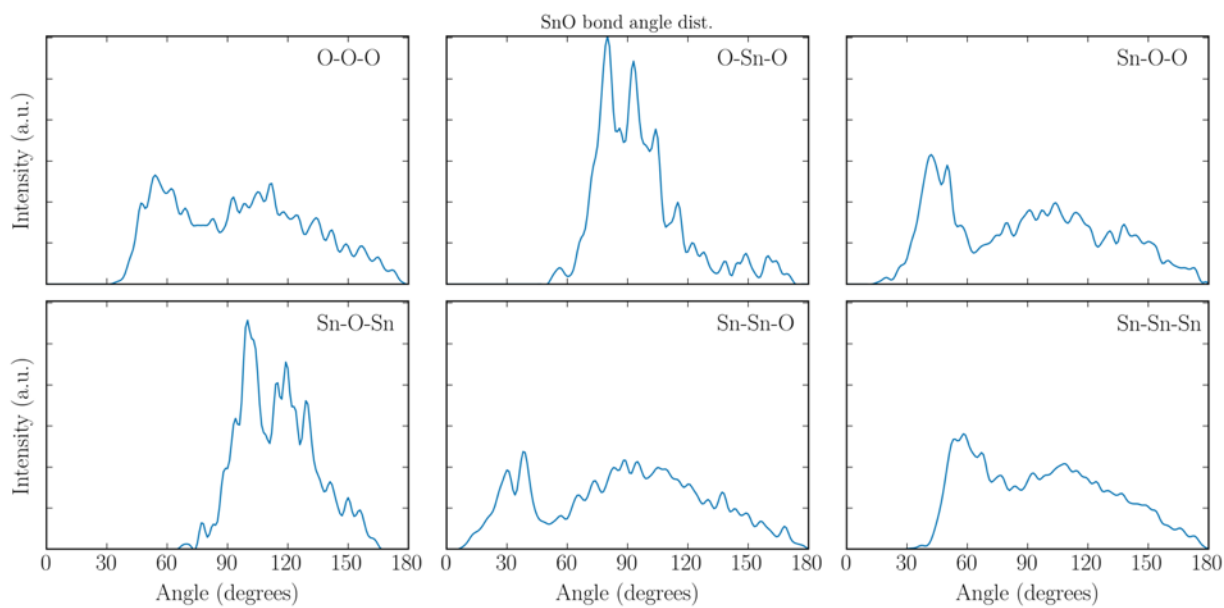

**fig. S70. Bond-angle distribution functions of amorphous configurations.** Bond angle distribution functions of AIMD-generated amorphous  $\text{SnO}$ .

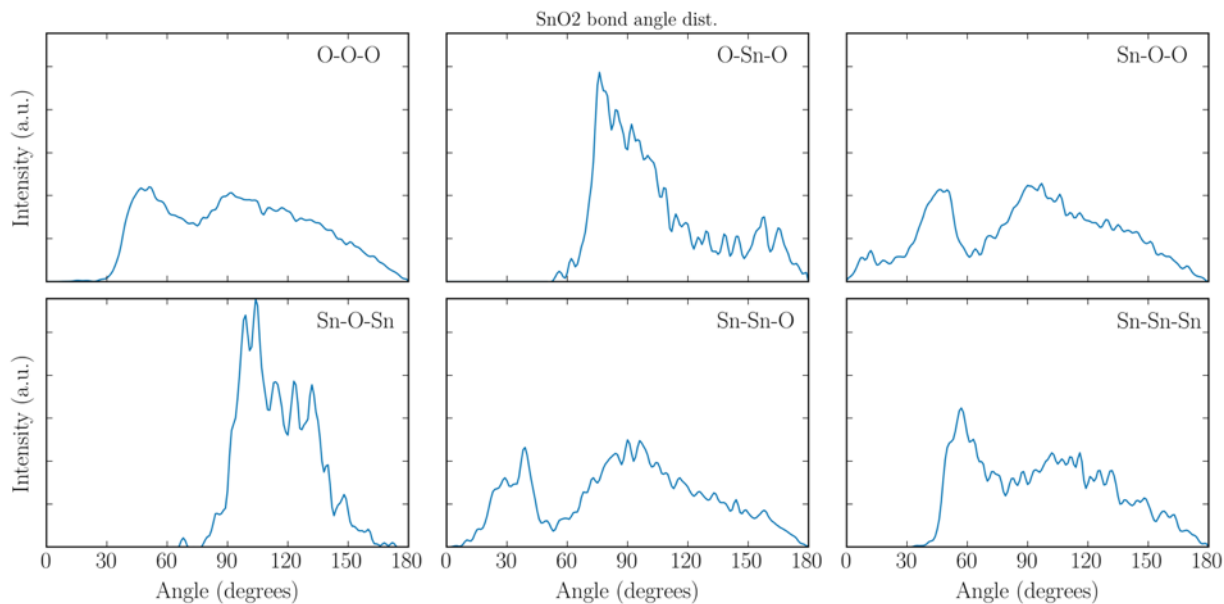

**fig. S71. Bond-angle distribution functions of amorphous configurations.** Bond angle distribution functions of AIMD-generated amorphous  $\text{SnO}_2$ .

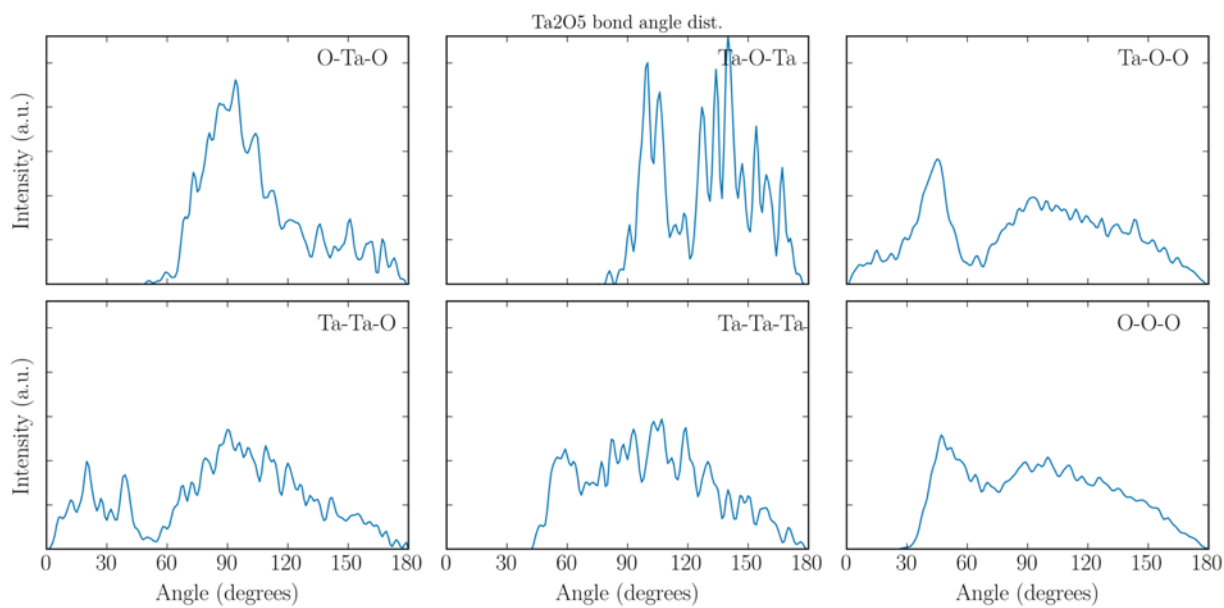

**fig. S72. Bond-angle distribution functions of amorphous configurations.** Bond angle distribution functions of AIMD-generated amorphous  $\text{Ta}_2\text{O}_5$ .

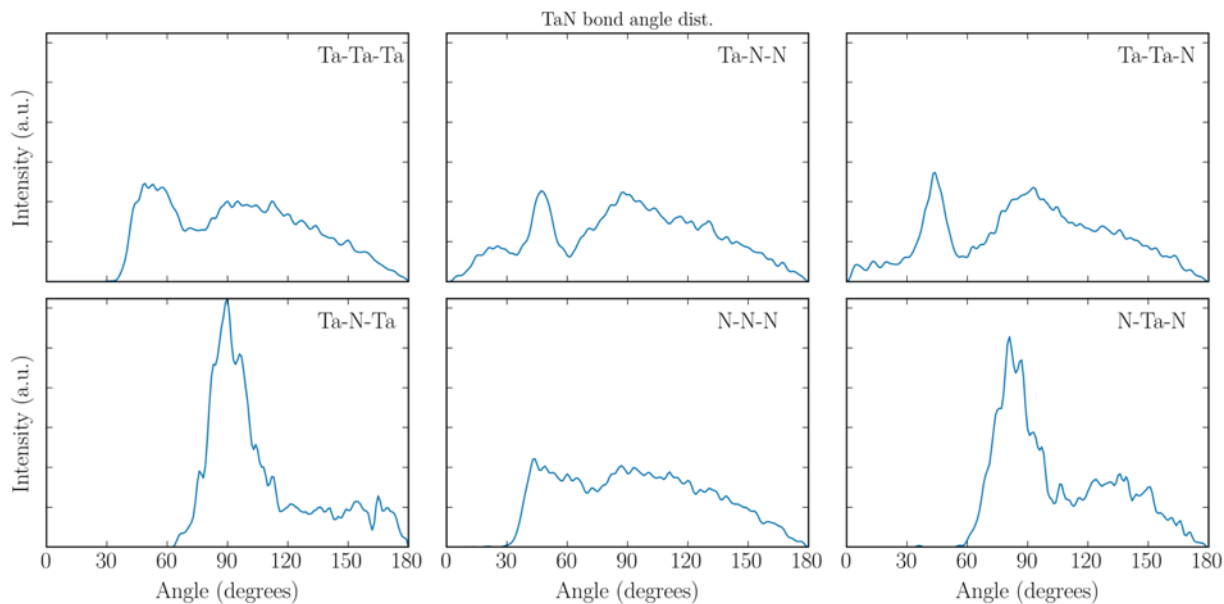

**fig. S73. Bond-angle distribution functions of amorphous configurations.** Bond angle distribution functions of AIMD-generated amorphous TaN.

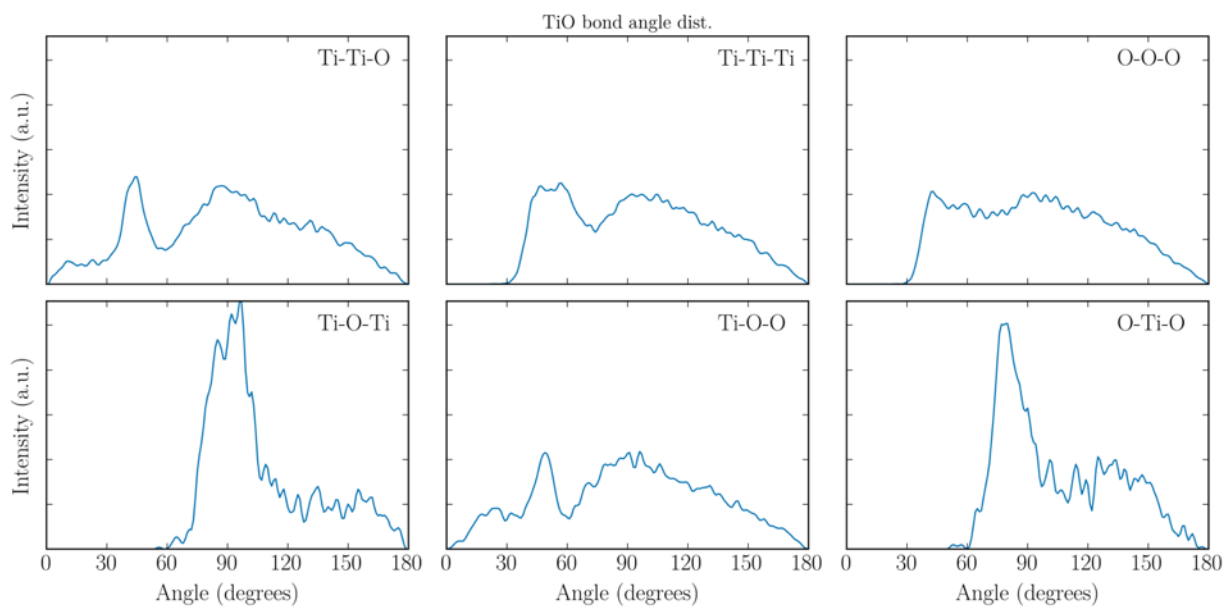

**fig. S74. Bond-angle distribution functions of amorphous configurations.** Bond angle distribution functions of AIMD-generated amorphous TiO.

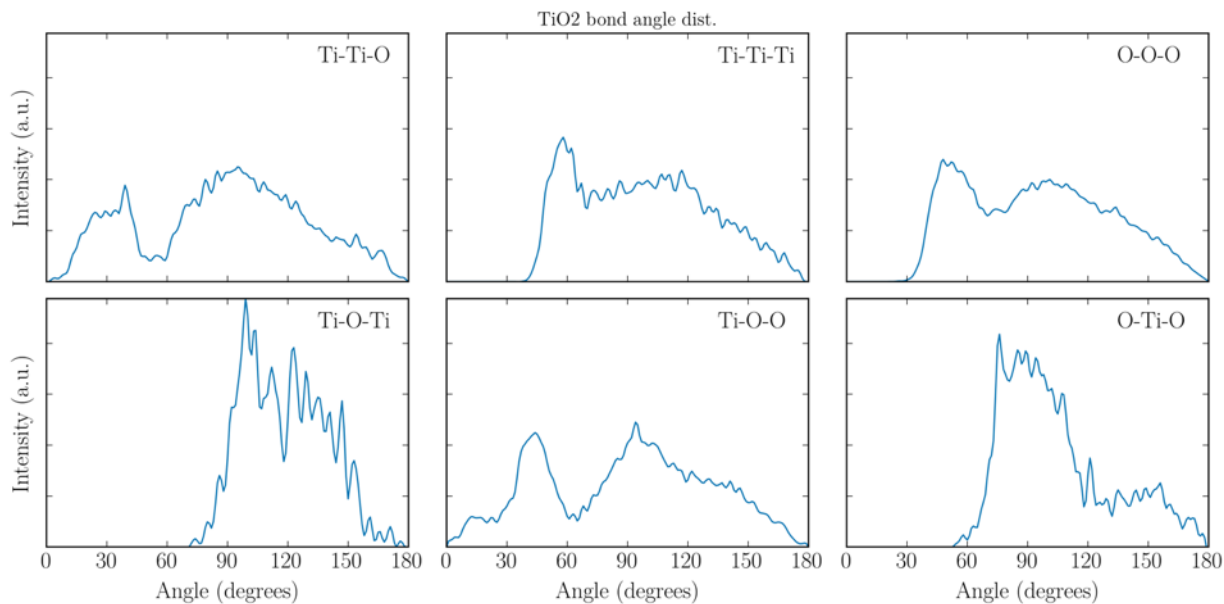

**fig. S75. Bond-angle distribution functions of amorphous configurations.** Bond angle distribution functions of AIMD-generated amorphous TiO<sub>2</sub>.

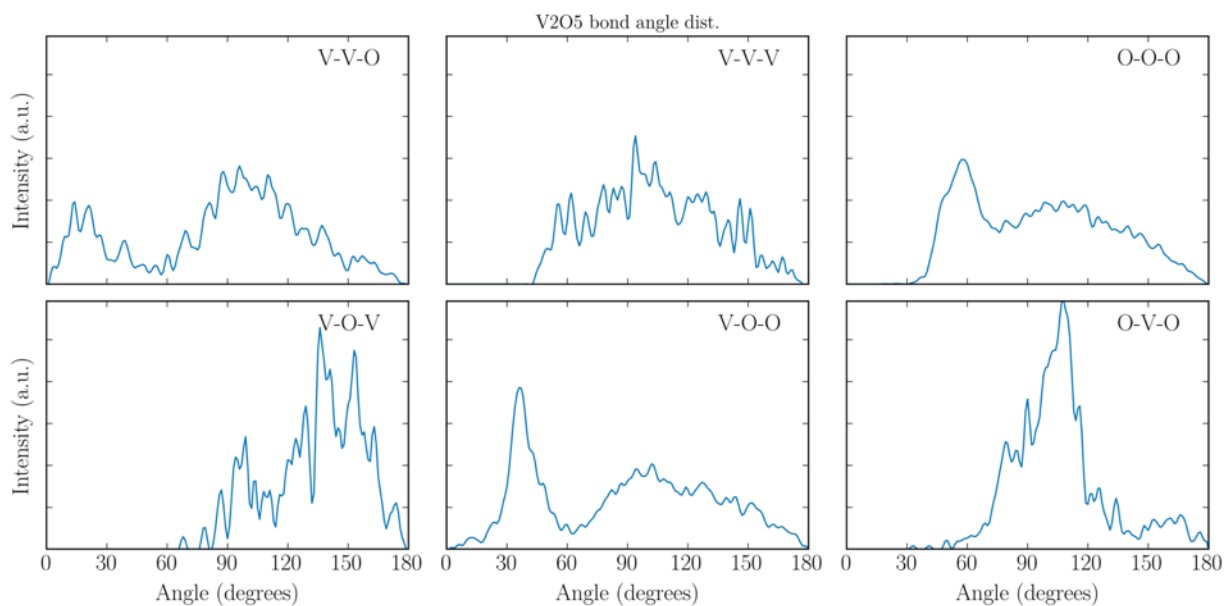

**fig. S76. Bond-angle distribution functions of amorphous configurations.** Bond angle distribution functions of AIMD-generated amorphous V<sub>2</sub>O<sub>5</sub>.



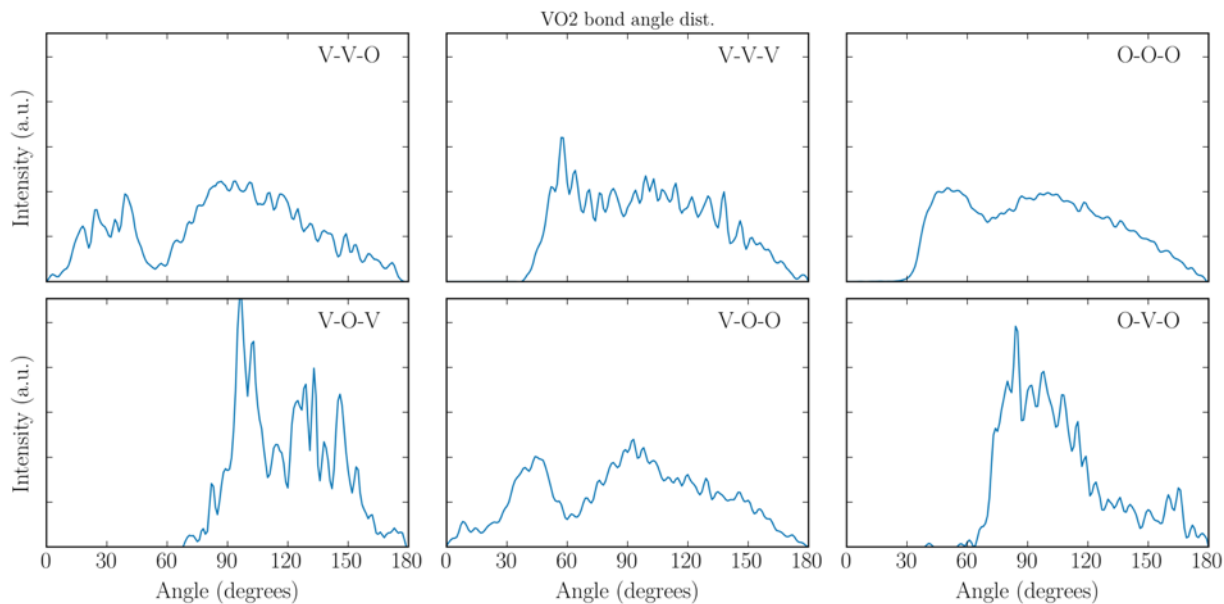

**fig. S77. Bond-angle distribution functions of amorphous configurations.** Bond angle distribution functions of AIMD-generated amorphous VO<sub>2</sub>.

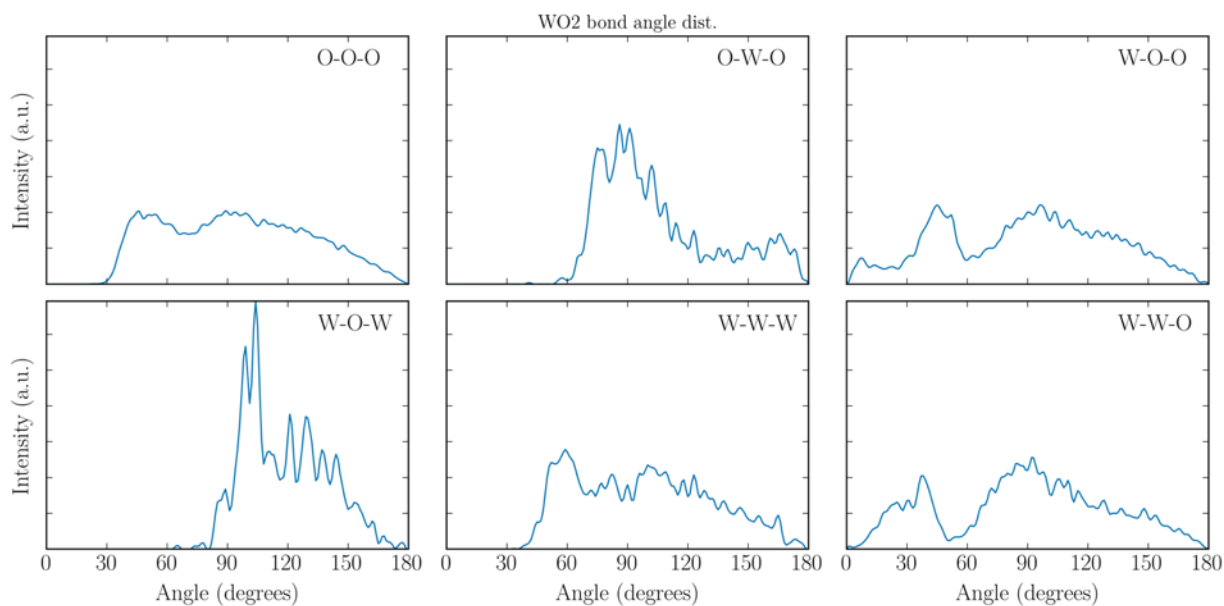

**fig. S78. Bond-angle distribution functions of amorphous configurations.** Bond angle distribution functions of AIMD-generated amorphous WO<sub>2</sub>.

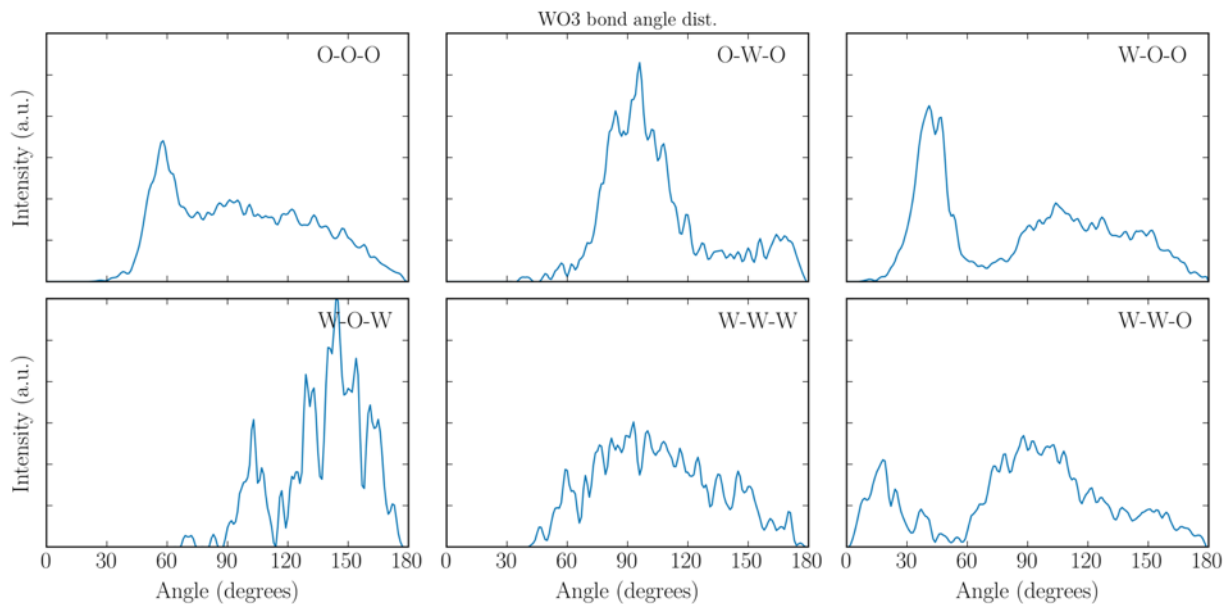

**fig. S79. Bond-angle distribution functions of amorphous configurations.** Bond angle distribution functions of AIMD-generated amorphous WO<sub>3</sub>.

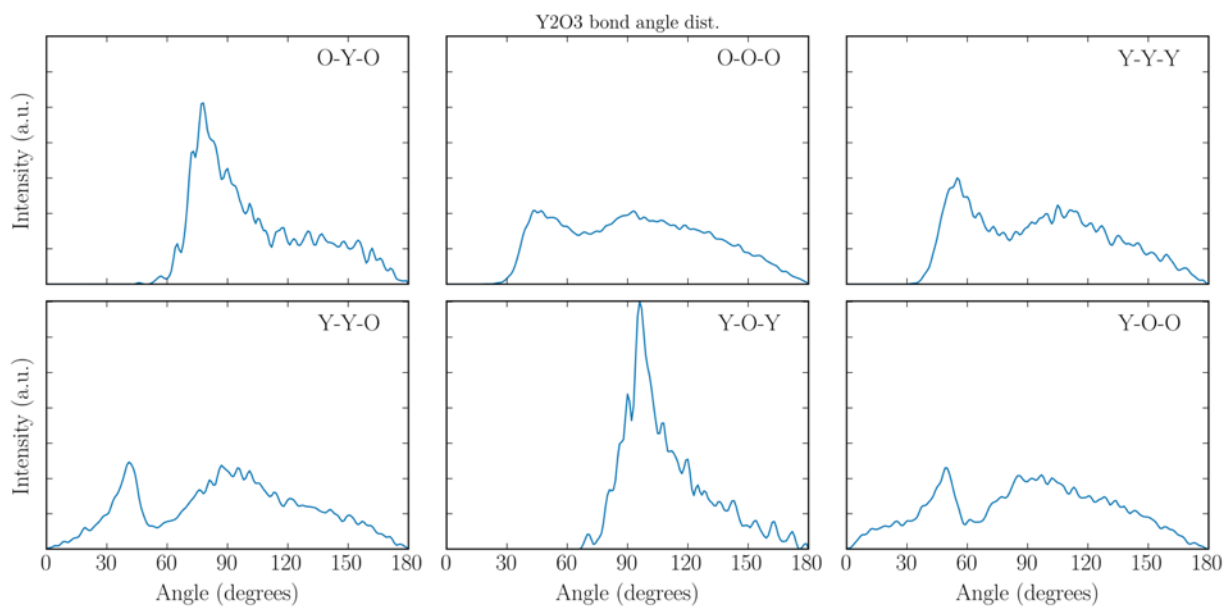

**fig. S80. Bond-angle distribution functions of amorphous configurations.** Bond angle distribution functions of AIMD-generated amorphous Y<sub>2</sub>O<sub>3</sub>.

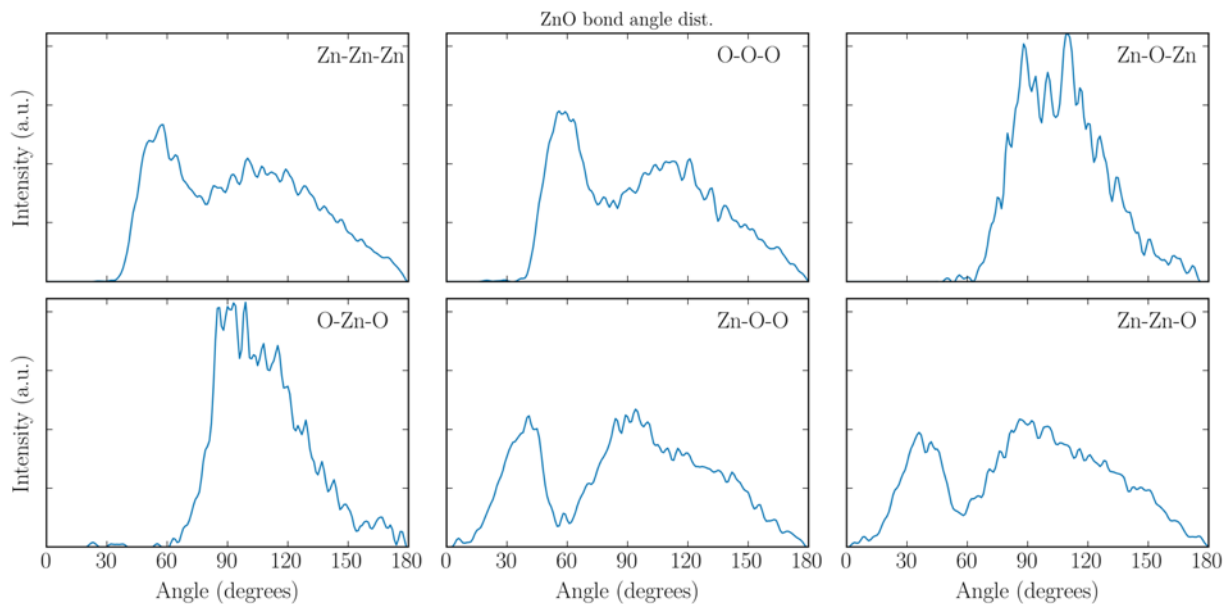

**fig. S81. Bond-angle distribution functions of amorphous configurations.** Bond angle distribution functions of AIMD-generated amorphous ZnO.

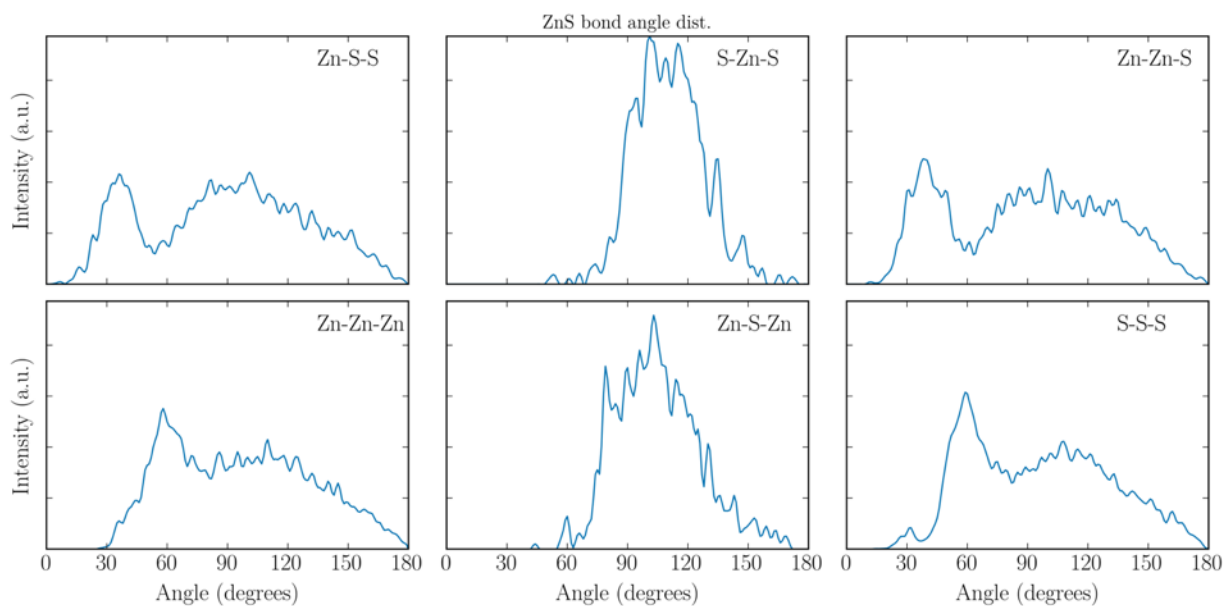

**fig. S82. Bond-angle distribution functions of amorphous configurations.** Bond angle distribution functions of AIMD-generated amorphous ZnS.

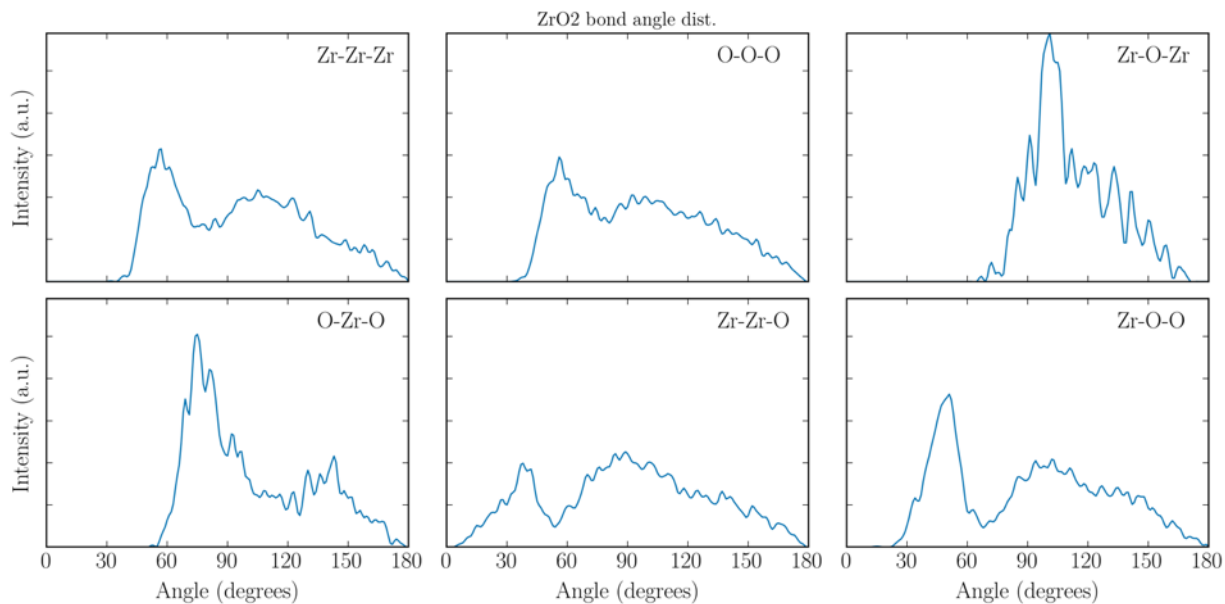

**fig. S83. Bond-angle distribution functions of amorphous configurations.** Bond angle distribution functions of AIMD-generated amorphous ZrO<sub>2</sub>.

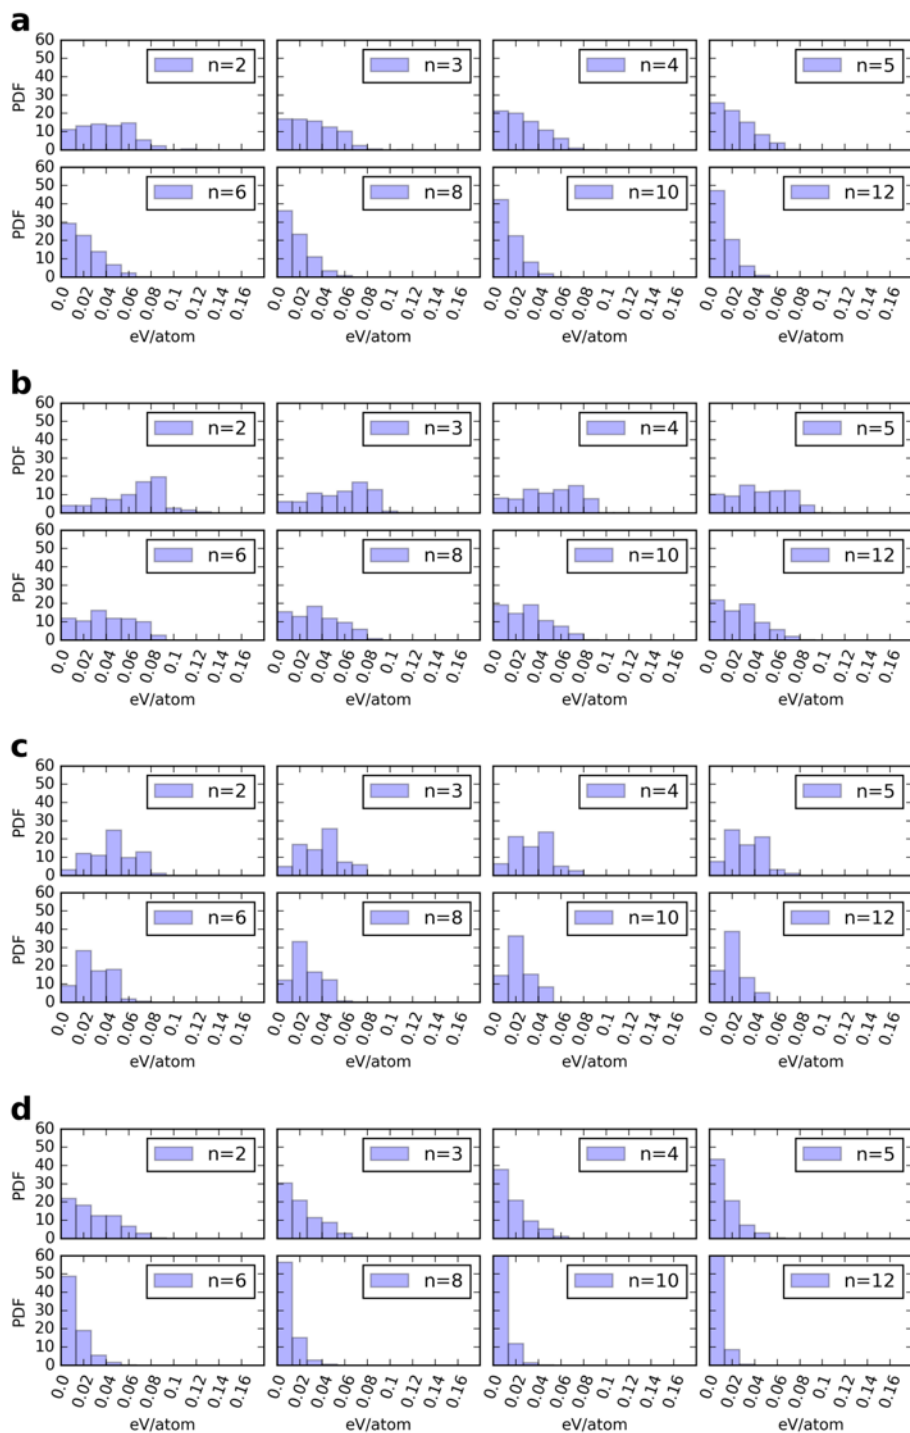

**fig. S84. Amorphous limit sampling probability.** Amorphous limit sampling probability. Probability density functions (PDFs) for sampling the minimum energy amorphous configuration taken by randomly sampling  $n$  configurations 10,000 times from larger populations of size  $N$  for (a)  $\text{Al}_2\text{O}_3$  with  $N = 50$ , (b)  $\text{GaN}$  with  $N = 35$ , (c)  $\text{V}_2\text{O}_5$  with  $N = 46$  and (d)  $\text{ZnS}$  with  $N = 44$ .

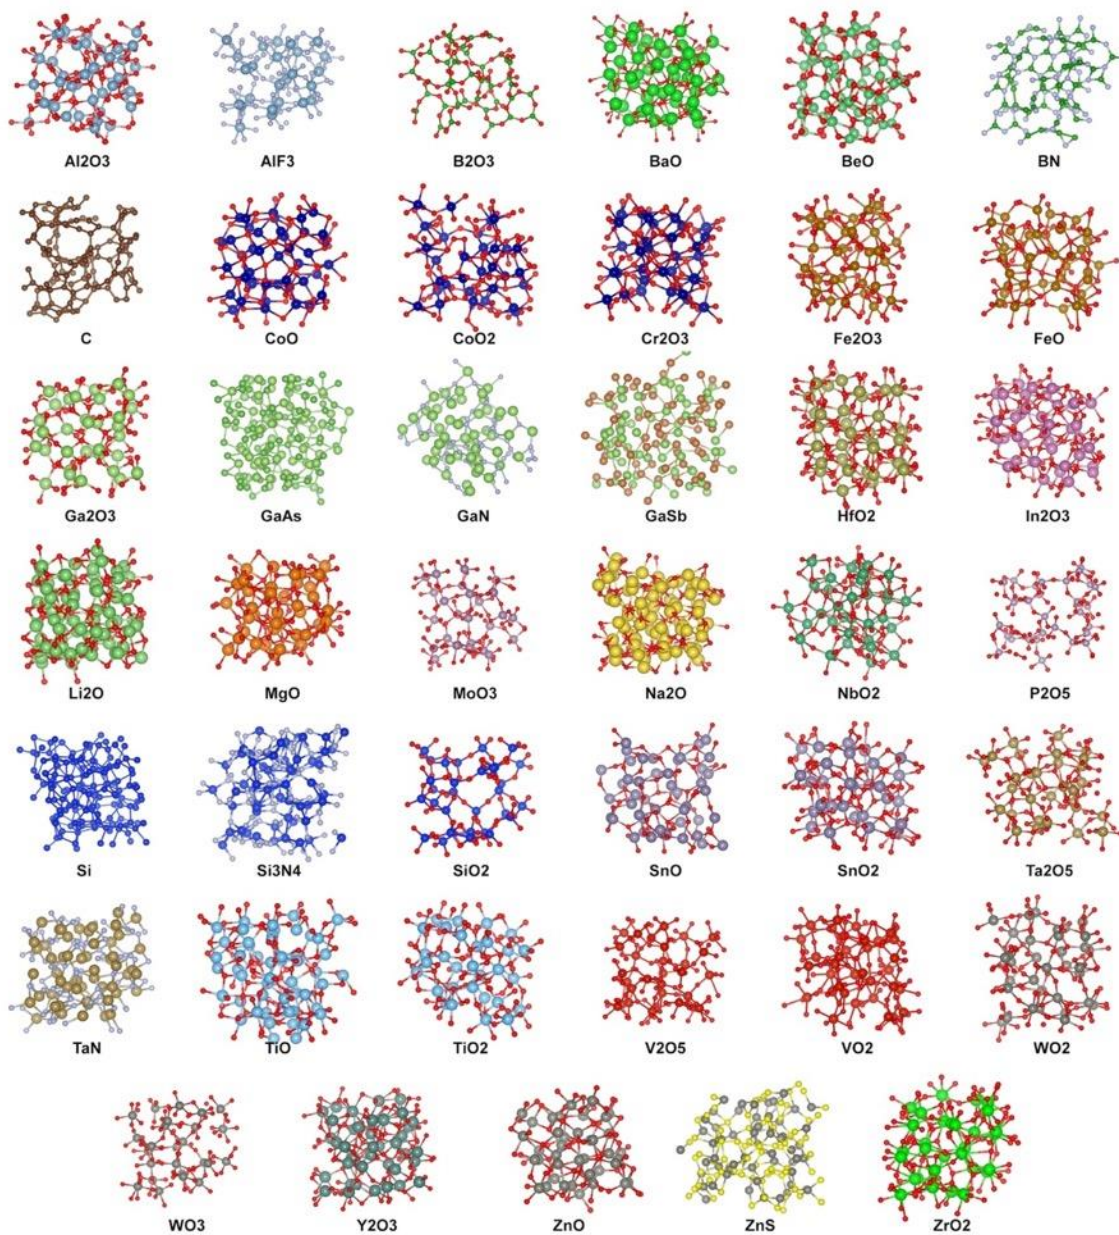

**fig. S85. Snapshots of atomic structures of amorphous materials.** Snapshots of atomic structures of amorphous materials. One representative configuration is shown for each material system for illustration purposes.

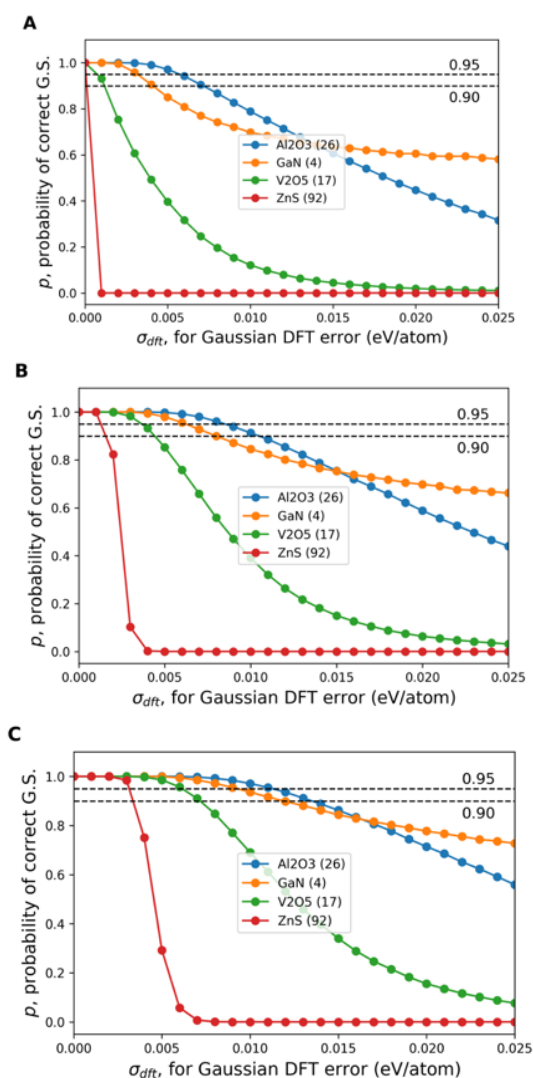

**fig. S86. Probability of finding the correct, observed ground states.** Probability of finding the correct, observed groundstate in Al<sub>2</sub>O<sub>3</sub>, GaN, V<sub>2</sub>O<sub>5</sub> and ZnS polymorphic systems (A) exactly as the DFT groundstate, or within (B) 5 meV/atom and (C) 10 meV/atom of the DFT groundstate, as a function of standard deviation ( $\sigma$ ) of hypothetical, Gaussian-distributed random errors in relative DFT energies. The number of entries in each system is given in parentheses. For each  $\sigma$  data-point of a chemical system, we perturbed all the entries available for that system in the Materials Project database with random errors drawn from a Gaussian distribution corresponding to that  $\sigma$ , repeated for  $10^5$  trials [in analogy with the analysis of effect of formation energy errors on convex hull (16)]. From these simulations, we evaluated the probability that the correct ground state is found (exactly or within the given tolerances) for a given  $\sigma$ . The tolerance accounts for not having an infinite precision in DFT simulations, and possible systematic errors. A larger tolerance gives slower decaying probabilities, and larger uncertainties for DFT energies.



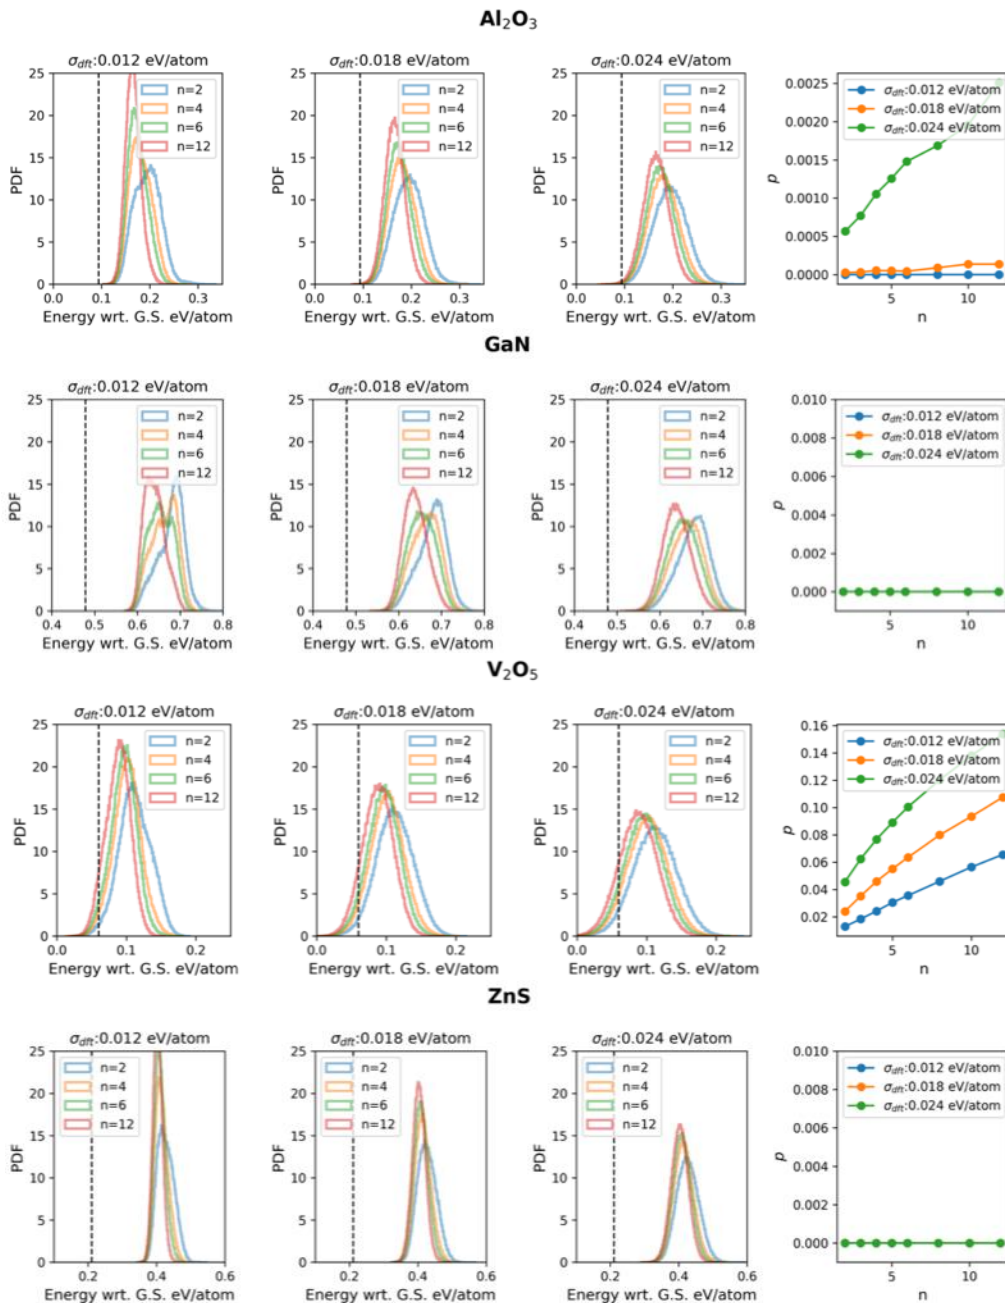

**fig. S87. PDFs from aggregated uncertainties in the amorphous limit classification of crystalline polymorphs.** Probability density functions (PDFs) from aggregated uncertainties in the amorphous limit classification of crystalline polymorphs. First three panels show PDFs obtained from statistical simulations with random sampling of amorphous energies with sample size  $n$  with DFT errors added by sampling from Gaussian distributions with a standard-deviation of 0.012, 0.018 and 0.024 eV/atom. The dashed-lines show the highest-energy polymorph reported among all experimentally synthesized phases (as obtained from the ICSD) in each system. The right-most panel shows the corresponding probabilities that at least one synthesizable compound is misclassified as not synthesizable.



**table S1. The amorphous limits for the synthesizability of polymorphs.** The amorphous limits (distance to groundstate energies) for the synthesizability of material polymorphs. These limits are calculated by the sampling amorphous structures quenched from ab-initio molecular dynamics generated liquids. By construction, the limits are fail-safe; that is, they cannot classify a synthesizable polymorph as otherwise, and by sampling more amorphous configurations, the limit can only become lower. Limits listed here are relevant on the  $G$ - $T$  domain close zero pressure.

| <b>Material</b>                    | <b>Amorphous limit<br/>(eV/atom)</b> | <b>Material</b>                    | <b>Amorphous limit<br/>(eV/atom)</b> |
|------------------------------------|--------------------------------------|------------------------------------|--------------------------------------|
| <b>Al<sub>2</sub>O<sub>3</sub></b> | 0.154                                | <b>Na<sub>2</sub>O</b>             | 0.147                                |
| <b>AlF<sub>3</sub></b>             | 0.173                                | <b>NbO<sub>2</sub></b>             | 0.209                                |
| <b>B<sub>2</sub>O<sub>3</sub></b>  | 0.063                                | <b>P<sub>2</sub>O<sub>5</sub></b>  | 0.177                                |
| <b>BaO</b>                         | 0.172                                | <b>Si</b>                          | 0.310                                |
| <b>BeO</b>                         | 0.258                                | <b>Si<sub>3</sub>N<sub>4</sub></b> | 0.359                                |
| <b>BN</b>                          | 0.621                                | <b>SiO<sub>2</sub></b>             | 0.114                                |
| <b>C</b>                           | 0.933                                | <b>SnO</b>                         | 0.190                                |
| <b>CoO</b>                         | 0.285                                | <b>SnO<sub>2</sub></b>             | 0.275                                |
| <b>CoO<sub>2</sub></b>             | 0.200                                | <b>Ta<sub>2</sub>O<sub>5</sub></b> | 0.165                                |
| <b>Cr<sub>2</sub>O<sub>3</sub></b> | 0.349                                | <b>TaN</b>                         | 0.463                                |
| <b>Fe<sub>2</sub>O<sub>3</sub></b> | 0.246                                | <b>TiO</b>                         | 0.259                                |
| <b>FeO</b>                         | 0.246                                | <b>TiO<sub>2</sub></b>             | 0.161                                |
| <b>Ga<sub>2</sub>O<sub>3</sub></b> | 0.148                                | <b>V<sub>2</sub>O<sub>5</sub></b>  | 0.067                                |
| <b>GaAs</b>                        | 0.409                                | <b>VO<sub>2</sub></b>              | 0.208                                |
| <b>GaN</b>                         | 0.616                                | <b>WO<sub>2</sub></b>              | 0.488                                |
| <b>GaSb</b>                        | 0.291                                | <b>WO<sub>3</sub></b>              | 0.223                                |
| <b>HfO<sub>2</sub></b>             | 0.210                                | <b>Y<sub>2</sub>O<sub>3</sub></b>  | 0.225                                |
| <b>In<sub>2</sub>O<sub>3</sub></b> | 0.268                                | <b>ZnO</b>                         | 0.246                                |
| <b>Li<sub>2</sub>O</b>             | 0.152                                | <b>ZnS</b>                         | 0.399                                |
| <b>MgO</b>                         | 0.254                                | <b>ZrO<sub>2</sub></b>             | 0.202                                |
| <b>MoO<sub>3</sub></b>             | 0.136                                |                                    |                                      |

**Caption for Database S1 (separate file)**

**database S1. Energies of amorphous configurations.** Total energies (eV/atom) of amorphous configurations as obtained with the AIMD+DFT procedure described in Materials and Methods, available as a *json* dictionary.
